# Supplementary material for: Collision-Induced Dissociations of Linear Hexose and Disaccharides with Linear Hexose at the Reducing End
Source: PubMed Central journal article supplement (PMC11613545; doi:10.1021/acs.jpca.4c05929), 2024-11-18
Supplement: jp4c05929_si_001.pdf [file jp4c05929_si_001.pdf]

Supporting Information

**Collision-Induced Dissociations of Linear Hexose and Disaccharides with  
Linear Hexose at the Reducing End**

Hock-Seng Nguan<sup>1\*</sup>, Hsu-Chen Hsu<sup>1</sup>, Wun-Long Li<sup>1,2</sup>, Chia Yen Liew<sup>1,3</sup>, and Chi-Kung  
Ni<sup>1,4\*</sup>

1 Institute of Atomic and Molecular Sciences, Academia Sinica, P. O. Box 23-166, Taipei 10617,  
Taiwan.

2. Department of Chemistry, National Taiwan Normal University, Taipei 11677, Taiwan

3. Current address: Division of Biology and Biological Engineering, California Institute of  
Technology, CA, 91125, USA.

4 Department of Chemistry, National Tsing Hua University, Hsinchu 30013, Taiwan

Corresponding authors: E-mail: [nguanhs@gmail.com](mailto:nguanhs@gmail.com), [ckni@po.iams.sinica.edu.tw](mailto:ckni@po.iams.sinica.edu.tw)

| <b>Contents</b>                                                                  | <b>Page</b> |
|----------------------------------------------------------------------------------|-------------|
| Figure S1: Calculations results of Glc-L1 C-C bond cleavage reaction.            | 3           |
| Figure S2: Calculations results of Glc-L1 C=O migration.                         | 3           |
| Figure S3: Calculations results of Glc-L2 C-C bond cleavage reaction.            | 4           |
| Figure S4: Calculations results of Glc-L2 C=O migration.                         | 4           |
| Figure S5: Calculations results of Glc-L3a C-C bond cleavage reaction.           | 5           |
| Figure S6: Calculations results of Glc-L3a C=O migration.                        | 6           |
| Figure S7: Calculations results of Glc-L3b C-C bond cleavage reaction.           | 7           |
| Figure S8: Calculations results of Glc-L3b C=O migration.                        | 7           |
| Figure S9: Calculations results of Man-L1 C-C bond cleavage reaction.            | 8           |
| Figure S10: Calculations results of Man-L1 C=O migration.                        | 8           |
| Figure S11: Calculations results of Gal-L1 C-C bond cleavage reaction.           | 9           |
| Figure S12: Calculations results of Gal-L1 C=O migration.                        | 9           |
| Figure S13: Calculations results of Gal-L2 C-C bond cleavage reaction.           | 10          |
| Figure S14: Calculations results of Gal-L2 C=O migration.                        | 10          |
| Figure S15: Calculations results of Gal-L3a C-C bond cleavage reaction.          | 11          |
| Figure S16: Calculations results of Gal-L3a C=O migration.                       | 11          |
| Figure S17: Calculations results of Gal-L3b C-C bond cleavage reaction.          | 12          |
| Figure S18: Calculations results of Gal-L3b C=O migration.                       | 12          |
| Figure S19: Calculations results of Iso-L1 C-C bond cleavage reaction.           | 13          |
| Figure S20: Calculations results of Iso-L1 C=O migration.                        | 14          |
| Figure S21: Calculations results of Iso-L2 C-C bond cleavage reaction.           | 15          |
| Figure S22: Calculations results of Iso-L2 C=O migration.                        | 16          |
| Figure S23: Calculations results of Iso-L3a C-C bond cleavage reaction.          | 16          |
| Figure S24: Calculations results of Iso-L3a C=O migration.                       | 17          |
| Figure S25: Geometries of the lowest TSs for isomaltose linear forms.            | 18          |
| Figure S26: Geometries of the global minimum.                                    | 18          |
| Figure S27: Calculations results of glucose linear forms dehydration reaction.   | 19          |
| Figure S28: Calculations results of galactose linear forms dehydration reaction. | 19          |
| Figure S29: Geometries of the lowest dehydration TSs.                            | 20          |
| XYZ coordinates for minimum and transition states                                | 21-215      |

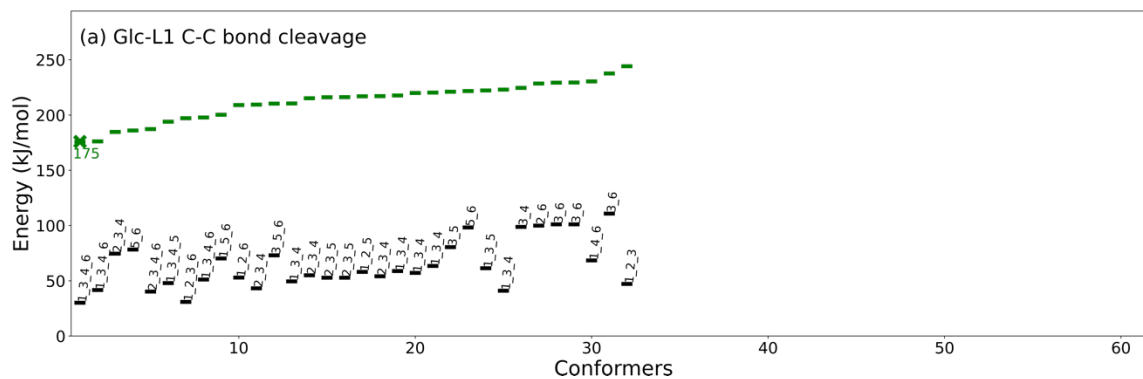

Figure S1. Calculated zero-point corrected energies of TSs and reactants of Glc-L1 for C-C bond cleavage reaction. The green lines represent the TS energies of C-C bond, the cross is the energy of the lowest TSs from our previous study<sup>1</sup> reoptimized using DFT/M06-2X method. The black lines right below each TS represent the energies of the reactant states leading to the TSs, where the numbers above the black line represent the numberings of the O atoms that bind to sodium ion.

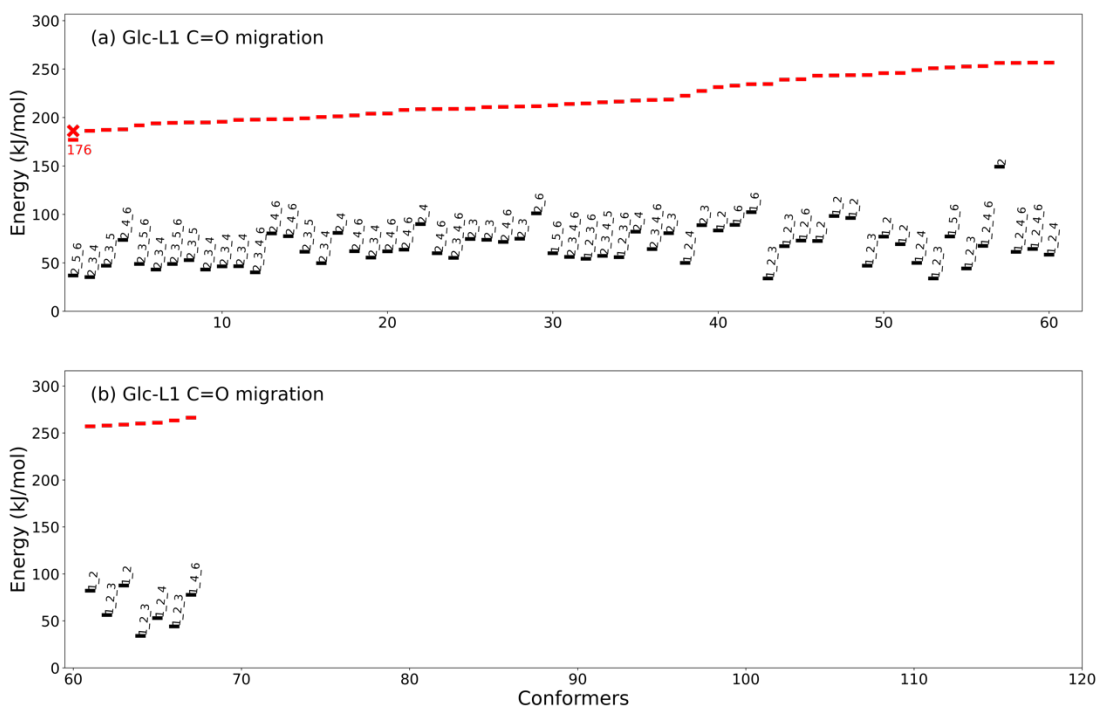

Figure S2. Calculated zero-point corrected energies of TSs and reactants of Glc-L1 for C=O migration. The red lines represent the TS energies of C-C bond, the cross is the energy of the lowest TSs from our previous study<sup>1</sup> reoptimized using DFT/M06-2X method. The black lines right below each TS represent the energies of the reactant states leading to the TSs, where the numbers above the black line represent the numberings of the O atoms that bind to sodium ion.

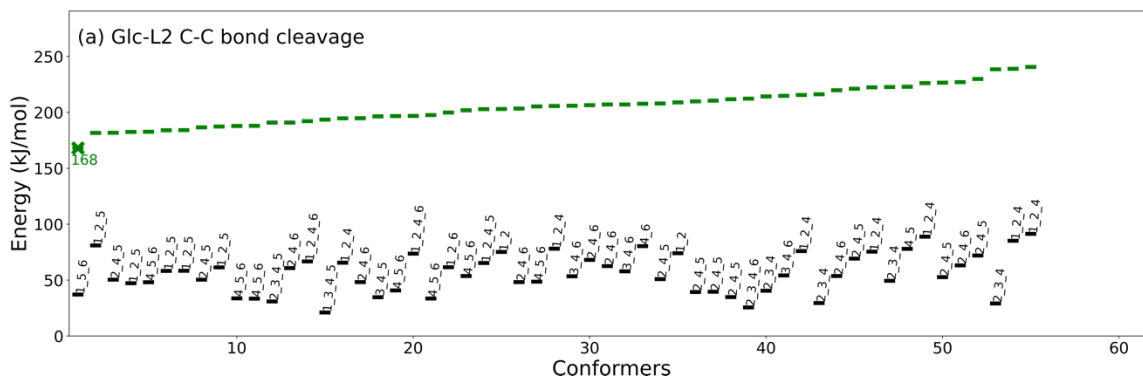

Figure S3. Calculated zero-point corrected energies of TSs and reactants of Glc-L2 for C-C bond cleavage reaction. The green lines represent the TS energies of C-C bond, the cross is the energy of the lowest TSs from our previous study<sup>1</sup> reoptimized using DFT/M06-2X method. The black lines right below each TS represent the energies of the reactant states leading to the TSs, where the numbers above the black line represent the numberings of the O atoms that bind to sodium ion.

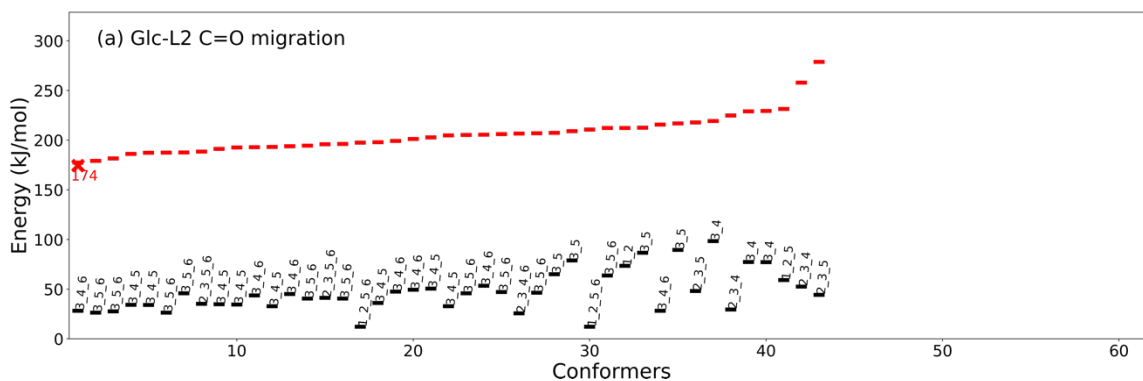

Figure S4. Calculated zero-point corrected energies of TSs and reactants of Glc-L2 for C=O migration. The red lines represent the TS energies of C-C bond, the cross is the energy of the lowest TSs from our previous study<sup>1</sup> reoptimized using DFT/M06-2X method. The black lines right below each TS represent the energies of the reactant states leading to the TSs, where the numbers above the black line represent the numberings of the O atoms that bind to sodium ion.

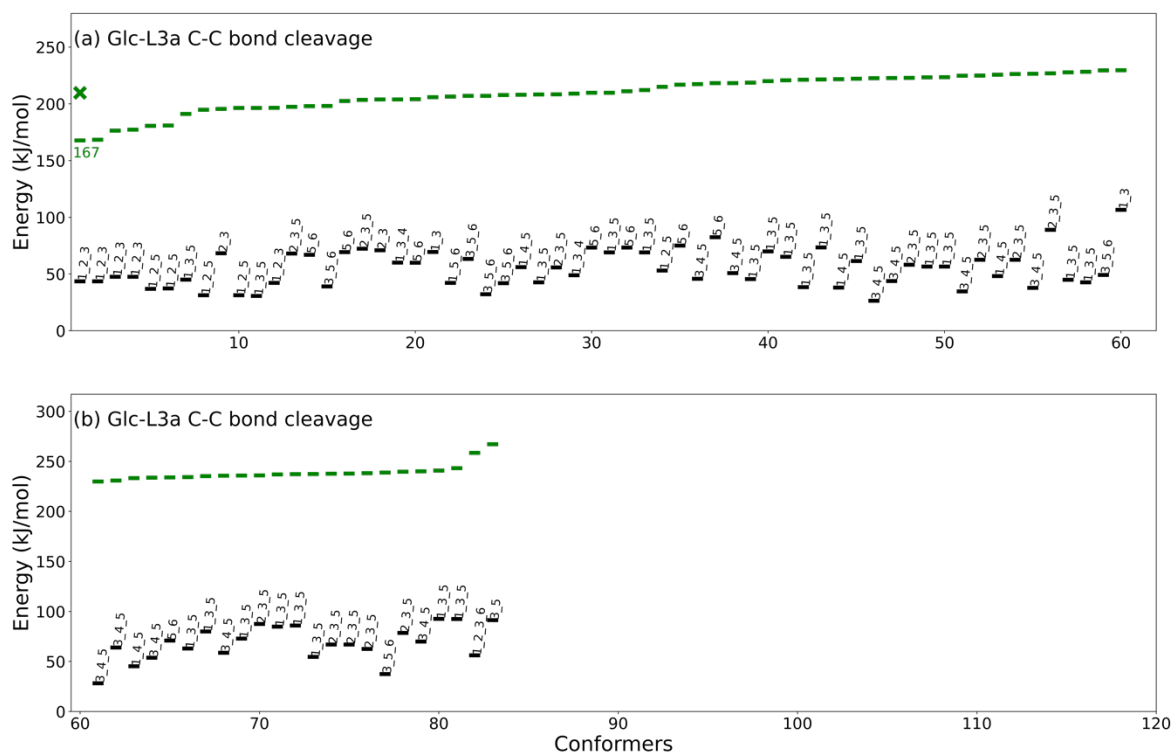

Figure S5. Calculated zero-point corrected energies of TSs and reactants of Glc-L3a for C-C bond cleavage reaction. The green lines represent the TS energies of C-C bond, the cross is the energy of the lowest TSs from our previous study<sup>1</sup> reoptimized using DFT/M06-2X method. The black lines right below each TS represent the energies of the reactant states leading to the TSs, where the numbers above the black line represent the numberings of the O atoms that bind to sodium ion.

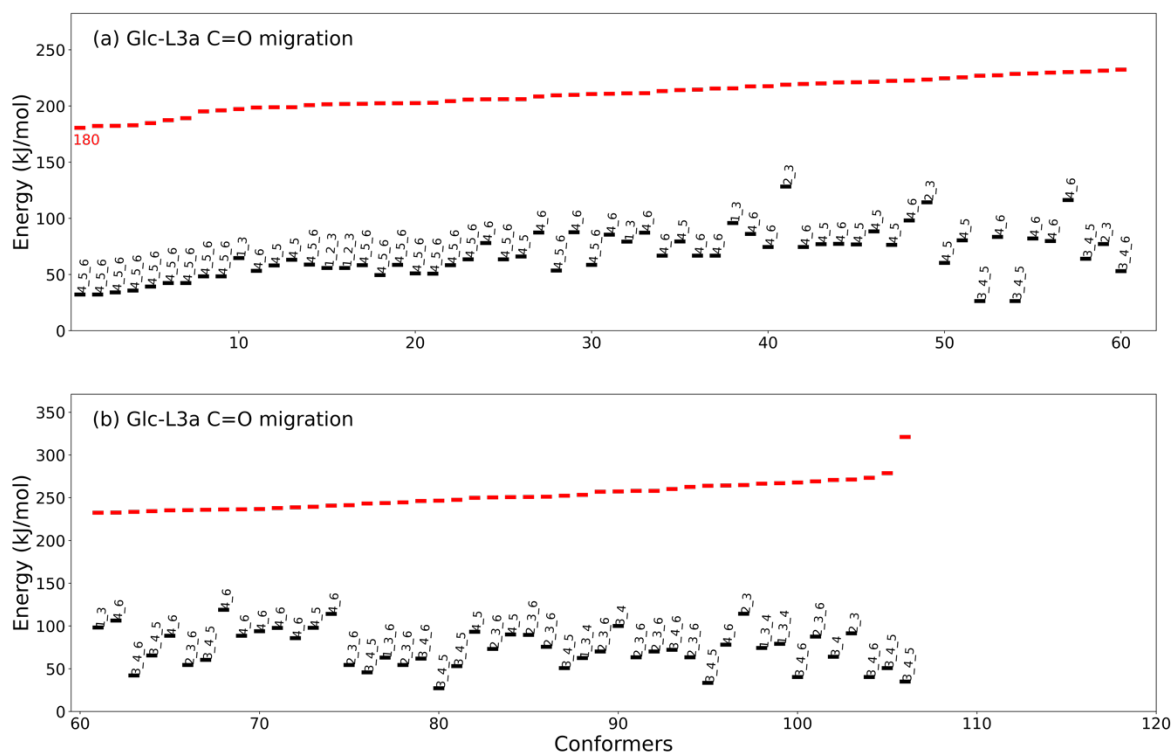

Figure S6. Calculated zero-point corrected energies of TSs and reactants of Glc-L3a for C=O migration. The red lines represent the TS energies of C-C bond. The black lines right below each TS represent the energies of the reactant states leading to the TSs, where the numbers above the black line represent the numberings of the O atoms that bind to sodium ion.

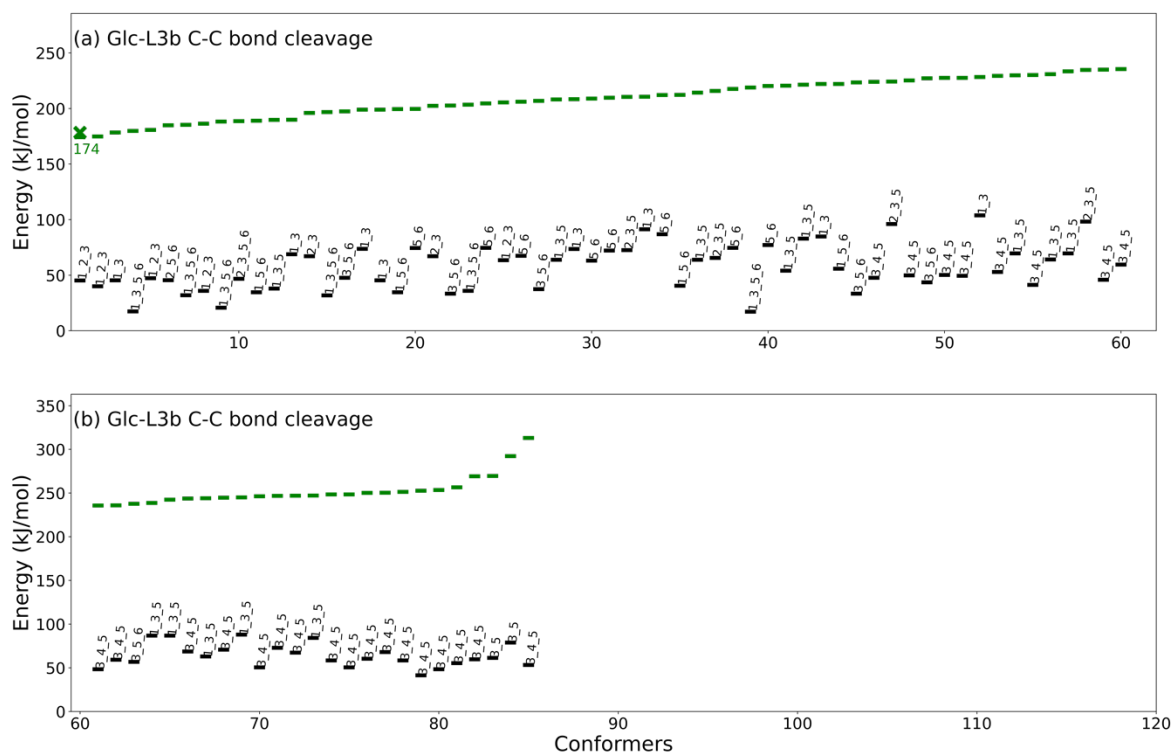

Figure S7. Calculated zero-point corrected energies of TSs and reactants of Glc-L3b for C-C bond cleavage reaction. The green lines represent the TS energies of C-C bond, the cross is the energy of the lowest TSs from our previous study<sup>1</sup> reoptimized using DFT/M06-2X method. The black lines right below each TS represent the energies of the reactant states leading to the TSs, where the numbers above the black line represent the numberings of the O atoms that bind to sodium ion.

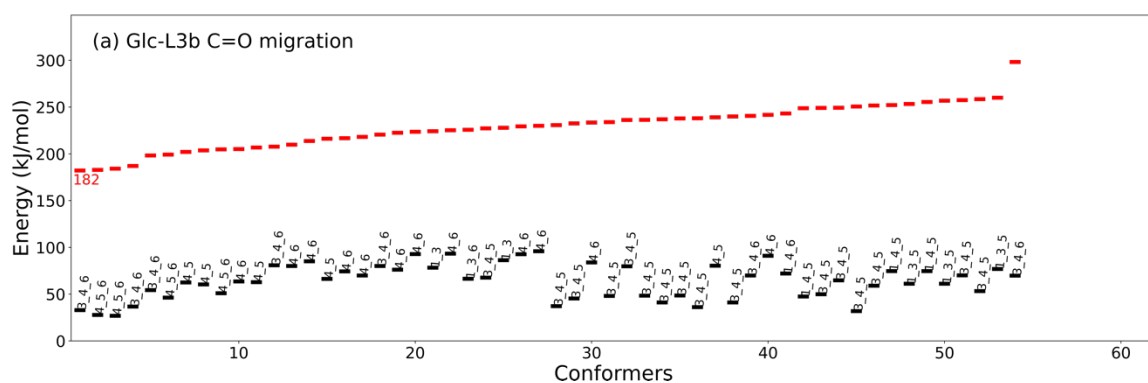

Figure S8. Calculated zero-point corrected energies of TSs and reactants of Glc-L3b for C=O migration. The red lines represent the TS energies of C-C bond. The black lines right below each TS represent the energies of the reactant states leading to the TSs, where the numbers above the black line represent the numberings of the O atoms that bind to sodium ion.

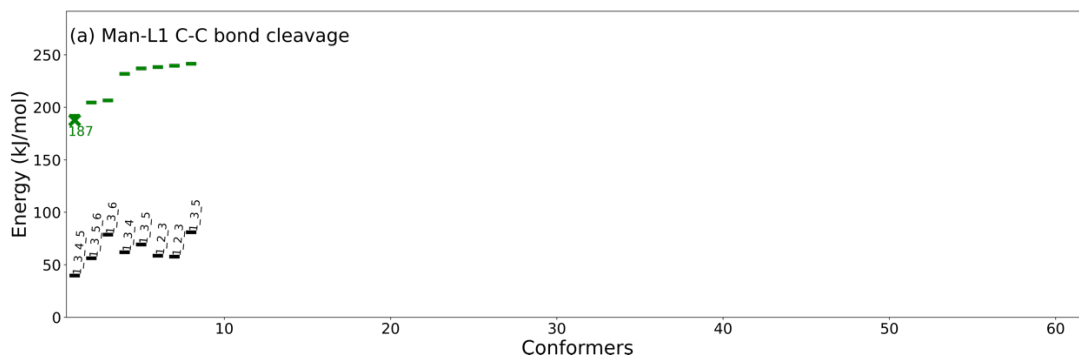

Figure S9. Calculated zero-point corrected energies of TSs and reactants of Man-L1 for C-C bond cleavage reaction. The green lines represent the TS energies of C-C bond, the cross is the energy of the lowest TSs from our previous study<sup>1</sup> reoptimized using DFT/M06-2X method. The black lines right below each TS represent the energies of the reactant states leading to the TSs, where the numbers above the black line represent the numberings of the O atoms that bind to sodium ion.

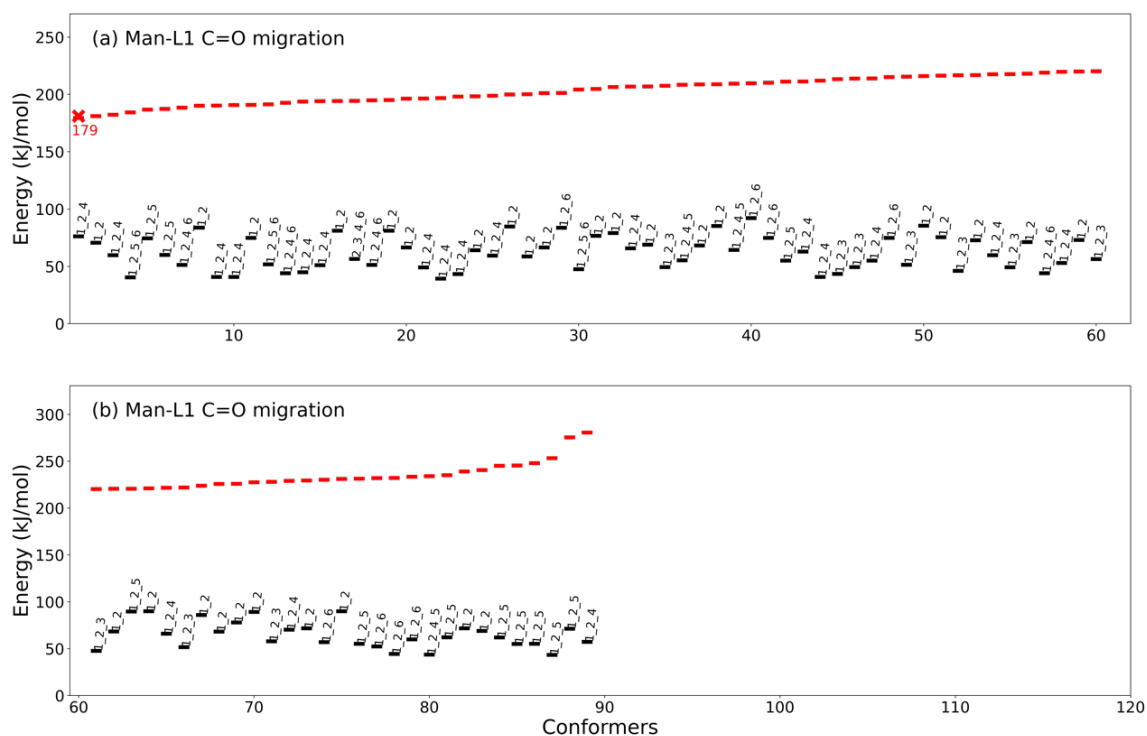

Figure S10. Calculated zero-point corrected energies of TSs and reactants of Man-L1 for C=O migration. The red lines represent the TS energies of C-C bond, the cross is the energy of the lowest TSs from our previous study<sup>1</sup> reoptimized using DFT/M06-2X method. The black lines right below each TS represent the energies of the reactant states leading to the TSs, where the numbers above the black line represent the numberings of the O atoms that bind to sodium ion.



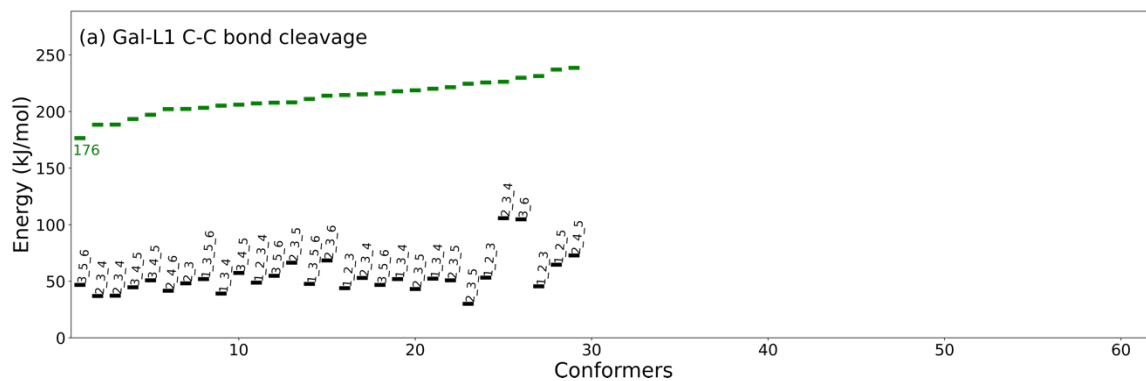

Figure S11. Calculated zero-point corrected energies of TSs and reactants of Gal-L1 for C-C bond cleavage reaction. The green lines represent the TS energies of C-C bond. The black lines right below each TS represent the energies of the reactant states leading to the TSs, where the numbers above the black line represent the numberings of the O atoms that bind to sodium ion.

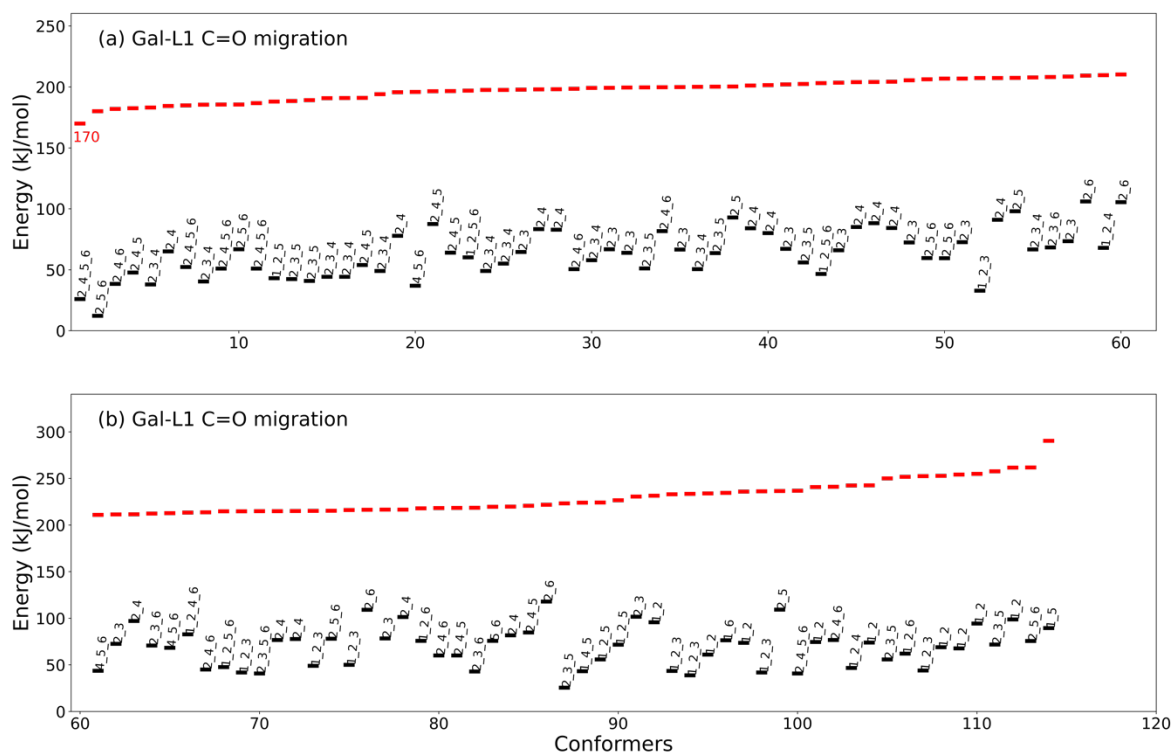

Figure S12. Calculated zero-point corrected energies of TSs and reactants of Gal-L1 for C=O migration. The red lines represent the TS energies of C-C bond. The black lines right below each TS represent the energies of the reactant states leading to the TSs, where the numbers above the black line represent the numberings of the O atoms that bind to sodium ion.

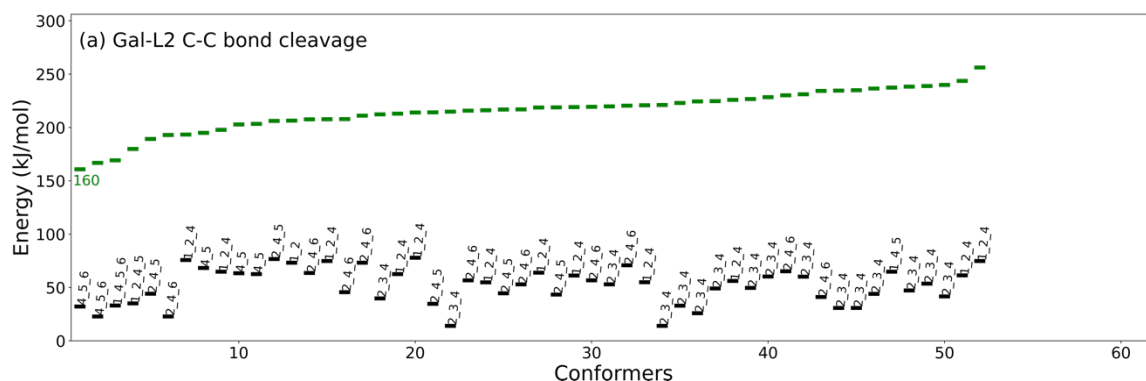

Figure S13. Calculated zero-point corrected energies of TSs and reactants of Gal-L2 for C-C bond cleavage reaction. The green lines represent the TS energies of C-C bond. The black lines right below each TS represent the energies of the reactant states leading to the TSs, where the numbers above the black line represent the numberings of the O atoms that bind to sodium ion.

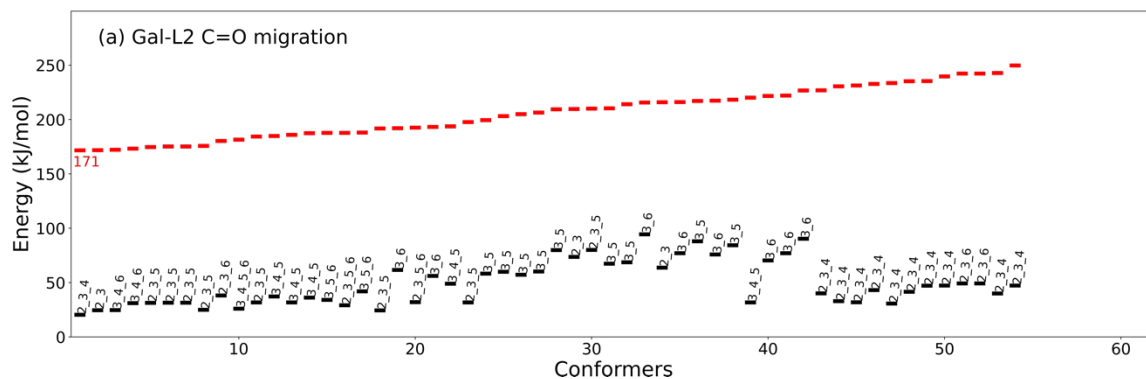

Figure S14. Calculated zero-point corrected energies of TSs and reactants of Gal-L2 for C=O migration. The red lines represent the TS energies of C-C bond. The black lines right below each TS represent the energies of the reactant states leading to the TSs, where the numbers above the black line represent the numberings of the O atoms that bind to sodium ion.

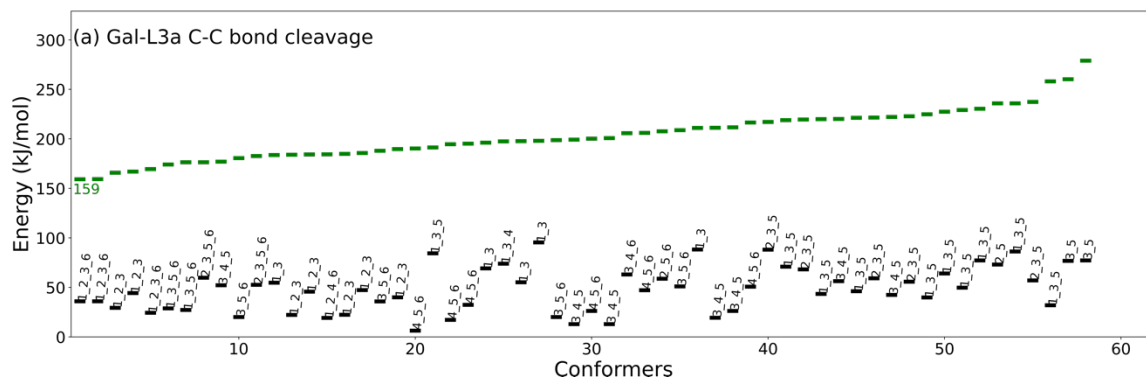

Figure S15. Calculated zero-point corrected energies of TSs and reactants of Gal-L3a for C-C bond cleavage reaction. The green lines represent the TS energies of C-C bond. The black lines right below each TS represent the energies of the reactant states leading to the TSs, where the numbers above the black line represent the numberings of the O atoms that bind to sodium ion.

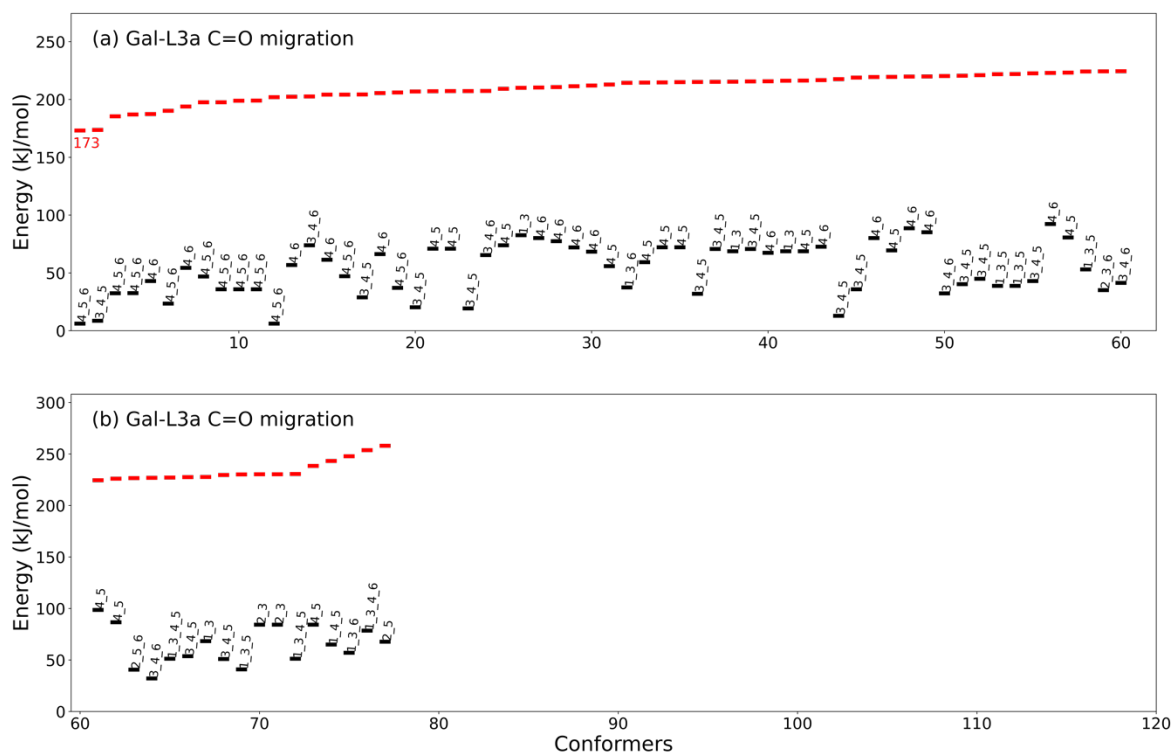

Figure S16. Calculated zero-point corrected energies of TSs and reactants of Gal-L3a for C=O migration. The red lines represent the TS energies of C-C bond. The black lines right below each TS represent the energies of the reactant states leading to the TSs, where the numbers above the black line represent the numberings of the O atoms that bind to sodium ion.

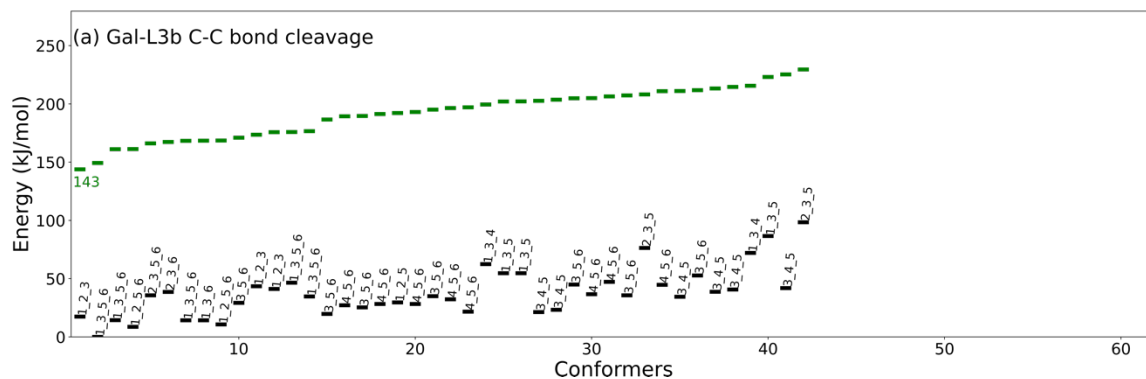

Figure S17. Calculated zero-point corrected energies of TSs and reactants of Gal-L3b for C-C bond cleavage reaction. The green lines represent the TS energies of C-C bond. The black lines right below each TS represent the energies of the reactant states leading to the TSs, where the numbers above the black line represent the numberings of the O atoms that bind to sodium ion.

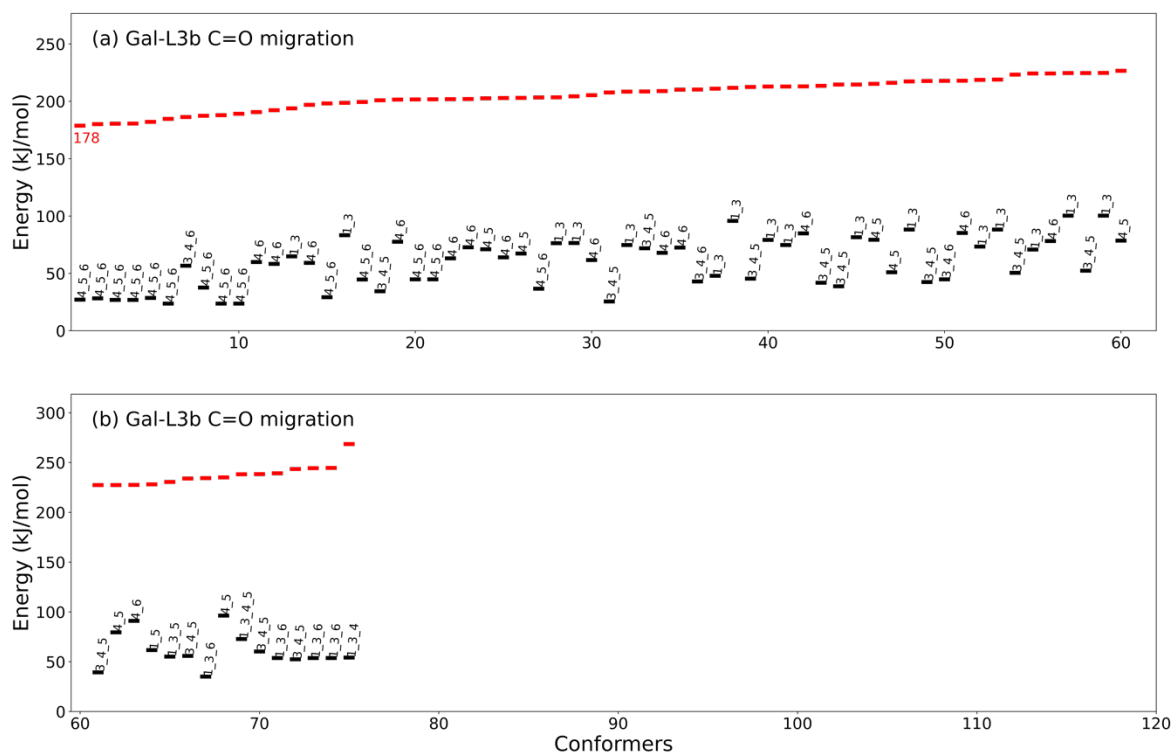

Figure S18. Calculated zero-point corrected energies of TSs and reactants of Gal-L3b for C=O migration. The red lines represent the TS energies of C-C bond. The black lines right below each TS represent the energies of the reactant states leading to the TSs, where the numbers above the black line represent the numberings of the O atoms that bind to sodium ion.

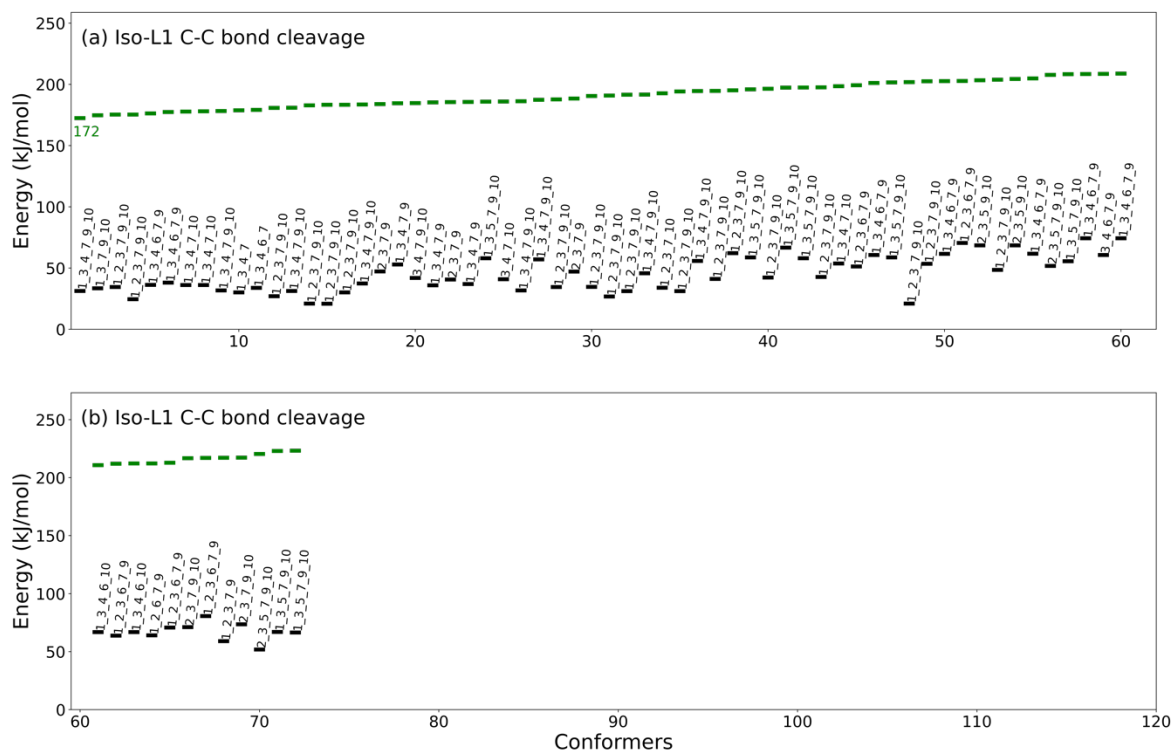

Figure S19. Calculated zero-point corrected energies of TSs and reactants of Iso-L1 for C-C bond cleavage reaction. The green lines represent the TS energies of C-C bond. The black lines right below each TS represent the energies of the reactant states leading to the TSs, where the numbers above the black line represent the numberings of the O atoms that bind to sodium ion.

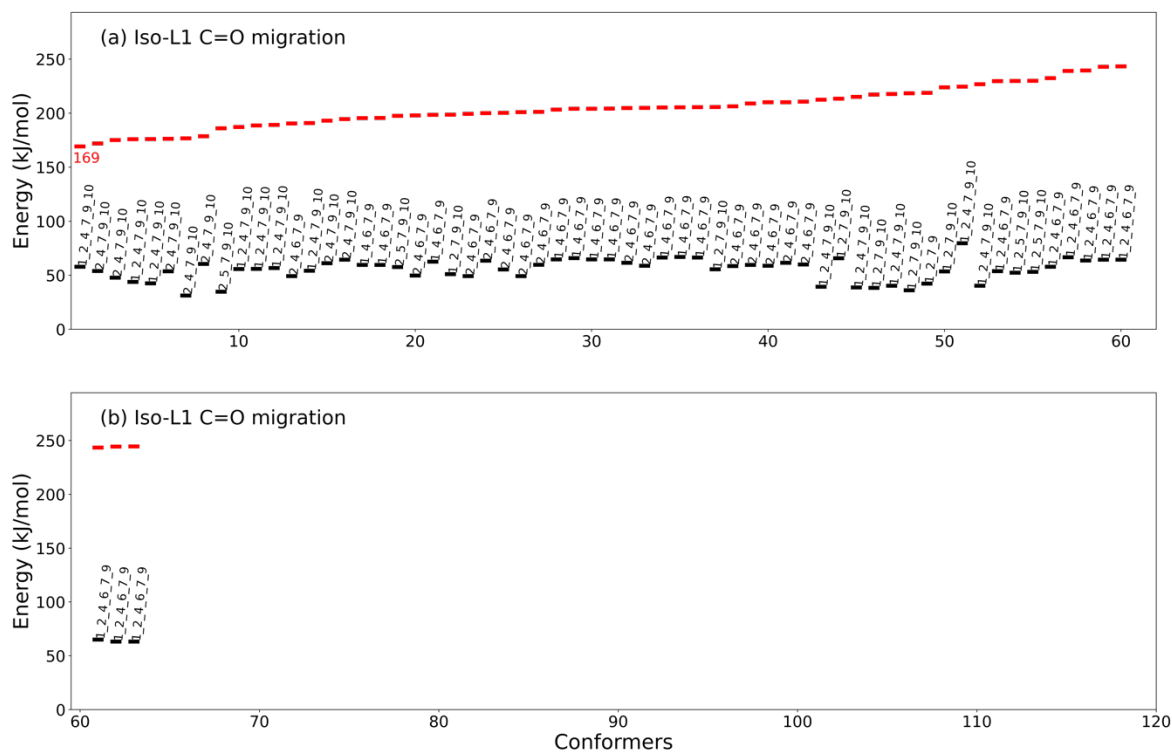

Figure S20. Calculated zero-point corrected energies of TSs and reactants of Iso-L1 for C=O migration. The red lines represent the TS energies of C-C bond. The black lines right below each TS represent the energies of the reactant states leading to the TSs, where the numbers above the black line represent the numberings of the O atoms that bind to sodium ion.

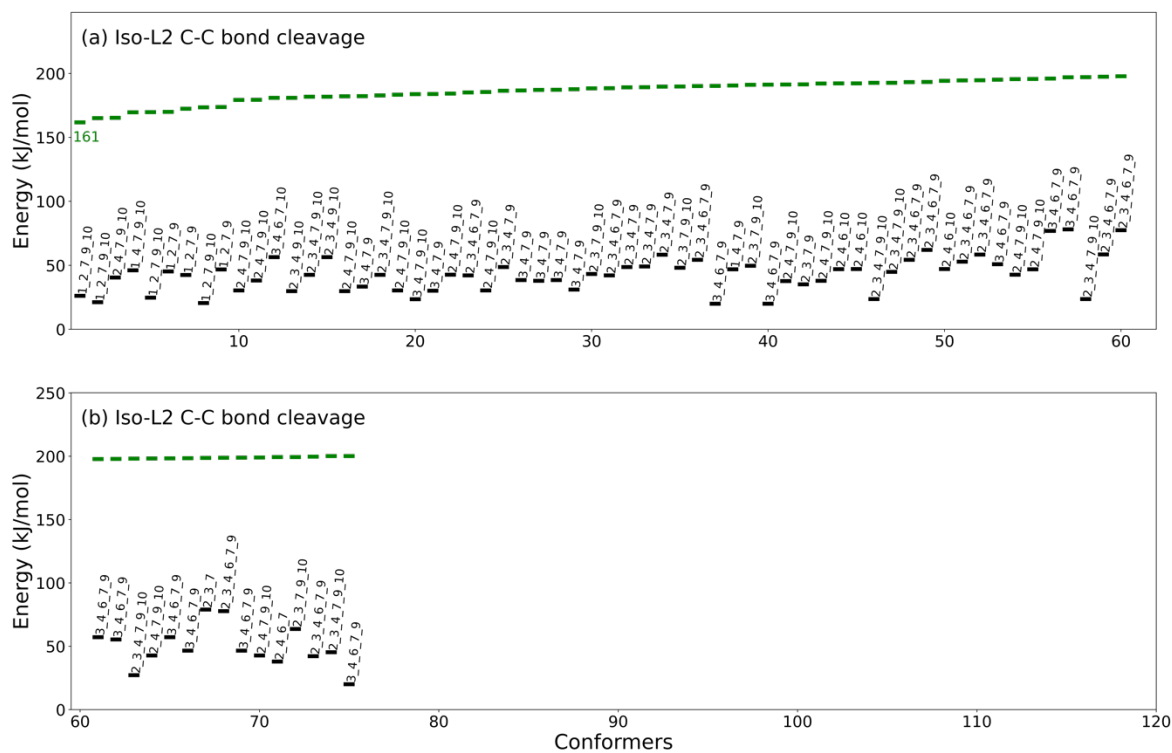

Figure S21. Calculated zero-point corrected energies of TSs and reactants of Iso-L2 for C-C bond cleavage reaction. The green lines represent the TS energies of C-C bond. The black lines right below each TS represent the energies of the reactant states leading to the TSs, where the numbers above the black line represent the numberings of the O atoms that bind to sodium ion.

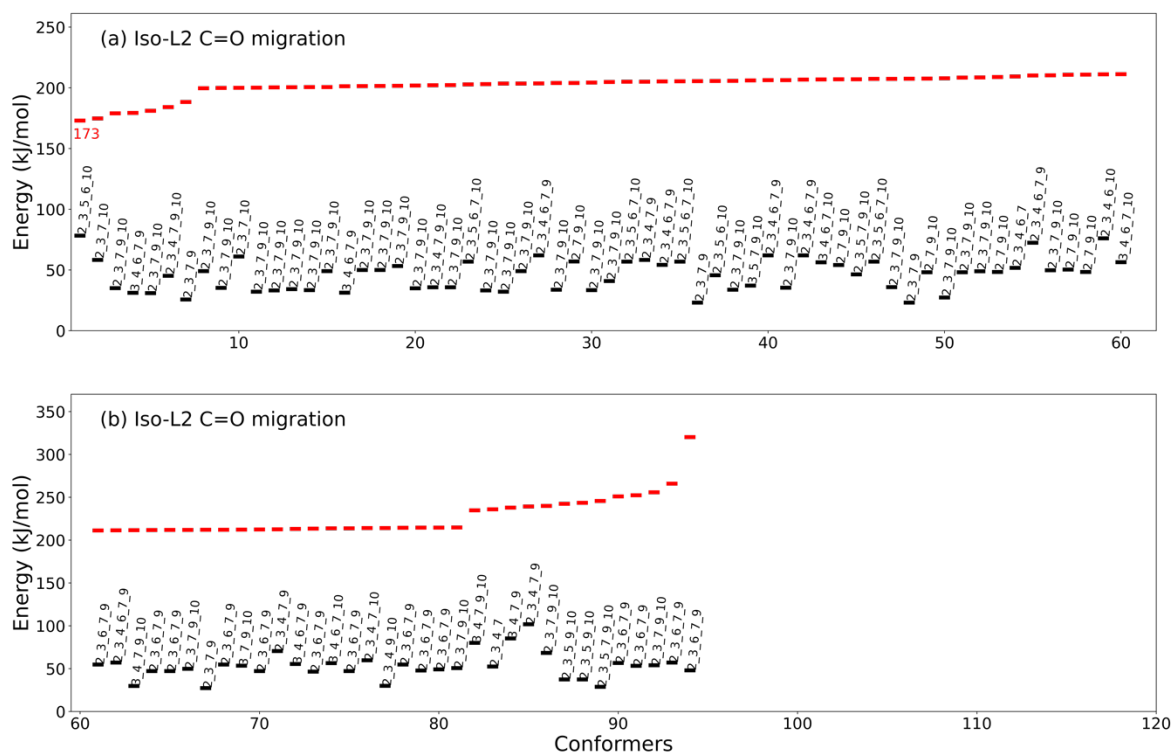

Figure S22. Calculated zero-point corrected energies of TSs and reactants of Iso-L2 for C=O migration. The red lines represent the TS energies of C-C bond. The black lines right below each TS represent the energies of the reactant states leading to the TSs, where the numbers above the black line represent the numberings of the O atoms that bind to sodium ion.

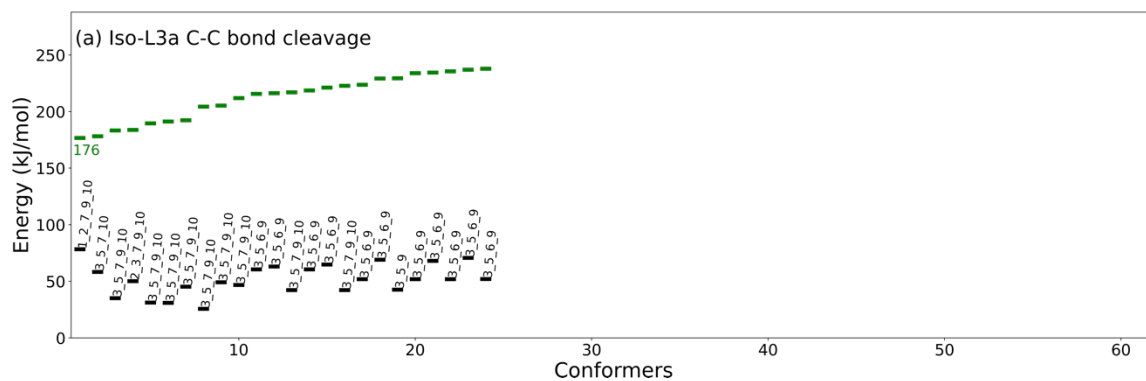

Figure S23. Calculated zero-point corrected energies of TSs and reactants of Iso-L3a for C-C bond cleavage reaction. The green lines represent the TS energies of C-C bond. The black lines right below each TS represent the energies of the reactant states leading to the TSs, where the numbers above the black line represent the numberings of the O atoms that bind to sodium ion.



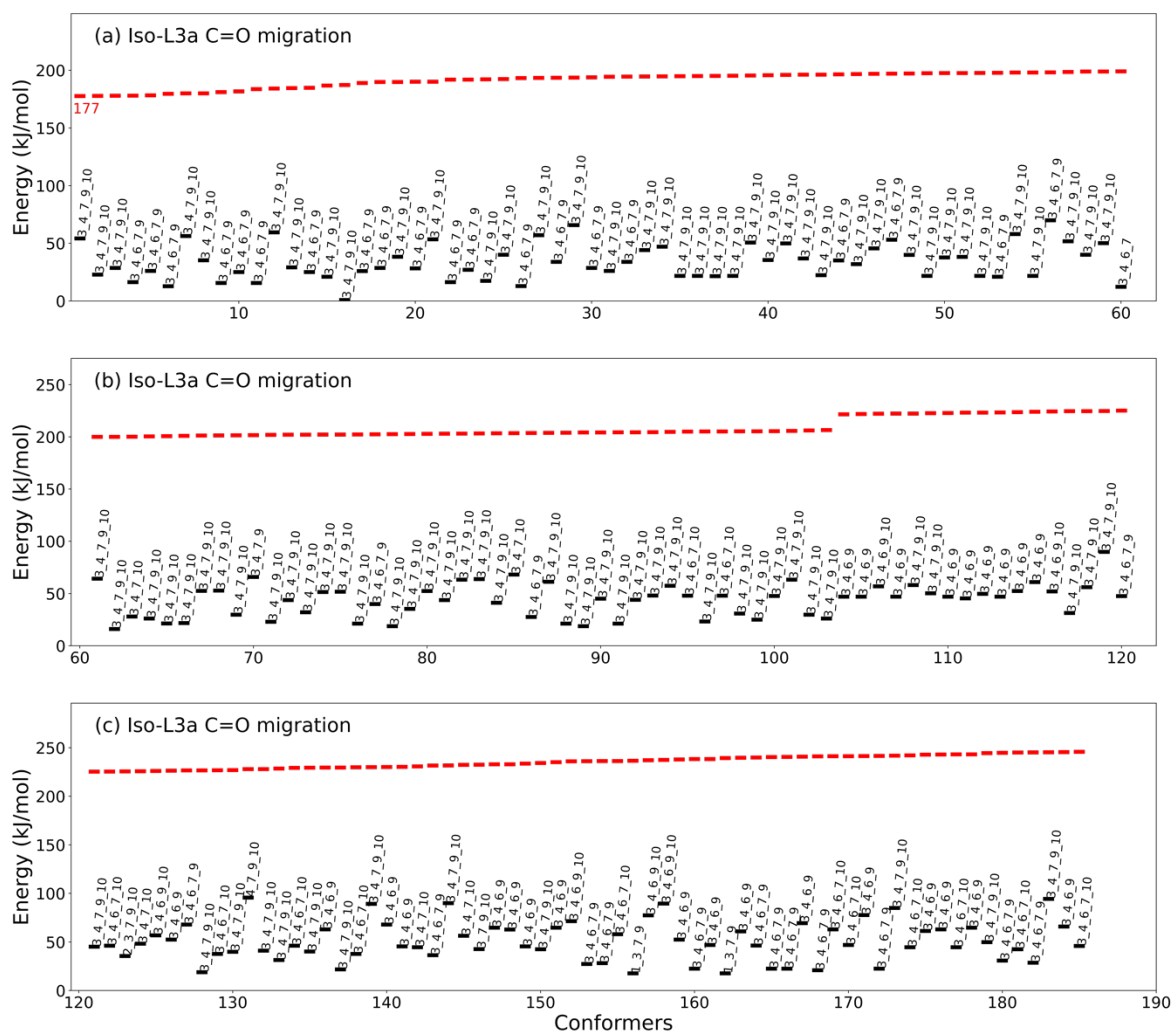

Figure S24. Calculated zero-point corrected energies of TSs and reactants of Iso-L3a for C=O migration. The red lines represent the TS energies of C-C bond. The black lines right below each TS represent the energies of the reactant states leading to the TSs, where the numbers above the black line represent the numberings of the O atoms that bind to sodium ion.

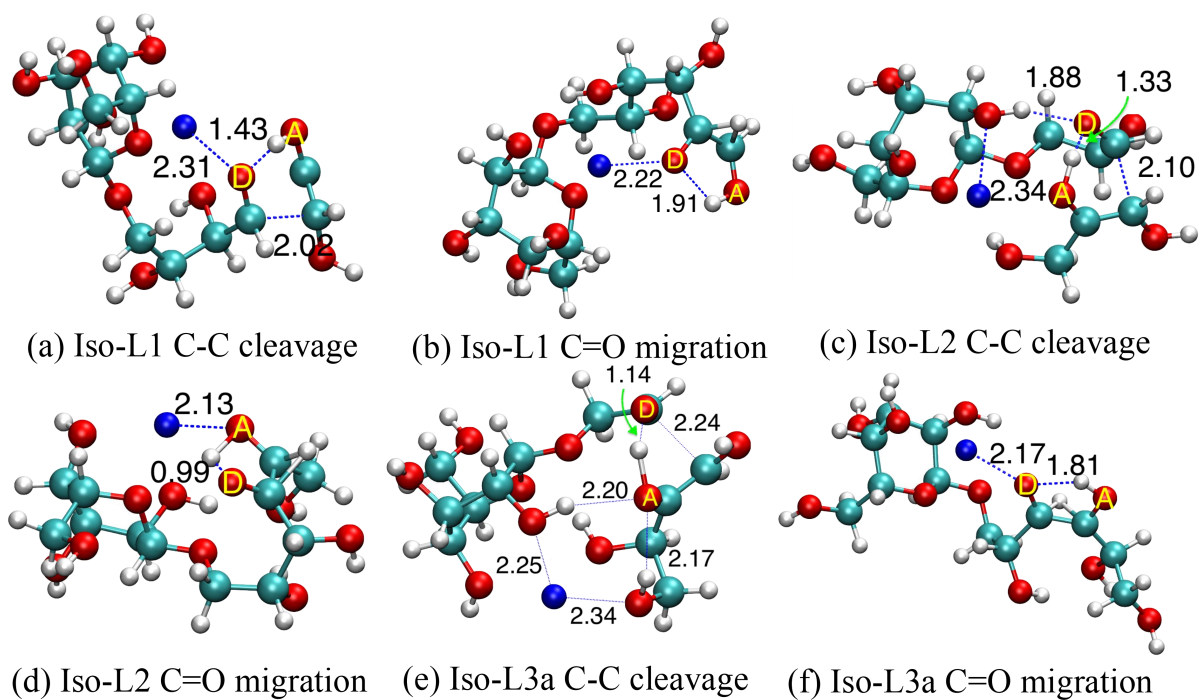

Figure S25. Geometries of the lowest TSs of C-C bond cleavage and C=O migration for the isomaltose linear forms.

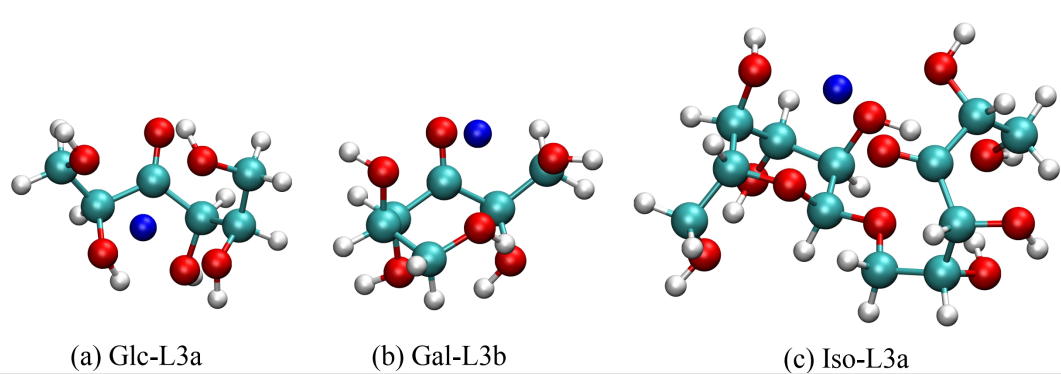

Figure S26. Geometries of the global minimum for linear forms of glucose and mannose, galactose and isomaltose, which form belongs to (a) Glc-L3a, (b) Gal-L3b and (a) Iso-L3a, respectively.

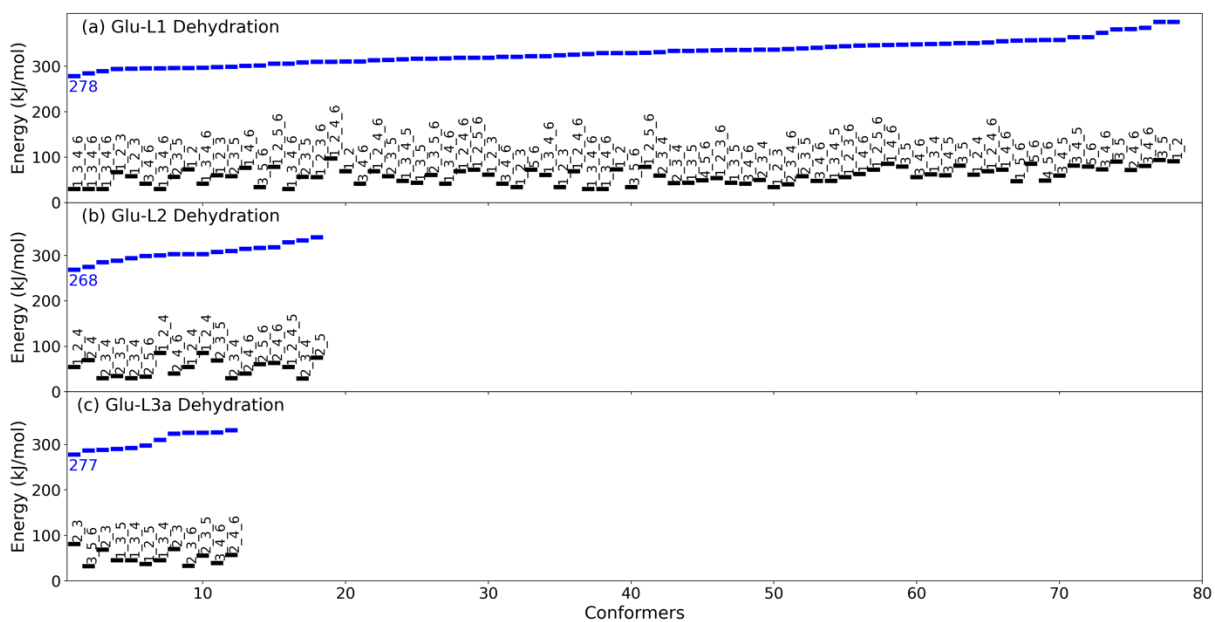

Figure S27. Calculated zero-point corrected energies of TSs and reactants of dehydration reactions for glucose in linear forms. The blue lines represent the TS energies of dehydration reactions. The black lines right below each TS represent the energies of the reactant states leading to the TSs, where the numbers above the black line represent the numberings of the O atoms that bind to sodium ion.

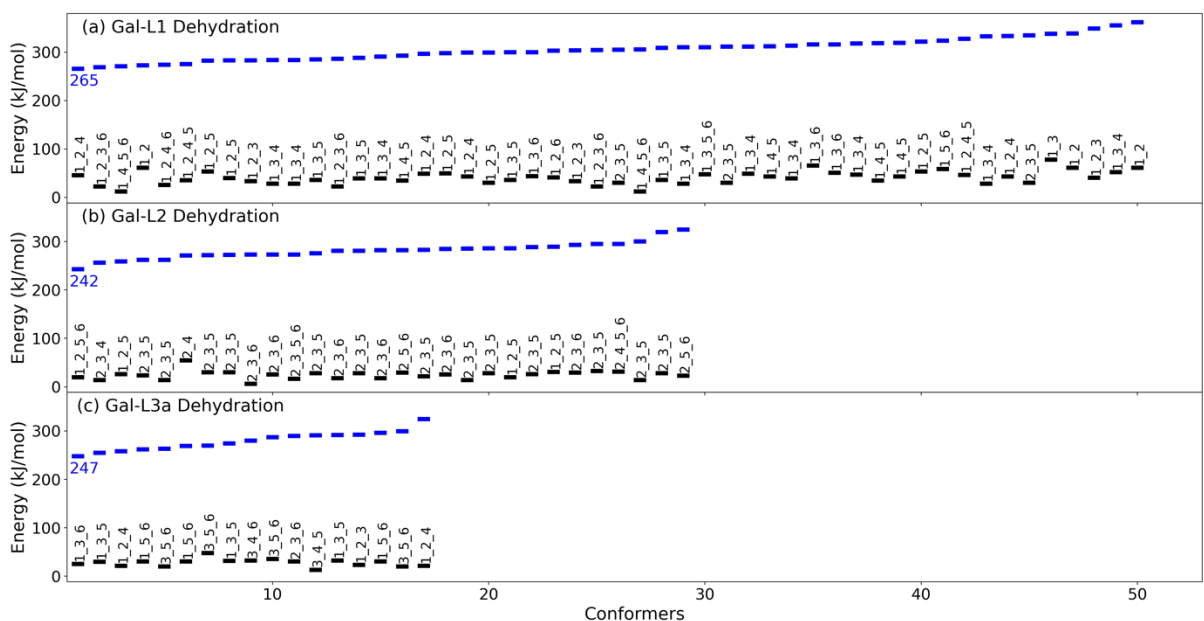

Figure S28. Calculated zero-point corrected energies of TSs and reactants of dehydration reactions for galactose in linear forms. The blue lines represent the TS energies of dehydration reactions. The black lines right below each TS represent the energies of the reactant states leading to the TSs, where the numbers above the black line represent the numberings of the O atoms that bind to sodium ion.

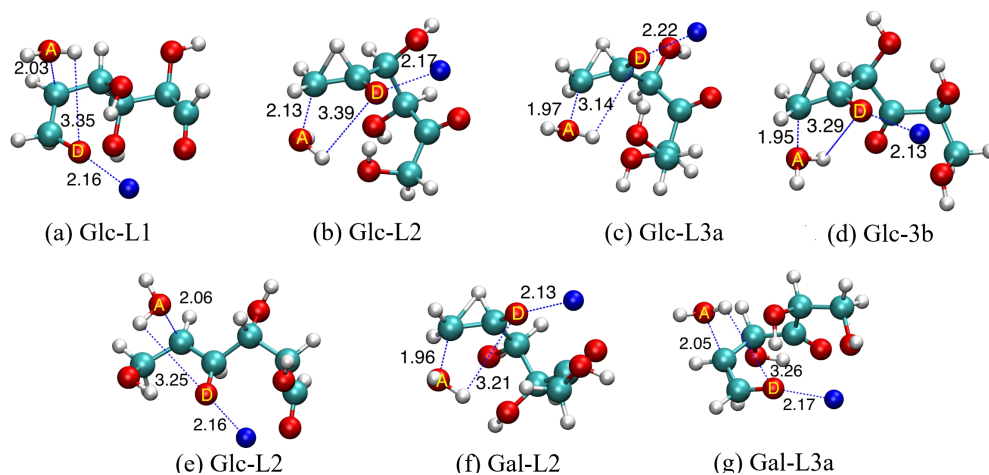

Figure S29. Geometries of the lowest TSs of dehydration for the series of linear structures.

### Reference:

1. Huynh, H. T.; Tsai, S.-T.; Hsu, P.-J.; Biswas, A.; Phan, H. T.; Kuo, J.-L.; Ni, C.-K.; Chiu, C.- Collision-Induced Dissociation of Na<sup>+</sup>-Tagged Ketohexoses: Experimental and Computational Studies on Fructose. *Phys. Chem. Chem. Phys.* **2022**, *24* (35), 20856-20866

1. The global minimum glucose linear forms: Glu-L3a

25

|    |           |           |           |
|----|-----------|-----------|-----------|
| C  | -2.58345  | 0.372459  | 0.272447  |
| C  | -1.339479 | 1.173685  | -0.050122 |
| C  | -0.206353 | 0.871889  | 0.946168  |
| O  | -0.434972 | 0.462322  | 2.053606  |
| C  | 1.247879  | 1.13115   | 0.524268  |
| C  | 2.016908  | -0.132813 | 0.072606  |
| C  | 1.753984  | -1.371103 | 0.918448  |
| O  | 0.458373  | -1.885315 | 0.621034  |
| O  | 1.675812  | -0.473244 | -1.265551 |
| O  | 1.30831   | 2.07422   | -0.540733 |
| O  | -0.953772 | 0.851104  | -1.377347 |
| O  | -2.272355 | -1.003737 | 0.031417  |
| H  | 3.083693  | 0.108981  | 0.126037  |
| H  | -3.394977 | 0.696964  | -0.382344 |
| H  | 1.741304  | 1.512758  | 1.422651  |
| H  | 2.484197  | -2.136533 | 0.654261  |
| H  | 1.852789  | -1.138912 | 1.980543  |
| H  | 1.66416   | 2.914535  | -0.23887  |
| H  | -0.134802 | -1.74898  | 1.366788  |
| H  | 2.021155  | 0.211275  | -1.848791 |
| H  | -3.013751 | -1.54882  | 0.310125  |
| H  | -2.85457  | 0.528997  | 1.317804  |
| H  | -0.272957 | 1.480156  | -1.650245 |
| H  | -1.581726 | 2.240165  | 0.038823  |
| Na | -0.471147 | -1.417726 | -1.398097 |

## 2. The global minimum galactose linesr forms: Gal-L3b

25

|    |           |           |           |
|----|-----------|-----------|-----------|
| C  | -2.599146 | 0.344766  | -0.228663 |
| C  | -1.357574 | 1.219519  | -0.234944 |
| C  | -0.220496 | 0.509003  | -0.983913 |
| O  | -0.458063 | -0.403297 | -1.741976 |
| C  | 1.22723   | 0.953211  | -0.791699 |
| C  | 2.055927  | -0.103705 | -0.005005 |
| C  | 1.62968   | -0.242981 | 1.44723   |
| O  | 0.34021   | -0.836126 | 1.505087  |
| O  | 1.902113  | -1.394477 | -0.581243 |
| O  | 1.271954  | 2.205686  | -0.136643 |
| O  | -1.010478 | 1.515882  | 1.103164  |
| O  | -2.284946 | -0.907843 | 0.394115  |
| H  | 3.103435  | 0.215859  | -0.035605 |
| H  | -2.93692  | 0.170664  | -1.25101  |
| H  | 1.637581  | 1.020129  | -1.805236 |
| H  | 2.332649  | -0.904535 | 1.955307  |
| H  | 1.640904  | 0.730805  | 1.93978   |
| H  | 1.936426  | 2.778635  | -0.528713 |
| H  | -0.313065 | -0.151733 | 1.718387  |
| H  | 2.385096  | -1.456545 | -1.411233 |
| H  | -3.001887 | -1.157989 | 0.982052  |
| H  | -3.376886 | 0.863151  | 0.333042  |
| H  | -0.369085 | 2.238029  | 1.104167  |
| H  | -1.585895 | 2.137404  | -0.793355 |
| Na | -0.359308 | -2.18194  | -0.160513 |

### 3. The global minimum isomaltose linesr forms: Iso-L3b

46

|    |           |           |           |
|----|-----------|-----------|-----------|
| O  | 0.321239  | 1.02582   | 0.531308  |
| O  | -0.531745 | -1.456411 | 1.036146  |
| O  | -3.718963 | 0.001802  | 1.903922  |
| O  | -2.601532 | -2.067846 | -0.902006 |
| O  | -1.353357 | 0.494314  | -0.900659 |
| O  | -3.760762 | 2.057396  | 0.08095   |
| C  | -1.048432 | 0.821463  | 0.46115   |
| C  | -1.377154 | -0.365912 | 1.364631  |
| C  | -2.838538 | -0.811469 | 1.180549  |
| C  | -3.226814 | -0.919733 | -0.310058 |
| C  | -2.733411 | 0.245921  | -1.17751  |
| C  | -3.593283 | 1.500412  | -1.217405 |
| H  | 0.37214   | -1.271704 | 1.35284   |
| H  | -3.852245 | 0.846016  | 1.441571  |
| H  | -2.92488  | -2.868032 | -0.469284 |
| H  | -4.361961 | 2.811371  | 0.047463  |
| H  | -1.600473 | 1.724722  | 0.75331   |
| H  | -1.250438 | -0.067835 | 2.411866  |
| H  | -2.915871 | -1.814015 | 1.617713  |
| H  | -4.31827  | -1.003975 | -0.382041 |
| H  | -2.739313 | -0.123811 | -2.209674 |
| H  | -3.100437 | 2.221957  | -1.878714 |
| H  | -4.56448  | 1.22865   | -1.64912  |
| O  | 2.115544  | -0.885478 | 1.879872  |
| O  | 1.883605  | -2.434748 | -0.53508  |
| O  | 1.357742  | -0.278159 | -1.807519 |
| O  | 4.378498  | 0.999599  | -0.606711 |
| O  | 2.725635  | 1.897043  | 1.320292  |
| C  | 3.251431  | -1.27971  | 1.110285  |
| C  | 2.862032  | -1.422562 | -0.357463 |
| C  | 2.318781  | -0.178364 | -1.072254 |
| C  | 3.033058  | 1.161852  | -0.970228 |
| C  | 2.324748  | 2.1546    | -0.004999 |
| C  | 0.806745  | 2.18741   | -0.134778 |
| H  | 2.198745  | 1.153934  | 1.661439  |
| H  | 2.28703   | -1.061582 | 2.813869  |
| H  | 2.264983  | -3.298594 | -0.338142 |
| H  | 4.508459  | 1.413013  | 0.26061   |
| H  | 4.057227  | -0.549924 | 1.211695  |
| H  | 3.789248  | -1.663501 | -0.901584 |
| H  | 2.976112  | 1.582826  | -1.982106 |
| H  | 2.717333  | 3.145914  | -0.255503 |
| H  | 0.415923  | 3.08236   | 0.364555  |
| H  | 0.501156  | 2.180155  | -1.186808 |
| H  | 3.615876  | -2.255008 | 1.454578  |
| Na | -0.298006 | -1.709369 | -1.215834 |

#### 4. Transition States of 1st Glu-L1 C-C cleavage

25

|    |           |           |           |
|----|-----------|-----------|-----------|
| C  | -2.534556 | -0.371417 | -0.608413 |
| C  | -2.512518 | 0.584601  | 0.396326  |
| C  | -0.630536 | 0.233051  | 0.914068  |
| O  | -0.490121 | -1.028932 | 1.11529   |
| C  | 0.192992  | 0.885615  | -0.182905 |
| C  | 1.616764  | 1.245584  | 0.293581  |
| C  | 2.379226  | 0.143705  | 1.023254  |
| O  | 2.639427  | -0.964504 | 0.162184  |
| O  | 2.341498  | 1.568756  | -0.890804 |
| O  | 0.244464  | -0.02567  | -1.276454 |
| O  | -2.570152 | 1.907046  | 0.031256  |
| O  | -2.339143 | -1.62189  | -0.33341  |
| H  | 1.537596  | 2.1097    | 0.961465  |
| H  | -2.572817 | -0.090656 | -1.659179 |
| H  | -2.881939 | 0.307734  | 1.37985   |
| H  | -0.768107 | 0.885398  | 1.786064  |
| H  | -0.294961 | 1.813485  | -0.497107 |
| H  | -3.337239 | 2.339414  | 0.419985  |
| H  | 3.323956  | 0.549548  | 1.394322  |
| H  | 1.812114  | -0.239391 | 1.871642  |
| H  | 0.777489  | 0.395017  | -1.963801 |
| H  | -1.753419 | -1.644748 | 0.507459  |
| H  | 3.268665  | -0.668137 | -0.505326 |
| H  | 2.728726  | 2.446156  | -0.836866 |
| Na | 0.771264  | -2.109892 | -0.394406 |



## 5. Reactant of 1st Glu-L1 C-C cleavage

25

|    |           |           |           |
|----|-----------|-----------|-----------|
| C  | -2.534556 | -0.371417 | -0.608413 |
| C  | -2.512518 | 0.584601  | 0.396326  |
| C  | -0.630536 | 0.233051  | 0.914068  |
| O  | -0.490121 | -1.028932 | 1.11529   |
| C  | 0.192992  | 0.885615  | -0.182905 |
| C  | 1.616764  | 1.245584  | 0.293581  |
| C  | 2.379226  | 0.143705  | 1.023254  |
| O  | 2.639427  | -0.964504 | 0.162184  |
| O  | 2.341498  | 1.568756  | -0.890804 |
| O  | 0.244464  | -0.02567  | -1.276454 |
| O  | -2.570152 | 1.907046  | 0.031256  |
| O  | -2.339143 | -1.62189  | -0.33341  |
| H  | 1.537596  | 2.1097    | 0.961465  |
| H  | -2.572817 | -0.090656 | -1.659179 |
| H  | -2.881939 | 0.307734  | 1.37985   |
| H  | -0.768107 | 0.885398  | 1.786064  |
| H  | -0.294961 | 1.813485  | -0.497107 |
| H  | -3.337239 | 2.339414  | 0.419985  |
| H  | 3.323956  | 0.549548  | 1.394322  |
| H  | 1.812114  | -0.239391 | 1.871642  |
| H  | 0.777489  | 0.395017  | -1.963801 |
| H  | -1.753419 | -1.644748 | 0.507459  |
| H  | 3.268665  | -0.668137 | -0.505326 |
| H  | 2.728726  | 2.446156  | -0.836866 |
| Na | 0.771264  | -2.109892 | -0.394406 |

## 6. Transition States of 2nd Glu-L1 C-C cleavage

25

|    |           |           |           |
|----|-----------|-----------|-----------|
| C  | 2.534757  | 0.371582  | -0.608651 |
| C  | 2.512481  | -0.584316 | 0.396284  |
| C  | 0.630869  | -0.233174 | 0.914269  |
| O  | 0.490042  | 1.028755  | 1.115551  |
| C  | -0.192683 | -0.885838 | -0.1827   |
| C  | -1.616729 | -1.245729 | 0.293576  |
| C  | -2.378949 | -0.143801 | 1.023258  |
| O  | -2.640017 | 0.96383   | 0.161608  |
| O  | -2.3437   | -1.567554 | -0.889865 |
| O  | -0.244247 | 0.02555   | -1.276093 |
| O  | 2.570352  | -1.906847 | 0.031283  |
| O  | 2.33933   | 1.622111  | -0.334    |
| H  | -1.538335 | -2.109904 | 0.961423  |
| H  | 2.573282  | 0.090652  | -1.659359 |
| H  | 2.882266  | -0.307376 | 1.379663  |
| H  | 0.768158  | -0.885486 | 1.786357  |
| H  | 0.295505  | -1.813605 | -0.496946 |
| H  | 3.338295  | -2.338709 | 0.418897  |
| H  | -3.323299 | -0.549853 | 1.394885  |
| H  | -1.811363 | 0.239939  | 1.871003  |
| H  | -0.779682 | -0.394046 | -1.96224  |
| H  | 1.754442  | 1.64539   | 0.50723   |
| H  | -3.271547 | 0.667605  | -0.5038   |
| H  | -2.711458 | -2.453809 | -0.8457   |
| Na | -0.77171  | 2.11001   | -0.394136 |

## 7. Reactant of 2nd Glu-L1 C-C cleavage

25

|    |           |           |           |
|----|-----------|-----------|-----------|
| C  | 2.534757  | 0.371582  | -0.608651 |
| C  | 2.512481  | -0.584316 | 0.396284  |
| C  | 0.630869  | -0.233174 | 0.914269  |
| O  | 0.490042  | 1.028755  | 1.115551  |
| C  | -0.192683 | -0.885838 | -0.1827   |
| C  | -1.616729 | -1.245729 | 0.293576  |
| C  | -2.378949 | -0.143801 | 1.023258  |
| O  | -2.640017 | 0.96383   | 0.161608  |
| O  | -2.3437   | -1.567554 | -0.889865 |
| O  | -0.244247 | 0.02555   | -1.276093 |
| O  | 2.570352  | -1.906847 | 0.031283  |
| O  | 2.33933   | 1.622111  | -0.334    |
| H  | -1.538335 | -2.109904 | 0.961423  |
| H  | 2.573282  | 0.090652  | -1.659359 |
| H  | 2.882266  | -0.307376 | 1.379663  |
| H  | 0.768158  | -0.885486 | 1.786357  |
| H  | 0.295505  | -1.813605 | -0.496946 |
| H  | 3.338295  | -2.338709 | 0.418897  |
| H  | -3.323299 | -0.549853 | 1.394885  |
| H  | -1.811363 | 0.239939  | 1.871003  |
| H  | -0.779682 | -0.394046 | -1.96224  |
| H  | 1.754442  | 1.64539   | 0.50723   |
| H  | -3.271547 | 0.667605  | -0.5038   |
| H  | -2.711458 | -2.453809 | -0.8457   |
| Na | -0.77171  | 2.11001   | -0.394136 |

## 8. Transition States of 3rd Glu-L1 C-C cleavage

25

|    |           |           |           |
|----|-----------|-----------|-----------|
| C  | -2.540314 | -1.341107 | -0.30611  |
| C  | -2.095122 | -0.803081 | 0.890124  |
| C  | -0.336025 | -0.508512 | -0.16891  |
| O  | -0.668648 | 0.324587  | -1.106657 |
| C  | 0.494573  | 0.088777  | 0.981319  |
| C  | 1.996196  | 0.109418  | 0.626818  |
| C  | 2.668477  | -1.254813 | 0.55862   |
| O  | 2.274412  | -1.840969 | -0.673639 |
| O  | 2.197355  | 0.807839  | -0.597471 |
| O  | 0.151759  | 1.447969  | 1.189471  |
| O  | -2.417316 | 0.48132   | 1.229368  |
| O  | -2.86399  | -0.539837 | -1.263562 |
| H  | 2.46951   | 0.697062  | 1.417543  |
| H  | -2.474753 | -2.414186 | -0.488096 |
| H  | -1.830508 | -1.431038 | 1.731528  |
| H  | -0.034815 | -1.518883 | -0.452542 |
| H  | 0.377427  | -0.490951 | 1.901852  |
| H  | -3.044367 | 0.827553  | 0.577485  |
| H  | 3.751615  | -1.109891 | 0.588846  |
| H  | 2.369963  | -1.870052 | 1.413274  |
| H  | -0.760671 | 1.479369  | 1.512012  |
| H  | -1.89026  | 0.021547  | -1.416877 |
| H  | 2.841244  | -2.587192 | -0.887546 |
| H  | 2.31174   | 0.13602   | -1.286496 |
| Na | 0.490782  | 2.279025  | -0.938384 |

## 9. Reactant of 3rd Glu-L1 C-C cleavage

25

|    |           |           |           |
|----|-----------|-----------|-----------|
| C  | -2.540314 | -1.341107 | -0.30611  |
| C  | -2.095122 | -0.803081 | 0.890124  |
| C  | -0.336025 | -0.508512 | -0.16891  |
| O  | -0.668648 | 0.324587  | -1.106657 |
| C  | 0.494573  | 0.088777  | 0.981319  |
| C  | 1.996196  | 0.109418  | 0.626818  |
| C  | 2.668477  | -1.254813 | 0.55862   |
| O  | 2.274412  | -1.840969 | -0.673639 |
| O  | 2.197355  | 0.807839  | -0.597471 |
| O  | 0.151759  | 1.447969  | 1.189471  |
| O  | -2.417316 | 0.48132   | 1.229368  |
| O  | -2.86399  | -0.539837 | -1.263562 |
| H  | 2.46951   | 0.697062  | 1.417543  |
| H  | -2.474753 | -2.414186 | -0.488096 |
| H  | -1.830508 | -1.431038 | 1.731528  |
| H  | -0.034815 | -1.518883 | -0.452542 |
| H  | 0.377427  | -0.490951 | 1.901852  |
| H  | -3.044367 | 0.827553  | 0.577485  |
| H  | 3.751615  | -1.109891 | 0.588846  |
| H  | 2.369963  | -1.870052 | 1.413274  |
| H  | -0.760671 | 1.479369  | 1.512012  |
| H  | -1.89026  | 0.021547  | -1.416877 |
| H  | 2.841244  | -2.587192 | -0.887546 |
| H  | 2.31174   | 0.13602   | -1.286496 |
| Na | 0.490782  | 2.279025  | -0.938384 |

## 10. Transition States of 4th Glu-L1 C-C cleavage

25

|    |           |           |           |
|----|-----------|-----------|-----------|
| C  | 2.797231  | 0.130675  | 0.26945   |
| C  | 2.218281  | 1.208199  | -0.381298 |
| C  | 0.461375  | 0.31069   | -0.708572 |
| O  | 0.684528  | -0.837161 | -1.22727  |
| C  | -0.233343 | 0.378234  | 0.648988  |
| C  | -1.753558 | 0.219956  | 0.543884  |
| C  | -2.447446 | 1.252377  | -0.329243 |
| O  | -3.809612 | 0.873761  | -0.283712 |
| O  | -2.035196 | -1.085528 | 0.046572  |
| O  | 0.296472  | -0.702896 | 1.418427  |
| O  | 1.934881  | 2.3365    | 0.353851  |
| O  | 2.944926  | -1.006679 | -0.327531 |
| H  | -2.169982 | 0.306731  | 1.556365  |
| H  | 3.024946  | 0.168059  | 1.333485  |
| H  | 2.392638  | 1.323239  | -1.44716  |
| H  | 0.191382  | 1.141786  | -1.370691 |
| H  | -0.009103 | 1.342374  | 1.114596  |
| H  | 2.444983  | 3.090187  | 0.039975  |
| H  | -2.286098 | 2.257398  | 0.075422  |
| H  | -2.066914 | 1.203444  | -1.355377 |
| H  | 0.119815  | -0.55634  | 2.353028  |
| H  | 2.186876  | -1.08536  | -1.009448 |
| H  | -4.341307 | 1.439159  | -0.849828 |
| H  | -2.977687 | -1.102291 | -0.170618 |
| Na | -0.262981 | -2.468468 | -0.033792 |

## 11. Reactant of 4th Glu-L1 C-C cleavage

25

|    |           |           |           |
|----|-----------|-----------|-----------|
| C  | 2.797231  | 0.130675  | 0.26945   |
| C  | 2.218281  | 1.208199  | -0.381298 |
| C  | 0.461375  | 0.31069   | -0.708572 |
| O  | 0.684528  | -0.837161 | -1.22727  |
| C  | -0.233343 | 0.378234  | 0.648988  |
| C  | -1.753558 | 0.219956  | 0.543884  |
| C  | -2.447446 | 1.252377  | -0.329243 |
| O  | -3.809612 | 0.873761  | -0.283712 |
| O  | -2.035196 | -1.085528 | 0.046572  |
| O  | 0.296472  | -0.702896 | 1.418427  |
| O  | 1.934881  | 2.3365    | 0.353851  |
| O  | 2.944926  | -1.006679 | -0.327531 |
| H  | -2.169982 | 0.306731  | 1.556365  |
| H  | 3.024946  | 0.168059  | 1.333485  |
| H  | 2.392638  | 1.323239  | -1.44716  |
| H  | 0.191382  | 1.141786  | -1.370691 |
| H  | -0.009103 | 1.342374  | 1.114596  |
| H  | 2.444983  | 3.090187  | 0.039975  |
| H  | -2.286098 | 2.257398  | 0.075422  |
| H  | -2.066914 | 1.203444  | -1.355377 |
| H  | 0.119815  | -0.55634  | 2.353028  |
| H  | 2.186876  | -1.08536  | -1.009448 |
| H  | -4.341307 | 1.439159  | -0.849828 |
| H  | -2.977687 | -1.102291 | -0.170618 |
| Na | -0.262981 | -2.468468 | -0.033792 |

## 12. Transition States of 1st Glu-L1 C=O Migration

25

|    |           |           |           |
|----|-----------|-----------|-----------|
| C  | -2.85358  | 0.298166  | 0.083878  |
| C  | -1.432283 | 0.059342  | 0.050178  |
| C  | -0.520683 | 1.060901  | 0.784535  |
| O  | -0.023803 | 0.501836  | 1.981921  |
| C  | 0.672735  | 1.599221  | -0.023846 |
| C  | 1.830337  | 0.679592  | -0.451184 |
| C  | 2.520294  | -0.144465 | 0.632255  |
| O  | 1.775164  | -1.286666 | 1.017276  |
| O  | 1.422273  | -0.210115 | -1.48205  |
| O  | 0.099868  | 2.138897  | -1.210756 |
| O  | -1.111048 | -1.178979 | -0.154291 |
| O  | -3.600913 | -0.693109 | -0.234962 |
| H  | 2.592288  | 1.361117  | -0.853913 |
| H  | -3.333713 | 1.259557  | 0.242161  |
| H  | -1.728425 | 0.703123  | -0.963278 |
| H  | -1.123403 | 1.951841  | 0.999523  |
| H  | 1.108894  | 2.387842  | 0.598629  |
| H  | -2.977006 | -1.465354 | -0.284943 |
| H  | 3.463163  | -0.513713 | 0.227508  |
| H  | 2.743844  | 0.489419  | 1.494858  |
| H  | 0.452965  | 3.012859  | -1.399317 |
| H  | -0.697828 | 0.499293  | 2.66856   |
| H  | 1.070756  | -0.983695 | 1.608481  |
| H  | 1.014541  | 0.317487  | -2.179353 |
| Na | 0.692788  | -2.228294 | -0.722811 |



### 13. Reactant of 1st Glu-L1 C=O Migration

25

|    |           |           |           |
|----|-----------|-----------|-----------|
| C  | -2.85358  | 0.298166  | 0.083878  |
| C  | -1.432283 | 0.059342  | 0.050178  |
| C  | -0.520683 | 1.060901  | 0.784535  |
| O  | -0.023803 | 0.501836  | 1.981921  |
| C  | 0.672735  | 1.599221  | -0.023846 |
| C  | 1.830337  | 0.679592  | -0.451184 |
| C  | 2.520294  | -0.144465 | 0.632255  |
| O  | 1.775164  | -1.286666 | 1.017276  |
| O  | 1.422273  | -0.210115 | -1.48205  |
| O  | 0.099868  | 2.138897  | -1.210756 |
| O  | -1.111048 | -1.178979 | -0.154291 |
| O  | -3.600913 | -0.693109 | -0.234962 |
| H  | 2.592288  | 1.361117  | -0.853913 |
| H  | -3.333713 | 1.259557  | 0.242161  |
| H  | -1.728425 | 0.703123  | -0.963278 |
| H  | -1.123403 | 1.951841  | 0.999523  |
| H  | 1.108894  | 2.387842  | 0.598629  |
| H  | -2.977006 | -1.465354 | -0.284943 |
| H  | 3.463163  | -0.513713 | 0.227508  |
| H  | 2.743844  | 0.489419  | 1.494858  |
| H  | 0.452965  | 3.012859  | -1.399317 |
| H  | -0.697828 | 0.499293  | 2.66856   |
| H  | 1.070756  | -0.983695 | 1.608481  |
| H  | 1.014541  | 0.317487  | -2.179353 |
| Na | 0.692788  | -2.228294 | -0.722811 |

#### 14. Transition States of 2nd Glu-L1 C=O Migration

25

|    |           |           |           |
|----|-----------|-----------|-----------|
| C  | 2.73998   | -1.270738 | -0.501821 |
| C  | 1.743881  | -0.235984 | -0.386097 |
| C  | 0.31008   | -0.603997 | 0.003956  |
| O  | 0.243667  | -0.306997 | 1.387481  |
| C  | -0.730416 | 0.193631  | -0.800454 |
| C  | -2.146341 | -0.397329 | -0.812733 |
| C  | -2.807922 | -0.554564 | 0.553492  |
| O  | -2.109576 | -1.555953 | 1.291614  |
| O  | -2.874719 | 0.551331  | -1.572551 |
| O  | -0.77774  | 1.519542  | -0.289698 |
| O  | 2.210008  | 0.940357  | -0.127266 |
| O  | 3.96069   | -0.880533 | -0.492957 |
| H  | -2.109118 | -1.373414 | -1.311172 |
| H  | 2.544971  | -2.319803 | -0.70321  |
| H  | 1.826518  | -0.580933 | -1.584867 |
| H  | 0.140916  | -1.672662 | -0.176142 |
| H  | -0.407389 | 0.219781  | -1.848683 |
| H  | 3.919759  | 0.082339  | -0.252582 |
| H  | -2.791753 | 0.401789  | 1.084957  |
| H  | -3.849544 | -0.848996 | 0.401174  |
| H  | -1.461086 | 1.990015  | -0.785346 |
| H  | -0.526063 | -0.784523 | 1.741541  |
| H  | -2.705676 | -2.010546 | 1.892498  |
| H  | -3.722894 | 0.199066  | -1.855944 |
| Na | 0.842467  | 1.979071  | 1.226067  |

15. Reactant of 2nd Glu-L1 C=O Migration

25

|    |           |           |           |
|----|-----------|-----------|-----------|
| C  | 2.73998   | -1.270738 | -0.501821 |
| C  | 1.743881  | -0.235984 | -0.386097 |
| C  | 0.31008   | -0.603997 | 0.003956  |
| O  | 0.243667  | -0.306997 | 1.387481  |
| C  | -0.730416 | 0.193631  | -0.800454 |
| C  | -2.146341 | -0.397329 | -0.812733 |
| C  | -2.807922 | -0.554564 | 0.553492  |
| O  | -2.109576 | -1.555953 | 1.291614  |
| O  | -2.874719 | 0.551331  | -1.572551 |
| O  | -0.77774  | 1.519542  | -0.289698 |
| O  | 2.210008  | 0.940357  | -0.127266 |
| O  | 3.96069   | -0.880533 | -0.492957 |
| H  | -2.109118 | -1.373414 | -1.311172 |
| H  | 2.544971  | -2.319803 | -0.70321  |
| H  | 1.826518  | -0.580933 | -1.584867 |
| H  | 0.140916  | -1.672662 | -0.176142 |
| H  | -0.407389 | 0.219781  | -1.848683 |
| H  | 3.919759  | 0.082339  | -0.252582 |
| H  | -2.791753 | 0.401789  | 1.084957  |
| H  | -3.849544 | -0.848996 | 0.401174  |
| H  | -1.461086 | 1.990015  | -0.785346 |
| H  | -0.526063 | -0.784523 | 1.741541  |
| H  | -2.705676 | -2.010546 | 1.892498  |
| H  | -3.722894 | 0.199066  | -1.855944 |
| Na | 0.842467  | 1.979071  | 1.226067  |

## 16. Transition States of 3rd Glu-L1 C=O Migration

25

|    |           |           |           |
|----|-----------|-----------|-----------|
| C  | 2.826022  | -1.029236 | 0.004034  |
| C  | 1.588521  | -0.304856 | -0.055834 |
| C  | 0.581208  | -0.377712 | 1.095529  |
| O  | 0.607149  | 0.917305  | 1.681846  |
| C  | -0.815713 | -0.8084   | 0.610242  |
| C  | -1.369844 | -0.01996  | -0.589901 |
| C  | -2.730301 | -0.539318 | -1.020192 |
| O  | -3.591337 | -0.288038 | 0.082521  |
| O  | -1.494123 | 1.3661    | -0.26448  |
| O  | -0.641214 | -2.162832 | 0.233114  |
| O  | 1.589273  | 0.727443  | -0.844585 |
| O  | 3.731519  | -0.681053 | -0.835707 |
| H  | -0.669809 | -0.096105 | -1.424457 |
| H  | 3.011378  | -1.910653 | 0.610559  |
| H  | 1.42158   | -1.395628 | -0.623512 |
| H  | 0.902698  | -1.134719 | 1.818071  |
| H  | -1.514557 | -0.712904 | 1.449606  |
| H  | 3.389823  | 0.149476  | -1.255448 |
| H  | -3.054315 | 0.012032  | -1.907713 |
| H  | -2.676641 | -1.603539 | -1.264187 |
| H  | -1.410374 | -2.686484 | 0.47247   |
| H  | 0.205667  | 0.882791  | 2.555419  |
| H  | -4.506782 | -0.449704 | -0.159619 |
| H  | -2.357392 | 1.478017  | 0.157334  |
| Na | 0.46993   | 2.446628  | -0.101224 |

## 17. Reactant of 3rd Glu-L1 C=O Migration

25

|    |           |           |           |
|----|-----------|-----------|-----------|
| C  | 2.826022  | -1.029236 | 0.004034  |
| C  | 1.588521  | -0.304856 | -0.055834 |
| C  | 0.581208  | -0.377712 | 1.095529  |
| O  | 0.607149  | 0.917305  | 1.681846  |
| C  | -0.815713 | -0.8084   | 0.610242  |
| C  | -1.369844 | -0.01996  | -0.589901 |
| C  | -2.730301 | -0.539318 | -1.020192 |
| O  | -3.591337 | -0.288038 | 0.082521  |
| O  | -1.494123 | 1.3661    | -0.26448  |
| O  | -0.641214 | -2.162832 | 0.233114  |
| O  | 1.589273  | 0.727443  | -0.844585 |
| O  | 3.731519  | -0.681053 | -0.835707 |
| H  | -0.669809 | -0.096105 | -1.424457 |
| H  | 3.011378  | -1.910653 | 0.610559  |
| H  | 1.42158   | -1.395628 | -0.623512 |
| H  | 0.902698  | -1.134719 | 1.818071  |
| H  | -1.514557 | -0.712904 | 1.449606  |
| H  | 3.389823  | 0.149476  | -1.255448 |
| H  | -3.054315 | 0.012032  | -1.907713 |
| H  | -2.676641 | -1.603539 | -1.264187 |
| H  | -1.410374 | -2.686484 | 0.47247   |
| H  | 0.205667  | 0.882791  | 2.555419  |
| H  | -4.506782 | -0.449704 | -0.159619 |
| H  | -2.357392 | 1.478017  | 0.157334  |
| Na | 0.46993   | 2.446628  | -0.101224 |

## 18. Transition States of 4th Glu-L1 C=O Migration

25

|    |           |           |           |
|----|-----------|-----------|-----------|
| C  | -2.443265 | 0.103965  | 0.700938  |
| C  | -1.570182 | 0.008845  | -0.447818 |
| C  | -0.736006 | 1.226448  | -0.859459 |
| O  | -1.280776 | 2.336349  | -0.176305 |
| C  | 0.770655  | 1.127329  | -0.575037 |
| C  | 1.221169  | 0.858083  | 0.865777  |
| C  | 0.91901   | -0.511209 | 1.472707  |
| O  | 1.618863  | -1.553861 | 0.800357  |
| O  | 2.645406  | 0.974036  | 0.828265  |
| O  | 1.355978  | 0.20466   | -1.49031  |
| O  | -1.197863 | -1.20263  | -0.739415 |
| O  | -2.869951 | -1.014188 | 1.160882  |
| H  | 0.770614  | 1.629253  | 1.499814  |
| H  | -2.851255 | 1.02203   | 1.108451  |
| H  | -2.675158 | 0.307359  | -0.875974 |
| H  | -0.825218 | 1.331333  | -1.945186 |
| H  | 1.1523    | 2.128907  | -0.809507 |
| H  | -2.365416 | -1.705759 | 0.653722  |
| H  | 1.21485   | -0.492126 | 2.525495  |
| H  | -0.137384 | -0.765355 | 1.425673  |
| H  | 2.303472  | 0.38754   | -1.496005 |
| H  | -1.219134 | 3.131735  | -0.712543 |
| H  | 2.55997   | -1.402612 | 0.946962  |
| H  | 2.958929  | 1.634263  | 1.451278  |
| Na | 0.724718  | -2.003842 | -1.252966 |

19. Reactant of 4th Glu-L1 C=O Migration

25

|    |           |           |           |
|----|-----------|-----------|-----------|
| C  | -2.443265 | 0.103965  | 0.700938  |
| C  | -1.570182 | 0.008845  | -0.447818 |
| C  | -0.736006 | 1.226448  | -0.859459 |
| O  | -1.280776 | 2.336349  | -0.176305 |
| C  | 0.770655  | 1.127329  | -0.575037 |
| C  | 1.221169  | 0.858083  | 0.865777  |
| C  | 0.91901   | -0.511209 | 1.472707  |
| O  | 1.618863  | -1.553861 | 0.800357  |
| O  | 2.645406  | 0.974036  | 0.828265  |
| O  | 1.355978  | 0.20466   | -1.49031  |
| O  | -1.197863 | -1.20263  | -0.739415 |
| O  | -2.869951 | -1.014188 | 1.160882  |
| H  | 0.770614  | 1.629253  | 1.499814  |
| H  | -2.851255 | 1.02203   | 1.108451  |
| H  | -2.675158 | 0.307359  | -0.875974 |
| H  | -0.825218 | 1.331333  | -1.945186 |
| H  | 1.1523    | 2.128907  | -0.809507 |
| H  | -2.365416 | -1.705759 | 0.653722  |
| H  | 1.21485   | -0.492126 | 2.525495  |
| H  | -0.137384 | -0.765355 | 1.425673  |
| H  | 2.303472  | 0.38754   | -1.496005 |
| H  | -1.219134 | 3.131735  | -0.712543 |
| H  | 2.55997   | -1.402612 | 0.946962  |
| H  | 2.958929  | 1.634263  | 1.451278  |
| Na | 0.724718  | -2.003842 | -1.252966 |

## 20. Transition States of 1st Glu-L2 C-C cleavage

25

|    |           |           |           |
|----|-----------|-----------|-----------|
| C  | -1.247893 | -1.686779 | 0.609806  |
| C  | -1.610671 | -0.287232 | 0.177743  |
| C  | -1.358482 | 0.866752  | 0.918288  |
| O  | -0.707462 | 0.754384  | 2.140271  |
| C  | -0.177214 | 1.817708  | -0.470143 |
| C  | 1.253312  | 1.287427  | -0.542376 |
| C  | 1.98226   | 0.935779  | 0.744236  |
| O  | 1.59075   | -0.33933  | 1.243701  |
| O  | 1.303688  | 0.164926  | -1.406216 |
| O  | -0.835978 | 1.714036  | -1.560492 |
| O  | -2.110127 | -0.186103 | -1.002738 |
| O  | -0.542663 | -2.37078  | -0.415938 |
| H  | 1.803014  | 2.12707   | -0.996996 |
| H  | -2.183602 | -2.207277 | 0.843633  |
| H  | -2.058052 | 1.688963  | 0.817912  |
| H  | -0.272487 | 2.731757  | 0.128373  |
| H  | 3.05267   | 0.883745  | 0.53822   |
| H  | 1.820222  | 1.71526   | 1.492149  |
| H  | -1.699637 | 0.744506  | -1.437318 |
| H  | -1.238467 | 1.12487   | 2.852705  |
| H  | 0.910892  | -0.190017 | 1.914231  |
| H  | 0.748502  | 0.379086  | -2.170783 |
| H  | -1.112547 | -2.416754 | -1.193505 |
| H  | -0.630967 | -1.691259 | 1.504004  |
| Na | 1.656993  | -1.85354  | -0.446059 |



21. Reactant of 1st Glu-L2 C-C cleavage

25

|    |           |           |           |
|----|-----------|-----------|-----------|
| C  | -1.247893 | -1.686779 | 0.609806  |
| C  | -1.610671 | -0.287232 | 0.177743  |
| C  | -1.358482 | 0.866752  | 0.918288  |
| O  | -0.707462 | 0.754384  | 2.140271  |
| C  | -0.177214 | 1.817708  | -0.470143 |
| C  | 1.253312  | 1.287427  | -0.542376 |
| C  | 1.98226   | 0.935779  | 0.744236  |
| O  | 1.59075   | -0.33933  | 1.243701  |
| O  | 1.303688  | 0.164926  | -1.406216 |
| O  | -0.835978 | 1.714036  | -1.560492 |
| O  | -2.110127 | -0.186103 | -1.002738 |
| O  | -0.542663 | -2.37078  | -0.415938 |
| H  | 1.803014  | 2.12707   | -0.996996 |
| H  | -2.183602 | -2.207277 | 0.843633  |
| H  | -2.058052 | 1.688963  | 0.817912  |
| H  | -0.272487 | 2.731757  | 0.128373  |
| H  | 3.05267   | 0.883745  | 0.53822   |
| H  | 1.820222  | 1.71526   | 1.492149  |
| H  | -1.699637 | 0.744506  | -1.437318 |
| H  | -1.238467 | 1.12487   | 2.852705  |
| H  | 0.910892  | -0.190017 | 1.914231  |
| H  | 0.748502  | 0.379086  | -2.170783 |
| H  | -1.112547 | -2.416754 | -1.193505 |
| H  | -0.630967 | -1.691259 | 1.504004  |
| Na | 1.656993  | -1.85354  | -0.446059 |

## 22. Transition States of 2nd Glu-L2 C-C cleavage

25

|    |           |           |           |
|----|-----------|-----------|-----------|
| C  | 0.955775  | -1.581452 | 1.015749  |
| C  | 0.839886  | -1.197444 | -0.435586 |
| C  | -0.312757 | -1.308981 | -1.21339  |
| O  | -1.468904 | -1.902057 | -0.834991 |
| C  | -0.522903 | 0.740936  | -1.361723 |
| C  | -1.164455 | 1.367219  | -0.122856 |
| C  | -2.457256 | 0.752178  | 0.401618  |
| O  | -2.102706 | -0.333448 | 1.268369  |
| O  | -0.209797 | 1.491099  | 0.914834  |
| O  | 0.642617  | 1.21096   | -1.661123 |
| O  | 1.873988  | -0.617143 | -0.965495 |
| O  | 1.616255  | -0.527466 | 1.716409  |
| H  | -1.408846 | 2.382077  | -0.463588 |
| H  | 1.551669  | -2.500073 | 1.050525  |
| H  | -0.148544 | -1.374453 | -2.284188 |
| H  | -1.229499 | 0.551886  | -2.177791 |
| H  | -3.002949 | 1.5058    | 0.971432  |
| H  | -3.079676 | 0.400656  | -0.425573 |
| H  | 1.451417  | 0.22282   | -1.570134 |
| H  | -1.708424 | -1.648044 | 0.07005   |
| H  | -2.815094 | -0.49978  | 1.894176  |
| H  | -0.41623  | 0.832792  | 1.593535  |
| H  | 2.066429  | -0.888347 | 2.485778  |
| H  | -0.023188 | -1.782744 | 1.453047  |
| Na | 1.99287   | 1.41701   | 0.38144   |

23. Reactant of 2nd Glu-L2 C-C cleavage

25

|    |           |           |           |
|----|-----------|-----------|-----------|
| C  | 0.955775  | -1.581452 | 1.015749  |
| C  | 0.839886  | -1.197444 | -0.435586 |
| C  | -0.312757 | -1.308981 | -1.21339  |
| O  | -1.468904 | -1.902057 | -0.834991 |
| C  | -0.522903 | 0.740936  | -1.361723 |
| C  | -1.164455 | 1.367219  | -0.122856 |
| C  | -2.457256 | 0.752178  | 0.401618  |
| O  | -2.102706 | -0.333448 | 1.268369  |
| O  | -0.209797 | 1.491099  | 0.914834  |
| O  | 0.642617  | 1.21096   | -1.661123 |
| O  | 1.873988  | -0.617143 | -0.965495 |
| O  | 1.616255  | -0.527466 | 1.716409  |
| H  | -1.408846 | 2.382077  | -0.463588 |
| H  | 1.551669  | -2.500073 | 1.050525  |
| H  | -0.148544 | -1.374453 | -2.284188 |
| H  | -1.229499 | 0.551886  | -2.177791 |
| H  | -3.002949 | 1.5058    | 0.971432  |
| H  | -3.079676 | 0.400656  | -0.425573 |
| H  | 1.451417  | 0.22282   | -1.570134 |
| H  | -1.708424 | -1.648044 | 0.07005   |
| H  | -2.815094 | -0.49978  | 1.894176  |
| H  | -0.41623  | 0.832792  | 1.593535  |
| H  | 2.066429  | -0.888347 | 2.485778  |
| H  | -0.023188 | -1.782744 | 1.453047  |
| Na | 1.99287   | 1.41701   | 0.38144   |

## 24. Transition States of 3rd Glu-L2 C-C cleavage

25

|    |           |           |           |
|----|-----------|-----------|-----------|
| C  | 0.958125  | 1.581624  | -1.01518  |
| C  | 0.841664  | 1.197082  | 0.43588   |
| C  | -0.311379 | 1.308073  | 1.213447  |
| O  | -1.466922 | 1.902483  | 0.835083  |
| C  | -0.522772 | -0.74047  | 1.361269  |
| C  | -1.165709 | -1.366251 | 0.122826  |
| C  | -2.458562 | -0.749731 | -0.400073 |
| O  | -2.103599 | 0.335199  | -1.267654 |
| O  | -0.212238 | -1.489904 | -0.916038 |
| O  | 0.642611  | -1.211884 | 1.659797  |
| O  | 1.875296  | 0.616094  | 0.965494  |
| O  | 1.618277  | 0.527383  | -1.715575 |
| H  | -1.410489 | -2.381109 | 0.463211  |
| H  | 1.554633  | 2.499895  | -1.04961  |
| H  | -0.146989 | 1.373925  | 2.2842    |
| H  | -1.228813 | -0.552055 | 2.177973  |
| H  | -3.006398 | -1.502569 | -0.968842 |
| H  | -3.079108 | -0.39683  | 0.427892  |
| H  | 1.452653  | -0.223647 | 1.570033  |
| H  | -1.706944 | 1.64863   | -0.069876 |
| H  | -2.815404 | 0.500677  | -1.89434  |
| H  | -0.420011 | -0.831482 | -1.594207 |
| H  | 2.062885  | 0.886807  | -2.48886  |
| H  | -0.020672 | 1.783734  | -1.452592 |
| Na | 1.989914  | -1.420263 | -0.382078 |

25. Reactant of 3rd Glu-L2 C-C cleavage

25

|    |           |           |           |
|----|-----------|-----------|-----------|
| C  | 0.958125  | 1.581624  | -1.01518  |
| C  | 0.841664  | 1.197082  | 0.43588   |
| C  | -0.311379 | 1.308073  | 1.213447  |
| O  | -1.466922 | 1.902483  | 0.835083  |
| C  | -0.522772 | -0.74047  | 1.361269  |
| C  | -1.165709 | -1.366251 | 0.122826  |
| C  | -2.458562 | -0.749731 | -0.400073 |
| O  | -2.103599 | 0.335199  | -1.267654 |
| O  | -0.212238 | -1.489904 | -0.916038 |
| O  | 0.642611  | -1.211884 | 1.659797  |
| O  | 1.875296  | 0.616094  | 0.965494  |
| O  | 1.618277  | 0.527383  | -1.715575 |
| H  | -1.410489 | -2.381109 | 0.463211  |
| H  | 1.554633  | 2.499895  | -1.04961  |
| H  | -0.146989 | 1.373925  | 2.2842    |
| H  | -1.228813 | -0.552055 | 2.177973  |
| H  | -3.006398 | -1.502569 | -0.968842 |
| H  | -3.079108 | -0.39683  | 0.427892  |
| H  | 1.452653  | -0.223647 | 1.570033  |
| H  | -1.706944 | 1.64863   | -0.069876 |
| H  | -2.815404 | 0.500677  | -1.89434  |
| H  | -0.420011 | -0.831482 | -1.594207 |
| H  | 2.062885  | 0.886807  | -2.48886  |
| H  | -0.020672 | 1.783734  | -1.452592 |
| Na | 1.989914  | -1.420263 | -0.382078 |

## 26. Transition States of 4th Glu-L2 C-C cleavage

25

|    |           |           |           |
|----|-----------|-----------|-----------|
| C  | 1.025773  | 1.555284  | -0.964066 |
| C  | 0.847496  | 1.154564  | 0.477714  |
| C  | -0.338333 | 1.284272  | 1.192734  |
| O  | -1.434131 | 1.899753  | 0.623133  |
| C  | -0.639425 | -0.781155 | 1.352969  |
| C  | -1.206203 | -1.366071 | 0.066311  |
| C  | -2.471148 | -0.730514 | -0.524303 |
| O  | -2.121976 | 0.279162  | -1.45007  |
| O  | -0.188683 | -1.414807 | -0.917589 |
| O  | 0.507     | -1.244279 | 1.713674  |
| O  | 1.827573  | 0.530779  | 1.045977  |
| O  | 1.808266  | 0.557082  | -1.609332 |
| H  | -1.44801  | -2.397874 | 0.357878  |
| H  | 1.548117  | 2.519045  | -0.964814 |
| H  | -0.258246 | 1.341565  | 2.273438  |
| H  | -1.382618 | -0.57788  | 2.13285   |
| H  | -3.017349 | -1.492553 | -1.080433 |
| H  | -3.119476 | -0.354024 | 0.271133  |
| H  | 1.341119  | -0.302187 | 1.632005  |
| H  | -1.762639 | 2.605477  | 1.189803  |
| H  | -2.118262 | 1.123147  | -0.984434 |
| H  | -0.461781 | -0.808064 | -1.625147 |
| H  | 2.220819  | 0.928317  | -2.394385 |
| H  | 0.05831   | 1.678308  | -1.452723 |
| Na | 1.991515  | -1.438462 | -0.382697 |

27. Reactant of 4th Glu-L2 C-C cleavage

25

|    |           |           |           |
|----|-----------|-----------|-----------|
| C  | 1.025773  | 1.555284  | -0.964066 |
| C  | 0.847496  | 1.154564  | 0.477714  |
| C  | -0.338333 | 1.284272  | 1.192734  |
| O  | -1.434131 | 1.899753  | 0.623133  |
| C  | -0.639425 | -0.781155 | 1.352969  |
| C  | -1.206203 | -1.366071 | 0.066311  |
| C  | -2.471148 | -0.730514 | -0.524303 |
| O  | -2.121976 | 0.279162  | -1.45007  |
| O  | -0.188683 | -1.414807 | -0.917589 |
| O  | 0.507     | -1.244279 | 1.713674  |
| O  | 1.827573  | 0.530779  | 1.045977  |
| O  | 1.808266  | 0.557082  | -1.609332 |
| H  | -1.44801  | -2.397874 | 0.357878  |
| H  | 1.548117  | 2.519045  | -0.964814 |
| H  | -0.258246 | 1.341565  | 2.273438  |
| H  | -1.382618 | -0.57788  | 2.13285   |
| H  | -3.017349 | -1.492553 | -1.080433 |
| H  | -3.119476 | -0.354024 | 0.271133  |
| H  | 1.341119  | -0.302187 | 1.632005  |
| H  | -1.762639 | 2.605477  | 1.189803  |
| H  | -2.118262 | 1.123147  | -0.984434 |
| H  | -0.461781 | -0.808064 | -1.625147 |
| H  | 2.220819  | 0.928317  | -2.394385 |
| H  | 0.05831   | 1.678308  | -1.452723 |
| Na | 1.991515  | -1.438462 | -0.382697 |

## 28. Transition States of 1st Glu-L2 C=O Migration

25

|    |           |           |           |
|----|-----------|-----------|-----------|
| C  | 3.106448  | 0.632834  | 0.142012  |
| C  | 2.166396  | -0.514267 | -0.079262 |
| C  | 0.725621  | -0.528268 | -0.062114 |
| O  | 0.189489  | -1.680582 | -0.287468 |
| C  | -0.114951 | 0.569731  | 0.607751  |
| C  | -1.003205 | 1.332161  | -0.389798 |
| C  | -1.783434 | 0.463539  | -1.373823 |
| O  | -2.753849 | -0.336556 | -0.701485 |
| O  | -1.943099 | 2.049361  | 0.406146  |
| O  | -0.910246 | -0.109876 | 1.572753  |
| O  | 2.717734  | -1.643344 | -0.396339 |
| O  | 2.411688  | 1.835964  | -0.084421 |
| H  | -0.352994 | 2.010245  | -0.953022 |
| H  | 3.956042  | 0.50009   | -0.534221 |
| H  | 1.190304  | 0.030391  | -1.113753 |
| H  | 0.528561  | 1.2938    | 1.107432  |
| H  | -2.280264 | 1.108167  | -2.103994 |
| H  | -1.12674  | -0.222839 | -1.909498 |
| H  | -1.451488 | 0.567476  | 1.99855   |
| H  | 1.977558  | -2.299711 | -0.415756 |
| H  | -3.405289 | 0.263704  | -0.320739 |
| H  | -1.949698 | 2.98305   | 0.181734  |
| H  | 3.022685  | 2.576307  | -0.027617 |
| H  | 3.469571  | 0.550333  | 1.175073  |
| Na | -1.804841 | -2.001376 | 0.524883  |



29. Reactant of 1st Glu-L2 C=O Migration

25

|    |           |           |           |
|----|-----------|-----------|-----------|
| C  | 3.106448  | 0.632834  | 0.142012  |
| C  | 2.166396  | -0.514267 | -0.079262 |
| C  | 0.725621  | -0.528268 | -0.062114 |
| O  | 0.189489  | -1.680582 | -0.287468 |
| C  | -0.114951 | 0.569731  | 0.607751  |
| C  | -1.003205 | 1.332161  | -0.389798 |
| C  | -1.783434 | 0.463539  | -1.373823 |
| O  | -2.753849 | -0.336556 | -0.701485 |
| O  | -1.943099 | 2.049361  | 0.406146  |
| O  | -0.910246 | -0.109876 | 1.572753  |
| O  | 2.717734  | -1.643344 | -0.396339 |
| O  | 2.411688  | 1.835964  | -0.084421 |
| H  | -0.352994 | 2.010245  | -0.953022 |
| H  | 3.956042  | 0.50009   | -0.534221 |
| H  | 1.190304  | 0.030391  | -1.113753 |
| H  | 0.528561  | 1.2938    | 1.107432  |
| H  | -2.280264 | 1.108167  | -2.103994 |
| H  | -1.12674  | -0.222839 | -1.909498 |
| H  | -1.451488 | 0.567476  | 1.99855   |
| H  | 1.977558  | -2.299711 | -0.415756 |
| H  | -3.405289 | 0.263704  | -0.320739 |
| H  | -1.949698 | 2.98305   | 0.181734  |
| H  | 3.022685  | 2.576307  | -0.027617 |
| H  | 3.469571  | 0.550333  | 1.175073  |
| Na | -1.804841 | -2.001376 | 0.524883  |

### 30. Transition States of 2nd Glu-L2 C=O Migration

25

|    |           |           |           |
|----|-----------|-----------|-----------|
| C  | 2.920737  | -0.105282 | 0.81733   |
| C  | 1.865658  | 0.803688  | 0.242595  |
| C  | 0.484045  | 0.473412  | -0.025896 |
| O  | -0.154055 | 1.373163  | -0.693454 |
| C  | 0.099084  | -1.014549 | -0.003295 |
| C  | -1.391612 | -1.322273 | 0.177312  |
| C  | -2.04604  | -0.785805 | 1.434006  |
| O  | -2.178904 | 0.634001  | 1.337502  |
| O  | -2.138516 | -0.867537 | -0.943777 |
| O  | 0.421165  | -1.588491 | -1.247951 |
| O  | 2.212066  | 1.997982  | -0.102906 |
| O  | 3.029418  | -1.178379 | -0.103318 |
| H  | -1.455881 | -2.415269 | 0.231846  |
| H  | 2.63669   | -0.462004 | 1.811518  |
| H  | 0.641946  | 0.764234  | 1.197981  |
| H  | 0.640705  | -1.514578 | 0.810434  |
| H  | -3.031592 | -1.246963 | 1.535463  |
| H  | -1.436502 | -1.057289 | 2.302028  |
| H  | 1.381478  | -1.670615 | -1.310861 |
| H  | 1.425391  | 2.348106  | -0.60127  |
| H  | -2.555902 | 0.971624  | 2.154951  |
| H  | -1.727355 | -1.253304 | -1.729205 |
| H  | 3.885352  | -1.608272 | -0.013051 |
| H  | 3.845292  | 0.469495  | 0.894524  |
| Na | -2.306386 | 1.401252  | -0.827767 |

31. Reactant of 2nd Glu-L2 C=O Migration

25

|    |           |           |           |
|----|-----------|-----------|-----------|
| C  | 2.920737  | -0.105282 | 0.81733   |
| C  | 1.865658  | 0.803688  | 0.242595  |
| C  | 0.484045  | 0.473412  | -0.025896 |
| O  | -0.154055 | 1.373163  | -0.693454 |
| C  | 0.099084  | -1.014549 | -0.003295 |
| C  | -1.391612 | -1.322273 | 0.177312  |
| C  | -2.04604  | -0.785805 | 1.434006  |
| O  | -2.178904 | 0.634001  | 1.337502  |
| O  | -2.138516 | -0.867537 | -0.943777 |
| O  | 0.421165  | -1.588491 | -1.247951 |
| O  | 2.212066  | 1.997982  | -0.102906 |
| O  | 3.029418  | -1.178379 | -0.103318 |
| H  | -1.455881 | -2.415269 | 0.231846  |
| H  | 2.63669   | -0.462004 | 1.811518  |
| H  | 0.641946  | 0.764234  | 1.197981  |
| H  | 0.640705  | -1.514578 | 0.810434  |
| H  | -3.031592 | -1.246963 | 1.535463  |
| H  | -1.436502 | -1.057289 | 2.302028  |
| H  | 1.381478  | -1.670615 | -1.310861 |
| H  | 1.425391  | 2.348106  | -0.60127  |
| H  | -2.555902 | 0.971624  | 2.154951  |
| H  | -1.727355 | -1.253304 | -1.729205 |
| H  | 3.885352  | -1.608272 | -0.013051 |
| H  | 3.845292  | 0.469495  | 0.894524  |
| Na | -2.306386 | 1.401252  | -0.827767 |

## 32. Transition States of 3rd Glu-L2 C=O Migration

25

|    |           |           |           |
|----|-----------|-----------|-----------|
| C  | -2.969965 | -0.469081 | -0.143643 |
| C  | -1.931219 | 0.613857  | -0.062391 |
| C  | -0.5356   | 0.510453  | 0.24543   |
| O  | 0.117704  | 1.628759  | 0.274049  |
| C  | 0.05483   | -0.694251 | 0.981644  |
| C  | 1.392639  | -1.207655 | 0.413858  |
| C  | 1.396781  | -1.485877 | -1.077407 |
| O  | 1.412746  | -0.234425 | -1.779315 |
| O  | 2.456488  | -0.296704 | 0.686822  |
| O  | 0.253337  | -0.298721 | 2.320705  |
| O  | -2.35457  | 1.812459  | -0.344915 |
| O  | -2.344951 | -1.67831  | -0.50626  |
| H  | 1.596097  | -2.155574 | 0.922232  |
| H  | -3.718554 | -0.14828  | -0.873662 |
| H  | -0.82956  | 0.105493  | -0.935299 |
| H  | -0.65043  | -1.523914 | 0.976253  |
| H  | 2.287458  | -2.062692 | -1.33455  |
| H  | 0.500535  | -2.057897 | -1.339801 |
| H  | 0.453382  | 0.646171  | 2.324706  |
| H  | -1.612879 | 2.419662  | -0.116609 |
| H  | 1.418045  | -0.406266 | -2.72546  |
| H  | 2.64311   | -0.334888 | 1.631214  |
| H  | -3.005702 | -2.37464  | -0.566457 |
| H  | -3.446353 | -0.528757 | 0.843404  |
| Na | 2.144912  | 1.577495  | -0.559963 |

### 33. Reactant of 3rd Glu-L2 C=O Migration

25

|    |           |           |           |
|----|-----------|-----------|-----------|
| C  | -2.969965 | -0.469081 | -0.143643 |
| C  | -1.931219 | 0.613857  | -0.062391 |
| C  | -0.5356   | 0.510453  | 0.24543   |
| O  | 0.117704  | 1.628759  | 0.274049  |
| C  | 0.05483   | -0.694251 | 0.981644  |
| C  | 1.392639  | -1.207655 | 0.413858  |
| C  | 1.396781  | -1.485877 | -1.077407 |
| O  | 1.412746  | -0.234425 | -1.779315 |
| O  | 2.456488  | -0.296704 | 0.686822  |
| O  | 0.253337  | -0.298721 | 2.320705  |
| O  | -2.35457  | 1.812459  | -0.344915 |
| O  | -2.344951 | -1.67831  | -0.50626  |
| H  | 1.596097  | -2.155574 | 0.922232  |
| H  | -3.718554 | -0.14828  | -0.873662 |
| H  | -0.82956  | 0.105493  | -0.935299 |
| H  | -0.65043  | -1.523914 | 0.976253  |
| H  | 2.287458  | -2.062692 | -1.33455  |
| H  | 0.500535  | -2.057897 | -1.339801 |
| H  | 0.453382  | 0.646171  | 2.324706  |
| H  | -1.612879 | 2.419662  | -0.116609 |
| H  | 1.418045  | -0.406266 | -2.72546  |
| H  | 2.64311   | -0.334888 | 1.631214  |
| H  | -3.005702 | -2.37464  | -0.566457 |
| H  | -3.446353 | -0.528757 | 0.843404  |
| Na | 2.144912  | 1.577495  | -0.559963 |

### 34. Transition States of 4th Glu-L2 C=O Migration

25

|    |           |           |           |
|----|-----------|-----------|-----------|
| C  | 2.88152   | 0.01886   | 0.369191  |
| C  | 1.781692  | -0.8142   | -0.214946 |
| C  | 0.353612  | -0.680991 | -0.11607  |
| O  | -0.312797 | -1.588517 | -0.765298 |
| C  | -0.378241 | 0.099577  | 1.001119  |
| C  | -1.346537 | 1.164986  | 0.471998  |
| C  | -0.665089 | 2.362549  | -0.177775 |
| O  | -0.220474 | 1.928935  | -1.459962 |
| O  | -2.277939 | 0.586431  | -0.436587 |
| O  | -1.206941 | -0.835929 | 1.692122  |
| O  | 2.175802  | -1.750822 | -1.024525 |
| O  | 2.336952  | 1.199221  | 0.909462  |
| H  | -1.917073 | 1.512126  | 1.336599  |
| H  | 3.607302  | 0.216016  | -0.426126 |
| H  | 0.836986  | 0.210138  | -0.854145 |
| H  | 0.327069  | 0.573649  | 1.682525  |
| H  | -1.394845 | 3.169373  | -0.280303 |
| H  | 0.173718  | 2.699079  | 0.437705  |
| H  | -0.691735 | -1.323868 | 2.341266  |
| H  | 1.345827  | -2.239834 | -1.263097 |
| H  | 0.016614  | 2.682652  | -2.00714  |
| H  | -1.926953 | 0.740173  | -1.326318 |
| H  | 3.047554  | 1.751749  | 1.247564  |
| H  | 3.372228  | -0.600043 | 1.131328  |
| Na | -2.410479 | -1.691857 | -0.12206  |

35. Reactant of 4th Glu-L2 C=O Migration

25

|    |           |           |           |
|----|-----------|-----------|-----------|
| C  | 2.88152   | 0.01886   | 0.369191  |
| C  | 1.781692  | -0.8142   | -0.214946 |
| C  | 0.353612  | -0.680991 | -0.11607  |
| O  | -0.312797 | -1.588517 | -0.765298 |
| C  | -0.378241 | 0.099577  | 1.001119  |
| C  | -1.346537 | 1.164986  | 0.471998  |
| C  | -0.665089 | 2.362549  | -0.177775 |
| O  | -0.220474 | 1.928935  | -1.459962 |
| O  | -2.277939 | 0.586431  | -0.436587 |
| O  | -1.206941 | -0.835929 | 1.692122  |
| O  | 2.175802  | -1.750822 | -1.024525 |
| O  | 2.336952  | 1.199221  | 0.909462  |
| H  | -1.917073 | 1.512126  | 1.336599  |
| H  | 3.607302  | 0.216016  | -0.426126 |
| H  | 0.836986  | 0.210138  | -0.854145 |
| H  | 0.327069  | 0.573649  | 1.682525  |
| H  | -1.394845 | 3.169373  | -0.280303 |
| H  | 0.173718  | 2.699079  | 0.437705  |
| H  | -0.691735 | -1.323868 | 2.341266  |
| H  | 1.345827  | -2.239834 | -1.263097 |
| H  | 0.016614  | 2.682652  | -2.00714  |
| H  | -1.926953 | 0.740173  | -1.326318 |
| H  | 3.047554  | 1.751749  | 1.247564  |
| H  | 3.372228  | -0.600043 | 1.131328  |
| Na | -2.410479 | -1.691857 | -0.12206  |

### 36. Transition States of 1st Glu-L3a C-C cleavage

25

|    |           |           |           |
|----|-----------|-----------|-----------|
| C  | 2.183657  | 1.568777  | 0.223824  |
| C  | 1.159165  | 0.617872  | 0.822333  |
| C  | 0.24689   | 0.082552  | -0.273668 |
| O  | 0.5092    | -1.092679 | -0.779248 |
| C  | -0.908694 | 0.746451  | -0.604665 |
| C  | -1.962697 | -0.814449 | 0.485911  |
| C  | -3.313321 | -0.564489 | -0.148825 |
| O  | -3.624717 | 0.813989  | -0.082613 |
| O  | -1.413422 | -1.940691 | 0.247793  |
| O  | -1.150696 | 1.944915  | -0.019113 |
| O  | 1.887954  | -0.449445 | 1.422921  |
| O  | 2.947617  | 0.806974  | -0.718233 |
| H  | -1.797802 | -0.30998  | 1.447315  |
| H  | 2.831261  | 1.950257  | 1.016285  |
| H  | -1.433159 | 0.497984  | -1.522297 |
| H  | -3.304547 | -0.939409 | -1.176575 |
| H  | -4.027364 | -1.163116 | 0.430747  |
| H  | -2.106431 | 2.099659  | -0.045499 |
| H  | -4.568865 | 0.949192  | -0.197959 |
| H  | -0.389409 | -1.744333 | -0.346941 |
| H  | 3.531287  | 1.38968   | -1.211639 |
| H  | 1.663702  | 2.393159  | -0.269988 |
| H  | 1.365233  | -0.861855 | 2.117333  |
| H  | 0.567996  | 1.16985   | 1.557827  |
| Na | 2.726419  | -1.446898 | -0.490921 |



37. Reactant of 1st Glu-L3a C-C cleavage

25

|    |           |           |           |
|----|-----------|-----------|-----------|
| C  | 2.183657  | 1.568777  | 0.223824  |
| C  | 1.159165  | 0.617872  | 0.822333  |
| C  | 0.24689   | 0.082552  | -0.273668 |
| O  | 0.5092    | -1.092679 | -0.779248 |
| C  | -0.908694 | 0.746451  | -0.604665 |
| C  | -1.962697 | -0.814449 | 0.485911  |
| C  | -3.313321 | -0.564489 | -0.148825 |
| O  | -3.624717 | 0.813989  | -0.082613 |
| O  | -1.413422 | -1.940691 | 0.247793  |
| O  | -1.150696 | 1.944915  | -0.019113 |
| O  | 1.887954  | -0.449445 | 1.422921  |
| O  | 2.947617  | 0.806974  | -0.718233 |
| H  | -1.797802 | -0.30998  | 1.447315  |
| H  | 2.831261  | 1.950257  | 1.016285  |
| H  | -1.433159 | 0.497984  | -1.522297 |
| H  | -3.304547 | -0.939409 | -1.176575 |
| H  | -4.027364 | -1.163116 | 0.430747  |
| H  | -2.106431 | 2.099659  | -0.045499 |
| H  | -4.568865 | 0.949192  | -0.197959 |
| H  | -0.389409 | -1.744333 | -0.346941 |
| H  | 3.531287  | 1.38968   | -1.211639 |
| H  | 1.663702  | 2.393159  | -0.269988 |
| H  | 1.365233  | -0.861855 | 2.117333  |
| H  | 0.567996  | 1.16985   | 1.557827  |
| Na | 2.726419  | -1.446898 | -0.490921 |

### 38. Transition States of 2nd Glu-L3a C-C cleavage

25

|    |           |           |           |
|----|-----------|-----------|-----------|
| C  | 2.173754  | 1.587411  | 0.156559  |
| C  | 1.145913  | 0.658153  | 0.793937  |
| C  | 0.253423  | 0.070783  | -0.285731 |
| O  | 0.538156  | -1.111946 | -0.757648 |
| C  | -0.89758  | 0.724001  | -0.650281 |
| C  | -1.962184 | -0.846229 | 0.46079   |
| C  | -3.331291 | -0.543191 | -0.106062 |
| O  | -3.614125 | 0.836479  | 0.027724  |
| O  | -1.449186 | -1.9654   | 0.138958  |
| O  | -1.142985 | 1.94168   | -0.103141 |
| O  | 1.806852  | -0.431724 | 1.436034  |
| O  | 2.967455  | 0.774811  | -0.713997 |
| H  | -1.736057 | -0.387222 | 1.431907  |
| H  | 2.803692  | 2.038378  | 0.928944  |
| H  | -1.416126 | 0.444684  | -1.562574 |
| H  | -3.371901 | -0.876566 | -1.146953 |
| H  | -4.033015 | -1.151792 | 0.478392  |
| H  | -2.102771 | 2.07331   | -0.089732 |
| H  | -4.560124 | 0.990927  | -0.036931 |
| H  | -0.383526 | -1.766961 | -0.34898  |
| H  | 3.510782  | 1.332575  | -1.277167 |
| H  | 1.655356  | 2.373291  | -0.398751 |
| H  | 2.053159  | -0.186949 | 2.332274  |
| H  | 0.531907  | 1.228343  | 1.495272  |
| Na | 2.718825  | -1.488072 | -0.385856 |

39. Reactant of 2nd Glu-L3a C-C cleavage

25

|    |           |           |           |
|----|-----------|-----------|-----------|
| C  | 2.173754  | 1.587411  | 0.156559  |
| C  | 1.145913  | 0.658153  | 0.793937  |
| C  | 0.253423  | 0.070783  | -0.285731 |
| O  | 0.538156  | -1.111946 | -0.757648 |
| C  | -0.89758  | 0.724001  | -0.650281 |
| C  | -1.962184 | -0.846229 | 0.46079   |
| C  | -3.331291 | -0.543191 | -0.106062 |
| O  | -3.614125 | 0.836479  | 0.027724  |
| O  | -1.449186 | -1.9654   | 0.138958  |
| O  | -1.142985 | 1.94168   | -0.103141 |
| O  | 1.806852  | -0.431724 | 1.436034  |
| O  | 2.967455  | 0.774811  | -0.713997 |
| H  | -1.736057 | -0.387222 | 1.431907  |
| H  | 2.803692  | 2.038378  | 0.928944  |
| H  | -1.416126 | 0.444684  | -1.562574 |
| H  | -3.371901 | -0.876566 | -1.146953 |
| H  | -4.033015 | -1.151792 | 0.478392  |
| H  | -2.102771 | 2.07331   | -0.089732 |
| H  | -4.560124 | 0.990927  | -0.036931 |
| H  | -0.383526 | -1.766961 | -0.34898  |
| H  | 3.510782  | 1.332575  | -1.277167 |
| H  | 1.655356  | 2.373291  | -0.398751 |
| H  | 2.053159  | -0.186949 | 2.332274  |
| H  | 0.531907  | 1.228343  | 1.495272  |
| Na | 2.718825  | -1.488072 | -0.385856 |

40. Transition States of 3rd Glu-L3a C-C cleavage

25

|    |           |           |           |
|----|-----------|-----------|-----------|
| C  | 2.325314  | 1.466587  | 0.048919  |
| C  | 1.23466   | 0.679192  | 0.768103  |
| C  | 0.239041  | 0.130442  | -0.240069 |
| O  | 0.418318  | -1.081728 | -0.701779 |
| C  | -0.867153 | 0.861827  | -0.583991 |
| C  | -1.89927  | -0.638076 | 0.687712  |
| C  | -3.237559 | 0.04916   | 0.576019  |
| O  | -3.728431 | 0.081971  | -0.732378 |
| O  | -1.71579  | -1.715004 | 0.032357  |
| O  | -1.023473 | 2.107856  | -0.058359 |
| O  | 1.803731  | -0.441745 | 1.444728  |
| O  | 3.009086  | 0.541449  | -0.799643 |
| H  | -1.360446 | -0.482015 | 1.632543  |
| H  | 3.020839  | 1.894956  | 0.777224  |
| H  | -1.497367 | 0.568111  | -1.415507 |
| H  | -3.906938 | -0.49485  | 1.259387  |
| H  | -3.169608 | 1.073536  | 0.945024  |
| H  | -1.791384 | 2.537486  | -0.448249 |
| H  | -3.846325 | -0.821234 | -1.04661  |
| H  | -0.617702 | -1.652162 | -0.382437 |
| H  | 3.584626  | 1.016491  | -1.405182 |
| H  | 1.86604   | 2.270965  | -0.53154  |
| H  | 2.174832  | -0.16158  | 2.286613  |
| H  | 0.71665   | 1.34439   | 1.464161  |
| Na | 2.540824  | -1.666479 | -0.377726 |

41. Reactant of 3rd Glu-L3a C-C cleavage

25

|    |           |           |           |
|----|-----------|-----------|-----------|
| C  | 2.325314  | 1.466587  | 0.048919  |
| C  | 1.23466   | 0.679192  | 0.768103  |
| C  | 0.239041  | 0.130442  | -0.240069 |
| O  | 0.418318  | -1.081728 | -0.701779 |
| C  | -0.867153 | 0.861827  | -0.583991 |
| C  | -1.89927  | -0.638076 | 0.687712  |
| C  | -3.237559 | 0.04916   | 0.576019  |
| O  | -3.728431 | 0.081971  | -0.732378 |
| O  | -1.71579  | -1.715004 | 0.032357  |
| O  | -1.023473 | 2.107856  | -0.058359 |
| O  | 1.803731  | -0.441745 | 1.444728  |
| O  | 3.009086  | 0.541449  | -0.799643 |
| H  | -1.360446 | -0.482015 | 1.632543  |
| H  | 3.020839  | 1.894956  | 0.777224  |
| H  | -1.497367 | 0.568111  | -1.415507 |
| H  | -3.906938 | -0.49485  | 1.259387  |
| H  | -3.169608 | 1.073536  | 0.945024  |
| H  | -1.791384 | 2.537486  | -0.448249 |
| H  | -3.846325 | -0.821234 | -1.04661  |
| H  | -0.617702 | -1.652162 | -0.382437 |
| H  | 3.584626  | 1.016491  | -1.405182 |
| H  | 1.86604   | 2.270965  | -0.53154  |
| H  | 2.174832  | -0.16158  | 2.286613  |
| H  | 0.71665   | 1.34439   | 1.464161  |
| Na | 2.540824  | -1.666479 | -0.377726 |

## 42. Transition States of 4th Glu-L3a C-C cleavage

25

|    |           |           |           |
|----|-----------|-----------|-----------|
| C  | 2.325757  | 1.455509  | 0.041507  |
| C  | 1.284498  | 0.645872  | 0.800089  |
| C  | 0.243816  | 0.108163  | -0.176911 |
| O  | 0.380587  | -1.117771 | -0.614997 |
| C  | -0.852273 | 0.859267  | -0.514103 |
| C  | -1.971635 | -0.560648 | 0.720527  |
| C  | -3.305157 | 0.103989  | 0.467314  |
| O  | -3.706689 | 0.018119  | -0.868022 |
| O  | -1.752269 | -1.687357 | 0.167506  |
| O  | -0.964906 | 2.109852  | 0.018461  |
| O  | 1.978121  | -0.430207 | 1.425839  |
| O  | 2.946269  | 0.557328  | -0.884056 |
| H  | -1.509898 | -0.329153 | 1.691382  |
| H  | 3.064802  | 1.845013  | 0.745213  |
| H  | -1.484374 | 0.591472  | -1.354155 |
| H  | -4.013551 | -0.390994 | 1.148397  |
| H  | -3.270322 | 1.156351  | 0.752297  |
| H  | -1.670923 | 2.597464  | -0.416388 |
| H  | -3.789571 | -0.910915 | -1.110271 |
| H  | -0.646863 | -1.643208 | -0.27882  |
| H  | 3.53362   | 1.0447    | -1.468137 |
| H  | 1.832348  | 2.277642  | -0.482231 |
| H  | 1.537257  | -0.692189 | 2.238735  |
| H  | 0.80932   | 1.301006  | 1.534695  |
| Na | 2.564474  | -1.647256 | -0.453555 |

43. Reactant of 4th Glu-L3a C-C cleavage

25

|    |           |           |           |
|----|-----------|-----------|-----------|
| C  | 2.325757  | 1.455509  | 0.041507  |
| C  | 1.284498  | 0.645872  | 0.800089  |
| C  | 0.243816  | 0.108163  | -0.176911 |
| O  | 0.380587  | -1.117771 | -0.614997 |
| C  | -0.852273 | 0.859267  | -0.514103 |
| C  | -1.971635 | -0.560648 | 0.720527  |
| C  | -3.305157 | 0.103989  | 0.467314  |
| O  | -3.706689 | 0.018119  | -0.868022 |
| O  | -1.752269 | -1.687357 | 0.167506  |
| O  | -0.964906 | 2.109852  | 0.018461  |
| O  | 1.978121  | -0.430207 | 1.425839  |
| O  | 2.946269  | 0.557328  | -0.884056 |
| H  | -1.509898 | -0.329153 | 1.691382  |
| H  | 3.064802  | 1.845013  | 0.745213  |
| H  | -1.484374 | 0.591472  | -1.354155 |
| H  | -4.013551 | -0.390994 | 1.148397  |
| H  | -3.270322 | 1.156351  | 0.752297  |
| H  | -1.670923 | 2.597464  | -0.416388 |
| H  | -3.789571 | -0.910915 | -1.110271 |
| H  | -0.646863 | -1.643208 | -0.27882  |
| H  | 3.53362   | 1.0447    | -1.468137 |
| H  | 1.832348  | 2.277642  | -0.482231 |
| H  | 1.537257  | -0.692189 | 2.238735  |
| H  | 0.80932   | 1.301006  | 1.534695  |
| Na | 2.564474  | -1.647256 | -0.453555 |

#### 44. Transition States of 1st Glu-L3a C=O Migration

25

|    |           |           |           |
|----|-----------|-----------|-----------|
| C  | -3.374848 | 0.114908  | -0.224498 |
| C  | -2.025631 | -0.39362  | -0.72364  |
| C  | -0.93696  | 0.611404  | -0.441294 |
| O  | -1.149225 | 1.815809  | -0.876222 |
| C  | 0.299733  | 0.470053  | 0.290608  |
| C  | 0.975313  | -0.890394 | 0.588238  |
| C  | 1.536586  | -1.516184 | -0.676549 |
| O  | 2.493302  | -0.609078 | -1.228919 |
| O  | 2.084546  | -0.660915 | 1.448772  |
| O  | 1.033796  | 1.537336  | 0.295092  |
| O  | -1.714802 | -1.643103 | -0.169703 |
| O  | -3.263651 | 0.0745    | 1.187363  |
| H  | 0.276419  | -1.597599 | 1.02831   |
| H  | -4.154924 | -0.56241  | -0.583555 |
| H  | -0.695226 | 0.547801  | 1.071739  |
| H  | 2.018711  | -2.46033  | -0.411324 |
| H  | 0.721364  | -1.705378 | -1.379329 |
| H  | -0.306241 | 2.303683  | -0.673462 |
| H  | 2.854309  | -0.977902 | -2.039645 |
| H  | 1.786036  | -0.575899 | 2.359336  |
| H  | -4.090971 | 0.334036  | 1.601572  |
| H  | -3.558975 | 1.125252  | -0.596697 |
| H  | -2.213854 | -1.728428 | 0.654073  |
| H  | -2.060126 | -0.487708 | -1.815217 |
| Na | 3.155145  | 1.026499  | 0.241449  |



45. Reactant of 1st Glu-L3a C=O Migration

25

|    |           |           |           |
|----|-----------|-----------|-----------|
| C  | -3.374848 | 0.114908  | -0.224498 |
| C  | -2.025631 | -0.39362  | -0.72364  |
| C  | -0.93696  | 0.611404  | -0.441294 |
| O  | -1.149225 | 1.815809  | -0.876222 |
| C  | 0.299733  | 0.470053  | 0.290608  |
| C  | 0.975313  | -0.890394 | 0.588238  |
| C  | 1.536586  | -1.516184 | -0.676549 |
| O  | 2.493302  | -0.609078 | -1.228919 |
| O  | 2.084546  | -0.660915 | 1.448772  |
| O  | 1.033796  | 1.537336  | 0.295092  |
| O  | -1.714802 | -1.643103 | -0.169703 |
| O  | -3.263651 | 0.0745    | 1.187363  |
| H  | 0.276419  | -1.597599 | 1.02831   |
| H  | -4.154924 | -0.56241  | -0.583555 |
| H  | -0.695226 | 0.547801  | 1.071739  |
| H  | 2.018711  | -2.46033  | -0.411324 |
| H  | 0.721364  | -1.705378 | -1.379329 |
| H  | -0.306241 | 2.303683  | -0.673462 |
| H  | 2.854309  | -0.977902 | -2.039645 |
| H  | 1.786036  | -0.575899 | 2.359336  |
| H  | -4.090971 | 0.334036  | 1.601572  |
| H  | -3.558975 | 1.125252  | -0.596697 |
| H  | -2.213854 | -1.728428 | 0.654073  |
| H  | -2.060126 | -0.487708 | -1.815217 |
| Na | 3.155145  | 1.026499  | 0.241449  |

## 46. Transition States of 2nd Glu-L3a C=O Migration

25

|    |           |           |           |
|----|-----------|-----------|-----------|
| C  | -3.405392 | 0.120879  | -0.189553 |
| C  | -2.07407  | -0.409221 | -0.713928 |
| C  | -0.968156 | 0.588147  | -0.466225 |
| O  | -1.192633 | 1.794626  | -0.889783 |
| C  | 0.298461  | 0.448966  | 0.213305  |
| C  | 0.973894  | -0.90192  | 0.487858  |
| C  | 1.635123  | -1.460472 | -0.767609 |
| O  | 2.675646  | -0.565431 | -1.156141 |
| O  | 1.971655  | -0.630519 | 1.47209   |
| O  | 1.029079  | 1.517279  | 0.186765  |
| O  | -1.7722   | -1.659505 | -0.157529 |
| O  | -3.263408 | 0.086873  | 1.219558  |
| H  | 0.251399  | -1.629828 | 0.847597  |
| H  | -4.201465 | -0.54871  | -0.527491 |
| H  | -0.664138 | 0.522788  | 1.035182  |
| H  | 2.052241  | -2.44642  | -0.539665 |
| H  | 0.886949  | -1.567253 | -1.55869  |
| H  | -0.337894 | 2.277137  | -0.721582 |
| H  | 3.073981  | -0.869842 | -1.975899 |
| H  | 2.108424  | -1.404259 | 2.024824  |
| H  | -4.076137 | 0.363607  | 1.650966  |
| H  | -3.584795 | 1.131219  | -0.563593 |
| H  | -2.245504 | -1.722359 | 0.683564  |
| H  | -2.133594 | -0.511991 | -1.803571 |
| Na | 3.138752  | 1.067368  | 0.424145  |

47. Reactant of 2nd Glu-L3a C=O Migration

25

|    |           |           |           |
|----|-----------|-----------|-----------|
| C  | -3.405392 | 0.120879  | -0.189553 |
| C  | -2.07407  | -0.409221 | -0.713928 |
| C  | -0.968156 | 0.588147  | -0.466225 |
| O  | -1.192633 | 1.794626  | -0.889783 |
| C  | 0.298461  | 0.448966  | 0.213305  |
| C  | 0.973894  | -0.90192  | 0.487858  |
| C  | 1.635123  | -1.460472 | -0.767609 |
| O  | 2.675646  | -0.565431 | -1.156141 |
| O  | 1.971655  | -0.630519 | 1.47209   |
| O  | 1.029079  | 1.517279  | 0.186765  |
| O  | -1.7722   | -1.659505 | -0.157529 |
| O  | -3.263408 | 0.086873  | 1.219558  |
| H  | 0.251399  | -1.629828 | 0.847597  |
| H  | -4.201465 | -0.54871  | -0.527491 |
| H  | -0.664138 | 0.522788  | 1.035182  |
| H  | 2.052241  | -2.44642  | -0.539665 |
| H  | 0.886949  | -1.567253 | -1.55869  |
| H  | -0.337894 | 2.277137  | -0.721582 |
| H  | 3.073981  | -0.869842 | -1.975899 |
| H  | 2.108424  | -1.404259 | 2.024824  |
| H  | -4.076137 | 0.363607  | 1.650966  |
| H  | -3.584795 | 1.131219  | -0.563593 |
| H  | -2.245504 | -1.722359 | 0.683564  |
| H  | -2.133594 | -0.511991 | -1.803571 |
| Na | 3.138752  | 1.067368  | 0.424145  |

#### 48. Transition States of 3rd Glu-L3a C=O Migration

25

|    |           |           |           |
|----|-----------|-----------|-----------|
| C  | 3.290787  | 0.466565  | -0.20013  |
| C  | 2.009213  | -0.134394 | 0.377598  |
| C  | 0.831846  | 0.767635  | 0.189998  |
| O  | 0.993963  | 2.000418  | 0.559758  |
| C  | -0.46513  | 0.501275  | -0.392824 |
| C  | -1.050241 | -0.919616 | -0.569541 |
| C  | -1.440012 | -1.521873 | 0.769272  |
| O  | -2.427596 | -0.676359 | 1.362862  |
| O  | -2.24756  | -0.816914 | -1.330998 |
| O  | -1.275356 | 1.508386  | -0.34682  |
| O  | 1.728166  | -1.378169 | -0.205782 |
| O  | 4.246855  | -0.554642 | -0.017583 |
| H  | -0.331266 | -1.58377  | -1.043244 |
| H  | 3.548811  | 1.383388  | 0.335555  |
| H  | 0.423437  | 0.615749  | -1.290379 |
| H  | -1.850712 | -2.519169 | 0.593522  |
| H  | -0.553588 | -1.597318 | 1.404763  |
| H  | 0.095737  | 2.412725  | 0.44202   |
| H  | -2.692047 | -1.038916 | 2.212757  |
| H  | -2.045738 | -0.819456 | -2.271282 |
| H  | 5.101514  | -0.289495 | -0.367056 |
| H  | 3.139091  | 0.689188  | -1.26365  |
| H  | 2.567454  | -1.856127 | -0.261608 |
| H  | 2.139345  | -0.230838 | 1.466746  |
| Na | -3.340781 | 0.837702  | -0.106898 |

49. Reactant of 3rd Glu-L3a C=O Migration

25

|    |           |           |           |
|----|-----------|-----------|-----------|
| C  | 3.290787  | 0.466565  | -0.20013  |
| C  | 2.009213  | -0.134394 | 0.377598  |
| C  | 0.831846  | 0.767635  | 0.189998  |
| O  | 0.993963  | 2.000418  | 0.559758  |
| C  | -0.46513  | 0.501275  | -0.392824 |
| C  | -1.050241 | -0.919616 | -0.569541 |
| C  | -1.440012 | -1.521873 | 0.769272  |
| O  | -2.427596 | -0.676359 | 1.362862  |
| O  | -2.24756  | -0.816914 | -1.330998 |
| O  | -1.275356 | 1.508386  | -0.34682  |
| O  | 1.728166  | -1.378169 | -0.205782 |
| O  | 4.246855  | -0.554642 | -0.017583 |
| H  | -0.331266 | -1.58377  | -1.043244 |
| H  | 3.548811  | 1.383388  | 0.335555  |
| H  | 0.423437  | 0.615749  | -1.290379 |
| H  | -1.850712 | -2.519169 | 0.593522  |
| H  | -0.553588 | -1.597318 | 1.404763  |
| H  | 0.095737  | 2.412725  | 0.44202   |
| H  | -2.692047 | -1.038916 | 2.212757  |
| H  | -2.045738 | -0.819456 | -2.271282 |
| H  | 5.101514  | -0.289495 | -0.367056 |
| H  | 3.139091  | 0.689188  | -1.26365  |
| H  | 2.567454  | -1.856127 | -0.261608 |
| H  | 2.139345  | -0.230838 | 1.466746  |
| Na | -3.340781 | 0.837702  | -0.106898 |

## 50. Transition States of 4th Glu-L3a C=O Migration

25

|    |           |           |           |
|----|-----------|-----------|-----------|
| C  | 3.327614  | -0.067161 | 0.055315  |
| C  | 2.111486  | 0.3997    | -0.745955 |
| C  | 0.985466  | -0.581024 | -0.585606 |
| O  | 1.199047  | -1.754131 | -1.103082 |
| C  | -0.2469   | -0.492581 | 0.158802  |
| C  | -0.897497 | 0.836036  | 0.601548  |
| C  | -1.560178 | 1.554807  | -0.56165  |
| O  | -2.589997 | 0.709642  | -1.080054 |
| O  | -1.93302  | 0.535648  | 1.532125  |
| O  | -0.987839 | -1.555106 | 0.076185  |
| O  | 1.642068  | 1.66661   | -0.35625  |
| O  | 2.921182  | -0.163622 | 1.401377  |
| H  | -0.157316 | 1.505139  | 1.035576  |
| H  | 4.129688  | 0.669379  | -0.074313 |
| H  | 0.740963  | -0.641616 | 0.921919  |
| H  | -1.991443 | 2.487469  | -0.189016 |
| H  | -0.80978  | 1.773865  | -1.32442  |
| H  | 0.352912  | -2.250679 | -0.935764 |
| H  | -3.010299 | 1.139982  | -1.82926  |
| H  | -1.56224  | 0.418224  | 2.4118    |
| H  | 3.640128  | -0.4992   | 1.943508  |
| H  | 3.6632    | -1.028405 | -0.346095 |
| H  | 2.386258  | 2.25804   | -0.206748 |
| H  | 2.374149  | 0.377451  | -1.811695 |
| Na | -3.098882 | -1.056423 | 0.282489  |

51. Reactant of 4th Glu-L3a C=O Migration

25

|    |           |           |           |
|----|-----------|-----------|-----------|
| C  | 3.327614  | -0.067161 | 0.055315  |
| C  | 2.111486  | 0.3997    | -0.745955 |
| C  | 0.985466  | -0.581024 | -0.585606 |
| O  | 1.199047  | -1.754131 | -1.103082 |
| C  | -0.2469   | -0.492581 | 0.158802  |
| C  | -0.897497 | 0.836036  | 0.601548  |
| C  | -1.560178 | 1.554807  | -0.56165  |
| O  | -2.589997 | 0.709642  | -1.080054 |
| O  | -1.93302  | 0.535648  | 1.532125  |
| O  | -0.987839 | -1.555106 | 0.076185  |
| O  | 1.642068  | 1.66661   | -0.35625  |
| O  | 2.921182  | -0.163622 | 1.401377  |
| H  | -0.157316 | 1.505139  | 1.035576  |
| H  | 4.129688  | 0.669379  | -0.074313 |
| H  | 0.740963  | -0.641616 | 0.921919  |
| H  | -1.991443 | 2.487469  | -0.189016 |
| H  | -0.80978  | 1.773865  | -1.32442  |
| H  | 0.352912  | -2.250679 | -0.935764 |
| H  | -3.010299 | 1.139982  | -1.82926  |
| H  | -1.56224  | 0.418224  | 2.4118    |
| H  | 3.640128  | -0.4992   | 1.943508  |
| H  | 3.6632    | -1.028405 | -0.346095 |
| H  | 2.386258  | 2.25804   | -0.206748 |
| H  | 2.374149  | 0.377451  | -1.811695 |
| Na | -3.098882 | -1.056423 | 0.282489  |

## 52. Transition States of 1st Glu-L3b C-C cleavage

25

|    |           |           |           |
|----|-----------|-----------|-----------|
| C  | -1.335896 | -0.924166 | 1.425372  |
| C  | -1.355754 | -1.24042  | -0.05992  |
| C  | -0.328333 | -0.408188 | -0.819058 |
| O  | -0.704085 | 0.7448    | -1.304078 |
| C  | 0.994853  | -0.785007 | -0.838362 |
| C  | 1.533639  | 0.895705  | 0.394871  |
| C  | 3.017303  | 0.867167  | 0.097609  |
| O  | 3.518248  | -0.441131 | 0.294341  |
| O  | 0.880972  | 1.906624  | -0.023076 |
| O  | 1.316642  | -1.951774 | -0.218773 |
| O  | -2.665561 | -0.924358 | -0.529193 |
| O  | -1.609779 | 0.476351  | 1.547184  |
| H  | 1.232056  | 0.393307  | 1.323403  |
| H  | -0.353683 | -1.172306 | 1.835198  |
| H  | 1.652557  | -0.401223 | -1.611883 |
| H  | 3.188468  | 1.229653  | -0.92034  |
| H  | 3.474435  | 1.577439  | 0.798243  |
| H  | 2.267536  | -1.93855  | -0.038075 |
| H  | 4.475566  | -0.423024 | 0.374243  |
| H  | 0.024204  | 1.494205  | -0.789277 |
| H  | -1.534114 | 0.749276  | 2.46589   |
| H  | -2.108032 | -1.510759 | 1.928649  |
| H  | -2.881132 | -1.461725 | -1.297447 |
| H  | -1.128548 | -2.300951 | -0.189754 |
| Na | -2.668697 | 1.350001  | -0.292107 |



53. Reactant of 1st Glu-L3b C-C cleavage

25

|    |           |           |           |
|----|-----------|-----------|-----------|
| C  | -1.335896 | -0.924166 | 1.425372  |
| C  | -1.355754 | -1.24042  | -0.05992  |
| C  | -0.328333 | -0.408188 | -0.819058 |
| O  | -0.704085 | 0.7448    | -1.304078 |
| C  | 0.994853  | -0.785007 | -0.838362 |
| C  | 1.533639  | 0.895705  | 0.394871  |
| C  | 3.017303  | 0.867167  | 0.097609  |
| O  | 3.518248  | -0.441131 | 0.294341  |
| O  | 0.880972  | 1.906624  | -0.023076 |
| O  | 1.316642  | -1.951774 | -0.218773 |
| O  | -2.665561 | -0.924358 | -0.529193 |
| O  | -1.609779 | 0.476351  | 1.547184  |
| H  | 1.232056  | 0.393307  | 1.323403  |
| H  | -0.353683 | -1.172306 | 1.835198  |
| H  | 1.652557  | -0.401223 | -1.611883 |
| H  | 3.188468  | 1.229653  | -0.92034  |
| H  | 3.474435  | 1.577439  | 0.798243  |
| H  | 2.267536  | -1.93855  | -0.038075 |
| H  | 4.475566  | -0.423024 | 0.374243  |
| H  | 0.024204  | 1.494205  | -0.789277 |
| H  | -1.534114 | 0.749276  | 2.46589   |
| H  | -2.108032 | -1.510759 | 1.928649  |
| H  | -2.881132 | -1.461725 | -1.297447 |
| H  | -1.128548 | -2.300951 | -0.189754 |
| Na | -2.668697 | 1.350001  | -0.292107 |

#### 54. Transition States of 2nd Glu-L3b C-C cleavage

25

|    |           |           |           |
|----|-----------|-----------|-----------|
| C  | 1.433186  | 0.422455  | 1.563075  |
| C  | 1.281025  | 1.211783  | 0.260032  |
| C  | 0.263085  | 0.558229  | -0.656205 |
| O  | 0.635585  | -0.524699 | -1.289149 |
| C  | -1.068412 | 0.914169  | -0.647593 |
| C  | -1.55845  | -0.839745 | 0.41949   |
| C  | -2.980375 | -0.970468 | -0.079326 |
| O  | -3.628692 | 0.279438  | 0.052711  |
| O  | -0.73752  | -1.784585 | 0.127221  |
| O  | -1.447785 | 1.980356  | 0.097915  |
| O  | 2.559876  | 1.17443   | -0.38033  |
| O  | 1.804315  | -0.928643 | 1.295398  |
| H  | -1.461036 | -0.323026 | 1.381497  |
| H  | 0.512075  | 0.473677  | 2.147296  |
| H  | -1.692051 | 0.617499  | -1.485146 |
| H  | -2.97553  | -1.330142 | -1.113291 |
| H  | -3.450413 | -1.73538  | 0.551344  |
| H  | -2.412517 | 1.966521  | 0.168131  |
| H  | -4.58218  | 0.168941  | 0.009363  |
| H  | -0.00633  | -1.339292 | -0.773142 |
| H  | 1.009076  | -1.480832 | 1.283115  |
| H  | 2.23814   | 0.873712  | 2.144209  |
| H  | 2.699788  | 1.972954  | -0.897638 |
| H  | 0.979978  | 2.235135  | 0.492428  |
| Na | 2.857674  | -1.040789 | -0.754104 |

55. Reactant of 2nd Glu-L3b C-C cleavage

25

|    |           |           |           |
|----|-----------|-----------|-----------|
| C  | 1.433186  | 0.422455  | 1.563075  |
| C  | 1.281025  | 1.211783  | 0.260032  |
| C  | 0.263085  | 0.558229  | -0.656205 |
| O  | 0.635585  | -0.524699 | -1.289149 |
| C  | -1.068412 | 0.914169  | -0.647593 |
| C  | -1.55845  | -0.839745 | 0.41949   |
| C  | -2.980375 | -0.970468 | -0.079326 |
| O  | -3.628692 | 0.279438  | 0.052711  |
| O  | -0.73752  | -1.784585 | 0.127221  |
| O  | -1.447785 | 1.980356  | 0.097915  |
| O  | 2.559876  | 1.17443   | -0.38033  |
| O  | 1.804315  | -0.928643 | 1.295398  |
| H  | -1.461036 | -0.323026 | 1.381497  |
| H  | 0.512075  | 0.473677  | 2.147296  |
| H  | -1.692051 | 0.617499  | -1.485146 |
| H  | -2.97553  | -1.330142 | -1.113291 |
| H  | -3.450413 | -1.73538  | 0.551344  |
| H  | -2.412517 | 1.966521  | 0.168131  |
| H  | -4.58218  | 0.168941  | 0.009363  |
| H  | -0.00633  | -1.339292 | -0.773142 |
| H  | 1.009076  | -1.480832 | 1.283115  |
| H  | 2.23814   | 0.873712  | 2.144209  |
| H  | 2.699788  | 1.972954  | -0.897638 |
| H  | 0.979978  | 2.235135  | 0.492428  |
| Na | 2.857674  | -1.040789 | -0.754104 |

56. Transition States of 3rd Glu-L3b C-C cleavage

25

|    |           |           |           |
|----|-----------|-----------|-----------|
| C  | 1.554965  | 1.376046  | 1.019335  |
| C  | 1.635843  | 1.06117   | -0.466278 |
| C  | 0.37631   | 0.41139   | -1.041732 |
| O  | 0.542573  | -0.728404 | -1.646317 |
| C  | -0.91959  | 0.843342  | -0.814236 |
| C  | -1.320077 | -0.763522 | 0.41491   |
| C  | -2.812073 | -0.843422 | 0.172818  |
| O  | -3.367581 | 0.45079   | 0.314769  |
| O  | -0.621244 | -1.793155 | 0.058956  |
| O  | -1.135175 | 1.998585  | -0.133176 |
| O  | 2.729674  | 0.168535  | -0.613105 |
| O  | 1.347809  | 0.129144  | 1.698611  |
| H  | -1.02321  | -0.217978 | 1.314583  |
| H  | 0.734804  | 2.064848  | 1.216536  |
| H  | -1.669152 | 0.539942  | -1.539726 |
| H  | -3.002338 | -1.268443 | -0.818107 |
| H  | -3.208365 | -1.533311 | 0.927797  |
| H  | -2.077703 | 2.035334  | 0.084052  |
| H  | -4.32428  | 0.397858  | 0.386857  |
| H  | -0.106872 | -1.435994 | -1.07942  |
| H  | 1.358565  | 0.277561  | 2.648835  |
| H  | 2.508033  | 1.814298  | 1.32207   |
| H  | 2.959214  | 0.083064  | -1.545009 |
| H  | 1.811878  | 2.004115  | -0.997446 |
| Na | 1.725338  | -1.734115 | 0.448379  |

57. Reactant of 3rd Glu-L3b C-C cleavage

25

|    |           |           |           |
|----|-----------|-----------|-----------|
| C  | 1.554965  | 1.376046  | 1.019335  |
| C  | 1.635843  | 1.06117   | -0.466278 |
| C  | 0.37631   | 0.41139   | -1.041732 |
| O  | 0.542573  | -0.728404 | -1.646317 |
| C  | -0.91959  | 0.843342  | -0.814236 |
| C  | -1.320077 | -0.763522 | 0.41491   |
| C  | -2.812073 | -0.843422 | 0.172818  |
| O  | -3.367581 | 0.45079   | 0.314769  |
| O  | -0.621244 | -1.793155 | 0.058956  |
| O  | -1.135175 | 1.998585  | -0.133176 |
| O  | 2.729674  | 0.168535  | -0.613105 |
| O  | 1.347809  | 0.129144  | 1.698611  |
| H  | -1.02321  | -0.217978 | 1.314583  |
| H  | 0.734804  | 2.064848  | 1.216536  |
| H  | -1.669152 | 0.539942  | -1.539726 |
| H  | -3.002338 | -1.268443 | -0.818107 |
| H  | -3.208365 | -1.533311 | 0.927797  |
| H  | -2.077703 | 2.035334  | 0.084052  |
| H  | -4.32428  | 0.397858  | 0.386857  |
| H  | -0.106872 | -1.435994 | -1.07942  |
| H  | 1.358565  | 0.277561  | 2.648835  |
| H  | 2.508033  | 1.814298  | 1.32207   |
| H  | 2.959214  | 0.083064  | -1.545009 |
| H  | 1.811878  | 2.004115  | -0.997446 |
| Na | 1.725338  | -1.734115 | 0.448379  |

58. Transition States of 4th Glu-L3b C-C cleavage

25

|    |           |           |           |
|----|-----------|-----------|-----------|
| C  | 2.098152  | -1.370168 | -0.362395 |
| C  | 0.831676  | -1.59508  | 0.451942  |
| C  | -0.434983 | -1.158857 | -0.26742  |
| O  | -0.370742 | -0.840238 | -1.52092  |
| C  | -1.665791 | -1.067866 | 0.367721  |
| C  | -1.549092 | 1.017965  | 0.245189  |
| C  | -0.759595 | 1.621514  | 1.384575  |
| O  | 0.618123  | 1.694701  | 1.084926  |
| O  | -1.168502 | 1.284057  | -0.969937 |
| O  | -2.826295 | -1.199452 | -0.326625 |
| O  | 0.867085  | -0.968858 | 1.725907  |
| O  | 2.371679  | 0.026398  | -0.512436 |
| H  | -2.626942 | 0.94637   | 0.41473   |
| H  | 1.978744  | -1.836609 | -1.342669 |
| H  | -1.762754 | -1.275408 | 1.426311  |
| H  | -1.129708 | 2.644725  | 1.515505  |
| H  | -0.943724 | 1.079263  | 2.313953  |
| H  | -2.642053 | -1.358212 | -1.261738 |
| H  | 1.041433  | 0.897499  | 1.438528  |
| H  | -0.871675 | 0.210918  | -1.510959 |
| H  | 3.324889  | 0.149971  | -0.496044 |
| H  | 2.928642  | -1.850189 | 0.160787  |
| H  | 1.30913   | -1.531518 | 2.369789  |
| H  | 0.738985  | -2.682577 | 0.575266  |
| Na | 1.054732  | 1.813441  | -1.124405 |

59. Reactant of 4th Glu-L3b C-C cleavage

25

|    |           |           |           |
|----|-----------|-----------|-----------|
| C  | 2.098152  | -1.370168 | -0.362395 |
| C  | 0.831676  | -1.59508  | 0.451942  |
| C  | -0.434983 | -1.158857 | -0.26742  |
| O  | -0.370742 | -0.840238 | -1.52092  |
| C  | -1.665791 | -1.067866 | 0.367721  |
| C  | -1.549092 | 1.017965  | 0.245189  |
| C  | -0.759595 | 1.621514  | 1.384575  |
| O  | 0.618123  | 1.694701  | 1.084926  |
| O  | -1.168502 | 1.284057  | -0.969937 |
| O  | -2.826295 | -1.199452 | -0.326625 |
| O  | 0.867085  | -0.968858 | 1.725907  |
| O  | 2.371679  | 0.026398  | -0.512436 |
| H  | -2.626942 | 0.94637   | 0.41473   |
| H  | 1.978744  | -1.836609 | -1.342669 |
| H  | -1.762754 | -1.275408 | 1.426311  |
| H  | -1.129708 | 2.644725  | 1.515505  |
| H  | -0.943724 | 1.079263  | 2.313953  |
| H  | -2.642053 | -1.358212 | -1.261738 |
| H  | 1.041433  | 0.897499  | 1.438528  |
| H  | -0.871675 | 0.210918  | -1.510959 |
| H  | 3.324889  | 0.149971  | -0.496044 |
| H  | 2.928642  | -1.850189 | 0.160787  |
| H  | 1.30913   | -1.531518 | 2.369789  |
| H  | 0.738985  | -2.682577 | 0.575266  |
| Na | 1.054732  | 1.813441  | -1.124405 |

## 60. Transition States of 1st Glu-L3b C=O Migration

25

|    |           |           |           |
|----|-----------|-----------|-----------|
| C  | -2.814906 | -0.245699 | -0.634732 |
| C  | -2.163137 | 0.257548  | 0.655146  |
| C  | -0.929948 | 1.019962  | 0.265667  |
| O  | -1.127439 | 2.079679  | -0.452924 |
| C  | 0.459168  | 0.776988  | 0.574175  |
| C  | 1.031791  | -0.579389 | 1.073292  |
| C  | 0.792894  | -1.667008 | 0.033364  |
| O  | 1.101909  | -1.169915 | -1.269946 |
| O  | 2.444192  | -0.440208 | 1.168736  |
| O  | 1.2621    | 1.594669  | -0.033429 |
| O  | -1.766921 | -0.771618 | 1.526639  |
| O  | -1.825693 | -0.92209  | -1.398506 |
| H  | 0.600031  | -0.879715 | 2.026993  |
| H  | -3.21605  | 0.610474  | -1.184266 |
| H  | -0.134564 | 1.298329  | 1.560002  |
| H  | 1.464361  | -2.500021 | 0.246116  |
| H  | -0.240173 | -2.004242 | 0.07614   |
| H  | -0.20385  | 2.380636  | -0.686579 |
| H  | 0.261468  | -0.964179 | -1.699313 |
| H  | 2.674133  | 0.13337   | 1.907119  |
| H  | -2.245285 | -1.34715  | -2.152718 |
| H  | -3.633303 | -0.919806 | -0.364619 |
| H  | -2.523928 | -1.095581 | 2.023419  |
| H  | -2.859816 | 0.955513  | 1.134238  |
| Na | 2.826965  | 0.363075  | -1.001142 |



61. Reactant of 1st Glu-L3b C=O Migration

25

|    |           |           |           |
|----|-----------|-----------|-----------|
| C  | -2.814906 | -0.245699 | -0.634732 |
| C  | -2.163137 | 0.257548  | 0.655146  |
| C  | -0.929948 | 1.019962  | 0.265667  |
| O  | -1.127439 | 2.079679  | -0.452924 |
| C  | 0.459168  | 0.776988  | 0.574175  |
| C  | 1.031791  | -0.579389 | 1.073292  |
| C  | 0.792894  | -1.667008 | 0.033364  |
| O  | 1.101909  | -1.169915 | -1.269946 |
| O  | 2.444192  | -0.440208 | 1.168736  |
| O  | 1.2621    | 1.594669  | -0.033429 |
| O  | -1.766921 | -0.771618 | 1.526639  |
| O  | -1.825693 | -0.92209  | -1.398506 |
| H  | 0.600031  | -0.879715 | 2.026993  |
| H  | -3.21605  | 0.610474  | -1.184266 |
| H  | -0.134564 | 1.298329  | 1.560002  |
| H  | 1.464361  | -2.500021 | 0.246116  |
| H  | -0.240173 | -2.004242 | 0.07614   |
| H  | -0.20385  | 2.380636  | -0.686579 |
| H  | 0.261468  | -0.964179 | -1.699313 |
| H  | 2.674133  | 0.13337   | 1.907119  |
| H  | -2.245285 | -1.34715  | -2.152718 |
| H  | -3.633303 | -0.919806 | -0.364619 |
| H  | -2.523928 | -1.095581 | 2.023419  |
| H  | -2.859816 | 0.955513  | 1.134238  |
| Na | 2.826965  | 0.363075  | -1.001142 |

## 62. Transition States of 2nd Glu-L3b C=O Migration

25

|    |           |           |           |
|----|-----------|-----------|-----------|
| C  | -2.997259 | -0.227354 | -0.584744 |
| C  | -2.244877 | 0.234243  | 0.661537  |
| C  | -1.016988 | 0.977453  | 0.211729  |
| O  | -1.239155 | 2.047544  | -0.483349 |
| C  | 0.384512  | 0.737869  | 0.472391  |
| C  | 0.960285  | -0.615549 | 0.950003  |
| C  | 0.921837  | -1.653071 | -0.157114 |
| O  | 1.710087  | -1.161817 | -1.247003 |
| O  | 2.331581  | -0.421208 | 1.2818    |
| O  | 1.171668  | 1.574919  | -0.125558 |
| O  | -1.821167 | -0.823882 | 1.48431   |
| O  | -2.086793 | -0.960974 | -1.376716 |
| H  | 0.400562  | -1.003628 | 1.797919  |
| H  | -3.375133 | 0.654071  | -1.11154  |
| H  | -0.185831 | 1.238136  | 1.48609   |
| H  | 1.353841  | -2.581118 | 0.226437  |
| H  | -0.113511 | -1.810205 | -0.465244 |
| H  | -0.328808 | 2.350696  | -0.75454  |
| H  | 1.583301  | -1.727487 | -2.012559 |
| H  | 2.410828  | -0.06321  | 2.170902  |
| H  | -2.517429 | -1.237865 | -2.189932 |
| H  | -3.846666 | -0.842572 | -0.266173 |
| H  | -2.58552  | -1.275642 | 1.854341  |
| H  | -2.884042 | 0.941154  | 1.205212  |
| Na | 3.046689  | 0.599951  | -0.68469  |

63. Reactant of 2nd Glu-L3b C=O Migration

25

|    |           |           |           |
|----|-----------|-----------|-----------|
| C  | -2.997259 | -0.227354 | -0.584744 |
| C  | -2.244877 | 0.234243  | 0.661537  |
| C  | -1.016988 | 0.977453  | 0.211729  |
| O  | -1.239155 | 2.047544  | -0.483349 |
| C  | 0.384512  | 0.737869  | 0.472391  |
| C  | 0.960285  | -0.615549 | 0.950003  |
| C  | 0.921837  | -1.653071 | -0.157114 |
| O  | 1.710087  | -1.161817 | -1.247003 |
| O  | 2.331581  | -0.421208 | 1.2818    |
| O  | 1.171668  | 1.574919  | -0.125558 |
| O  | -1.821167 | -0.823882 | 1.48431   |
| O  | -2.086793 | -0.960974 | -1.376716 |
| H  | 0.400562  | -1.003628 | 1.797919  |
| H  | -3.375133 | 0.654071  | -1.11154  |
| H  | -0.185831 | 1.238136  | 1.48609   |
| H  | 1.353841  | -2.581118 | 0.226437  |
| H  | -0.113511 | -1.810205 | -0.465244 |
| H  | -0.328808 | 2.350696  | -0.75454  |
| H  | 1.583301  | -1.727487 | -2.012559 |
| H  | 2.410828  | -0.06321  | 2.170902  |
| H  | -2.517429 | -1.237865 | -2.189932 |
| H  | -3.846666 | -0.842572 | -0.266173 |
| H  | -2.58552  | -1.275642 | 1.854341  |
| H  | -2.884042 | 0.941154  | 1.205212  |
| Na | 3.046689  | 0.599951  | -0.68469  |

#### 64. Transition States of 3rd Glu-L3b C=O Migration

25

|    |           |           |           |
|----|-----------|-----------|-----------|
| C  | -3.02704  | -0.225104 | -0.584304 |
| C  | -2.271863 | 0.222069  | 0.666111  |
| C  | -1.041713 | 0.962128  | 0.215883  |
| O  | -1.267273 | 2.048664  | -0.452597 |
| C  | 0.362994  | 0.708673  | 0.437857  |
| C  | 0.926638  | -0.647632 | 0.881321  |
| C  | 0.975103  | -1.63662  | -0.275946 |
| O  | 1.887217  | -1.127303 | -1.25256  |
| O  | 2.252367  | -0.36679  | 1.336086  |
| O  | 1.141346  | 1.549811  | -0.165098 |
| O  | -1.861115 | -0.847073 | 1.480755  |
| O  | -2.119263 | -0.955325 | -1.382967 |
| H  | 0.318987  | -1.0695   | 1.678336  |
| H  | -3.401663 | 0.661991  | -1.103698 |
| H  | -0.176807 | 1.191856  | 1.475204  |
| H  | 1.334837  | -2.600679 | 0.098487  |
| H  | -0.028793 | -1.752759 | -0.691647 |
| H  | -0.358642 | 2.346153  | -0.73844  |
| H  | 1.807864  | -1.63812  | -2.061799 |
| H  | 2.508243  | -1.003631 | 2.008284  |
| H  | -2.552127 | -1.226999 | -2.196762 |
| H  | -3.87827  | -0.840334 | -0.270864 |
| H  | -2.631821 | -1.284901 | 1.85419   |
| H  | -2.904547 | 0.93078   | 1.214765  |
| Na | 3.104708  | 0.688108  | -0.529139 |

65. Reactant of 3rd Glu-L3b C=O Migration

25

|    |           |           |           |
|----|-----------|-----------|-----------|
| C  | -3.02704  | -0.225104 | -0.584304 |
| C  | -2.271863 | 0.222069  | 0.666111  |
| C  | -1.041713 | 0.962128  | 0.215883  |
| O  | -1.267273 | 2.048664  | -0.452597 |
| C  | 0.362994  | 0.708673  | 0.437857  |
| C  | 0.926638  | -0.647632 | 0.881321  |
| C  | 0.975103  | -1.63662  | -0.275946 |
| O  | 1.887217  | -1.127303 | -1.25256  |
| O  | 2.252367  | -0.36679  | 1.336086  |
| O  | 1.141346  | 1.549811  | -0.165098 |
| O  | -1.861115 | -0.847073 | 1.480755  |
| O  | -2.119263 | -0.955325 | -1.382967 |
| H  | 0.318987  | -1.0695   | 1.678336  |
| H  | -3.401663 | 0.661991  | -1.103698 |
| H  | -0.176807 | 1.191856  | 1.475204  |
| H  | 1.334837  | -2.600679 | 0.098487  |
| H  | -0.028793 | -1.752759 | -0.691647 |
| H  | -0.358642 | 2.346153  | -0.73844  |
| H  | 1.807864  | -1.63812  | -2.061799 |
| H  | 2.508243  | -1.003631 | 2.008284  |
| H  | -2.552127 | -1.226999 | -2.196762 |
| H  | -3.87827  | -0.840334 | -0.270864 |
| H  | -2.631821 | -1.284901 | 1.85419   |
| H  | -2.904547 | 0.93078   | 1.214765  |
| Na | 3.104708  | 0.688108  | -0.529139 |

## 66. Transition States of 4th Glu-L3b C=O Migration

25

|    |           |           |           |
|----|-----------|-----------|-----------|
| C  | 2.927173  | 0.120562  | 0.772686  |
| C  | 2.103164  | 0.225879  | -0.515302 |
| C  | 0.836483  | 0.977906  | -0.24356  |
| O  | 0.985938  | 2.173905  | 0.236274  |
| C  | -0.545781 | 0.621642  | -0.48616  |
| C  | -1.040167 | -0.821843 | -0.726438 |
| C  | -1.077721 | -1.619777 | 0.566294  |
| O  | -1.995227 | -0.982781 | 1.457351  |
| O  | -2.381088 | -0.757174 | -1.200151 |
| O  | -1.392464 | 1.512653  | -0.082358 |
| O  | 1.775977  | -1.046025 | -1.007602 |
| O  | 3.995171  | -0.723645 | 0.407316  |
| H  | -0.393729 | -1.345083 | -1.427395 |
| H  | 2.318893  | -0.324562 | 1.570228  |
| H  | 0.041255  | 0.948715  | -1.558852 |
| H  | -1.416925 | -2.632619 | 0.335143  |
| H  | -0.073446 | -1.657786 | 0.996185  |
| H  | 0.056976  | 2.48538   | 0.413939  |
| H  | -2.059309 | -1.492403 | 2.269491  |
| H  | -2.392623 | -0.651772 | -2.155944 |
| H  | 4.612811  | -0.830408 | 1.135175  |
| H  | 3.262116  | 1.114819  | 1.078356  |
| H  | 2.593492  | -1.562182 | -1.017769 |
| H  | 2.694768  | 0.793486  | -1.245283 |
| Na | -3.306331 | 0.610249  | 0.446815  |

67. Reactant of 4th Glu-L3b C=O Migration

25

|    |           |           |           |
|----|-----------|-----------|-----------|
| C  | 2.927173  | 0.120562  | 0.772686  |
| C  | 2.103164  | 0.225879  | -0.515302 |
| C  | 0.836483  | 0.977906  | -0.24356  |
| O  | 0.985938  | 2.173905  | 0.236274  |
| C  | -0.545781 | 0.621642  | -0.48616  |
| C  | -1.040167 | -0.821843 | -0.726438 |
| C  | -1.077721 | -1.619777 | 0.566294  |
| O  | -1.995227 | -0.982781 | 1.457351  |
| O  | -2.381088 | -0.757174 | -1.200151 |
| O  | -1.392464 | 1.512653  | -0.082358 |
| O  | 1.775977  | -1.046025 | -1.007602 |
| O  | 3.995171  | -0.723645 | 0.407316  |
| H  | -0.393729 | -1.345083 | -1.427395 |
| H  | 2.318893  | -0.324562 | 1.570228  |
| H  | 0.041255  | 0.948715  | -1.558852 |
| H  | -1.416925 | -2.632619 | 0.335143  |
| H  | -0.073446 | -1.657786 | 0.996185  |
| H  | 0.056976  | 2.48538   | 0.413939  |
| H  | -2.059309 | -1.492403 | 2.269491  |
| H  | -2.392623 | -0.651772 | -2.155944 |
| H  | 4.612811  | -0.830408 | 1.135175  |
| H  | 3.262116  | 1.114819  | 1.078356  |
| H  | 2.593492  | -1.562182 | -1.017769 |
| H  | 2.694768  | 0.793486  | -1.245283 |
| Na | -3.306331 | 0.610249  | 0.446815  |

68. Transition States of 1st Man-L1 C-C cleavage

25

|    |           |           |           |
|----|-----------|-----------|-----------|
| C  | -2.880587 | -0.395299 | -0.630283 |
| C  | -2.208742 | -0.383011 | 0.577876  |
| C  | -0.409668 | -0.143794 | -0.324497 |
| O  | -0.474762 | 0.991585  | -0.910793 |
| C  | 0.444444  | -0.244916 | 0.936044  |
| C  | 1.939628  | -0.401549 | 0.583123  |
| C  | 2.295178  | -1.706362 | -0.12296  |
| O  | 1.912729  | -1.540463 | -1.478921 |
| O  | 2.370878  | 0.706061  | -0.198477 |
| O  | 0.280512  | 0.985335  | 1.647053  |
| O  | -2.15888  | -1.557953 | 1.301143  |
| O  | -2.866207 | 0.601326  | -1.456266 |
| H  | 2.488135  | -0.361778 | 1.529434  |
| H  | -3.354203 | -1.311736 | -0.982815 |
| H  | -2.059617 | 0.547925  | 1.117351  |
| H  | -0.38495  | -1.055834 | -0.929892 |
| H  | 0.120158  | -1.096628 | 1.539111  |
| H  | -2.797405 | -1.542483 | 2.021956  |
| H  | 3.373246  | -1.868949 | -0.041509 |
| H  | 1.771306  | -2.545663 | 0.345993  |
| H  | 0.48835   | 0.856635  | 2.577086  |
| H  | -1.9829   | 1.091586  | -1.329566 |
| H  | 2.287634  | -2.237644 | -2.023921 |
| H  | 2.399198  | 0.395541  | -1.116946 |
| Na | 0.914124  | 2.481044  | -0.004729 |



69. Reactant of 1st Man-L1 C-C cleavage

25

|    |           |           |           |
|----|-----------|-----------|-----------|
| C  | -2.880587 | -0.395299 | -0.630283 |
| C  | -2.208742 | -0.383011 | 0.577876  |
| C  | -0.409668 | -0.143794 | -0.324497 |
| O  | -0.474762 | 0.991585  | -0.910793 |
| C  | 0.444444  | -0.244916 | 0.936044  |
| C  | 1.939628  | -0.401549 | 0.583123  |
| C  | 2.295178  | -1.706362 | -0.12296  |
| O  | 1.912729  | -1.540463 | -1.478921 |
| O  | 2.370878  | 0.706061  | -0.198477 |
| O  | 0.280512  | 0.985335  | 1.647053  |
| O  | -2.15888  | -1.557953 | 1.301143  |
| O  | -2.866207 | 0.601326  | -1.456266 |
| H  | 2.488135  | -0.361778 | 1.529434  |
| H  | -3.354203 | -1.311736 | -0.982815 |
| H  | -2.059617 | 0.547925  | 1.117351  |
| H  | -0.38495  | -1.055834 | -0.929892 |
| H  | 0.120158  | -1.096628 | 1.539111  |
| H  | -2.797405 | -1.542483 | 2.021956  |
| H  | 3.373246  | -1.868949 | -0.041509 |
| H  | 1.771306  | -2.545663 | 0.345993  |
| H  | 0.48835   | 0.856635  | 2.577086  |
| H  | -1.9829   | 1.091586  | -1.329566 |
| H  | 2.287634  | -2.237644 | -2.023921 |
| H  | 2.399198  | 0.395541  | -1.116946 |
| Na | 0.914124  | 2.481044  | -0.004729 |

70. Transition States of 2nd Man-L1 C-C cleavage

25

|    |           |           |           |
|----|-----------|-----------|-----------|
| C  | -1.694138 | -1.655743 | 0.08343   |
| C  | -1.8911   | -0.401215 | -0.445902 |
| C  | -0.757525 | 0.393142  | 1.18764   |
| O  | 0.034866  | -0.470952 | 1.712623  |
| C  | -0.120105 | 1.594274  | 0.48835   |
| C  | 1.164467  | 1.375804  | -0.337754 |
| C  | 2.417985  | 0.864259  | 0.375854  |
| O  | 2.436905  | -0.545827 | 0.546567  |
| O  | 0.938547  | 0.507198  | -1.456322 |
| O  | -1.100652 | 2.205759  | -0.339831 |
| O  | -3.12421  | 0.141854  | -0.409894 |
| O  | -0.483991 | -2.147734 | 0.168068  |
| H  | 1.419899  | 2.372781  | -0.714926 |
| H  | -2.503307 | -2.16238  | 0.612187  |
| H  | -1.181073 | -0.013891 | -1.163181 |
| H  | -1.701786 | 0.62351   | 1.689352  |
| H  | 0.153025  | 2.267507  | 1.314079  |
| H  | -3.06915  | 1.056799  | -0.70748  |
| H  | 3.276958  | 1.105117  | -0.250848 |
| H  | 2.543902  | 1.374974  | 1.334219  |
| H  | -1.104708 | 3.15926   | -0.21669  |
| H  | -0.087872 | -1.500746 | 1.057777  |
| H  | 1.963112  | -0.730644 | 1.367418  |
| H  | 0.577044  | 1.020034  | -2.186238 |
| Na | 1.398614  | -1.737985 | -1.09228  |

71. Reactant of 2nd Man-L1 C-C cleavage

25

|    |           |           |           |
|----|-----------|-----------|-----------|
| C  | -1.694138 | -1.655743 | 0.08343   |
| C  | -1.8911   | -0.401215 | -0.445902 |
| C  | -0.757525 | 0.393142  | 1.18764   |
| O  | 0.034866  | -0.470952 | 1.712623  |
| C  | -0.120105 | 1.594274  | 0.48835   |
| C  | 1.164467  | 1.375804  | -0.337754 |
| C  | 2.417985  | 0.864259  | 0.375854  |
| O  | 2.436905  | -0.545827 | 0.546567  |
| O  | 0.938547  | 0.507198  | -1.456322 |
| O  | -1.100652 | 2.205759  | -0.339831 |
| O  | -3.12421  | 0.141854  | -0.409894 |
| O  | -0.483991 | -2.147734 | 0.168068  |
| H  | 1.419899  | 2.372781  | -0.714926 |
| H  | -2.503307 | -2.16238  | 0.612187  |
| H  | -1.181073 | -0.013891 | -1.163181 |
| H  | -1.701786 | 0.62351   | 1.689352  |
| H  | 0.153025  | 2.267507  | 1.314079  |
| H  | -3.06915  | 1.056799  | -0.70748  |
| H  | 3.276958  | 1.105117  | -0.250848 |
| H  | 2.543902  | 1.374974  | 1.334219  |
| H  | -1.104708 | 3.15926   | -0.21669  |
| H  | -0.087872 | -1.500746 | 1.057777  |
| H  | 1.963112  | -0.730644 | 1.367418  |
| H  | 0.577044  | 1.020034  | -2.186238 |
| Na | 1.398614  | -1.737985 | -1.09228  |

## 72. Transition States of 3rd Man-L1 C-C cleavage

25

|    |           |           |           |
|----|-----------|-----------|-----------|
| C  | -2.366576 | -0.381127 | 0.94738   |
| C  | -2.39146  | -1.166162 | -0.200094 |
| C  | -0.596854 | -0.275965 | -0.566395 |
| O  | -0.836631 | 1.004152  | -0.633829 |
| C  | 0.5004    | -0.790656 | 0.364945  |
| C  | 1.850071  | -1.110855 | -0.315918 |
| C  | 2.750423  | 0.107985  | -0.526677 |
| O  | 2.051905  | 1.241631  | -1.031416 |
| O  | 2.599933  | -1.931716 | 0.560965  |
| O  | 0.668131  | 0.160658  | 1.40994   |
| O  | -3.08431  | -0.810769 | -1.296543 |
| O  | -2.649543 | 0.87066   | 0.84738   |
| H  | 1.650029  | -1.618582 | -1.266793 |
| H  | -1.964409 | -0.777579 | 1.880107  |
| H  | -2.153199 | -2.222579 | -0.157982 |
| H  | -0.658407 | -0.823127 | -1.512203 |
| H  | 0.165876  | -1.745766 | 0.786578  |
| H  | -3.514536 | 0.044023  | -1.154165 |
| H  | 3.163613  | 0.389009  | 0.442959  |
| H  | 3.58828   | -0.161688 | -1.170926 |
| H  | 1.197219  | -0.242144 | 2.108775  |
| H  | -1.866517 | 1.190394  | 0.071978  |
| H  | 2.050941  | 1.245656  | -1.992411 |
| H  | 2.526903  | -2.859663 | 0.323439  |
| Na | 0.667482  | 2.273254  | 0.415384  |

73. Reactant of 3rd Man-L1 C-C cleavage

25

|    |           |           |           |
|----|-----------|-----------|-----------|
| C  | -2.366576 | -0.381127 | 0.94738   |
| C  | -2.39146  | -1.166162 | -0.200094 |
| C  | -0.596854 | -0.275965 | -0.566395 |
| O  | -0.836631 | 1.004152  | -0.633829 |
| C  | 0.5004    | -0.790656 | 0.364945  |
| C  | 1.850071  | -1.110855 | -0.315918 |
| C  | 2.750423  | 0.107985  | -0.526677 |
| O  | 2.051905  | 1.241631  | -1.031416 |
| O  | 2.599933  | -1.931716 | 0.560965  |
| O  | 0.668131  | 0.160658  | 1.40994   |
| O  | -3.08431  | -0.810769 | -1.296543 |
| O  | -2.649543 | 0.87066   | 0.84738   |
| H  | 1.650029  | -1.618582 | -1.266793 |
| H  | -1.964409 | -0.777579 | 1.880107  |
| H  | -2.153199 | -2.222579 | -0.157982 |
| H  | -0.658407 | -0.823127 | -1.512203 |
| H  | 0.165876  | -1.745766 | 0.786578  |
| H  | -3.514536 | 0.044023  | -1.154165 |
| H  | 3.163613  | 0.389009  | 0.442959  |
| H  | 3.58828   | -0.161688 | -1.170926 |
| H  | 1.197219  | -0.242144 | 2.108775  |
| H  | -1.866517 | 1.190394  | 0.071978  |
| H  | 2.050941  | 1.245656  | -1.992411 |
| H  | 2.526903  | -2.859663 | 0.323439  |
| Na | 0.667482  | 2.273254  | 0.415384  |

#### 74. Transition States of 4th Man-L1 C-C cleavage

25

|    |           |           |           |
|----|-----------|-----------|-----------|
| C  | -2.962635 | 0.845411  | 0.064701  |
| C  | -1.855876 | 0.912826  | -0.765471 |
| C  | -0.696848 | 0.045667  | 0.639889  |
| O  | -1.198472 | -1.13085  | 0.828772  |
| C  | 0.621408  | 0.145169  | -0.107486 |
| C  | 1.777864  | 0.221358  | 0.910422  |
| C  | 3.098     | -0.161127 | 0.240599  |
| O  | 3.164207  | 0.309657  | -1.094343 |
| O  | 1.756013  | 1.572896  | 1.326766  |
| O  | 0.737857  | -0.984759 | -0.967387 |
| O  | -1.323141 | 2.094063  | -1.188843 |
| O  | -3.45125  | -0.274466 | 0.490191  |
| H  | 1.596459  | -0.453988 | 1.758088  |
| H  | -3.394703 | 1.755154  | 0.490444  |
| H  | -1.649494 | 0.101482  | -1.454375 |
| H  | -0.761451 | 0.776992  | 1.45373   |
| H  | 0.663563  | 1.070184  | -0.686065 |
| H  | -1.684006 | 2.847168  | -0.708226 |
| H  | 3.934481  | 0.209919  | 0.840535  |
| H  | 3.187562  | -1.247469 | 0.184615  |
| H  | 1.465748  | -0.781589 | -1.575297 |
| H  | -2.636363 | -0.904239 | 0.648995  |
| H  | 3.372079  | 1.24901   | -1.104182 |
| H  | 2.261072  | 1.681595  | 2.137788  |
| Na | -0.338921 | -2.822944 | -0.276656 |

75. Reactant of 4th Man-L1 C-C cleavage

25

|    |           |           |           |
|----|-----------|-----------|-----------|
| C  | -2.962635 | 0.845411  | 0.064701  |
| C  | -1.855876 | 0.912826  | -0.765471 |
| C  | -0.696848 | 0.045667  | 0.639889  |
| O  | -1.198472 | -1.13085  | 0.828772  |
| C  | 0.621408  | 0.145169  | -0.107486 |
| C  | 1.777864  | 0.221358  | 0.910422  |
| C  | 3.098     | -0.161127 | 0.240599  |
| O  | 3.164207  | 0.309657  | -1.094343 |
| O  | 1.756013  | 1.572896  | 1.326766  |
| O  | 0.737857  | -0.984759 | -0.967387 |
| O  | -1.323141 | 2.094063  | -1.188843 |
| O  | -3.45125  | -0.274466 | 0.490191  |
| H  | 1.596459  | -0.453988 | 1.758088  |
| H  | -3.394703 | 1.755154  | 0.490444  |
| H  | -1.649494 | 0.101482  | -1.454375 |
| H  | -0.761451 | 0.776992  | 1.45373   |
| H  | 0.663563  | 1.070184  | -0.686065 |
| H  | -1.684006 | 2.847168  | -0.708226 |
| H  | 3.934481  | 0.209919  | 0.840535  |
| H  | 3.187562  | -1.247469 | 0.184615  |
| H  | 1.465748  | -0.781589 | -1.575297 |
| H  | -2.636363 | -0.904239 | 0.648995  |
| H  | 3.372079  | 1.24901   | -1.104182 |
| H  | 2.261072  | 1.681595  | 2.137788  |
| Na | -0.338921 | -2.822944 | -0.276656 |

## 76. Transition States of 1st Man-L1 C=O Migration

25

|    |           |           |           |
|----|-----------|-----------|-----------|
| C  | 2.366085  | -1.267747 | -0.020077 |
| C  | 1.696739  | -0.020467 | 0.207257  |
| C  | 0.618687  | 0.053088  | 1.284319  |
| O  | 0.45586   | 1.433679  | 1.572781  |
| C  | -0.673274 | -0.636531 | 0.800128  |
| C  | -1.194975 | -0.179262 | -0.573637 |
| C  | -2.477858 | -0.901536 | -0.948328 |
| O  | -3.438853 | -0.475524 | 0.008298  |
| O  | -1.445236 | 1.226551  | -0.580793 |
| O  | -0.326405 | -2.009273 | 0.724631  |
| O  | 1.681448  | 0.810944  | -0.78523  |
| O  | 2.997729  | -1.389849 | -1.133941 |
| H  | -0.43155  | -0.377756 | -1.328218 |
| H  | 2.445686  | -2.07168  | 0.70347   |
| H  | 2.771667  | -0.028061 | 0.842628  |
| H  | 0.94566   | -0.49137  | 2.175961  |
| H  | -1.452273 | -0.461199 | 1.551496  |
| H  | 2.756917  | -0.593413 | -1.667266 |
| H  | -2.769605 | -0.603978 | -1.959715 |
| H  | -2.330023 | -1.984547 | -0.925847 |
| H  | -1.041018 | -2.559994 | 1.054694  |
| H  | -0.002676 | 1.539056  | 2.41143   |
| H  | -4.318838 | -0.767105 | -0.243481 |
| H  | -2.346606 | 1.349978  | -0.251653 |
| Na | 0.396717  | 2.544779  | -0.482495 |



77. Reactant of 1st Man-L1 C=O Migration

25

|    |           |           |           |
|----|-----------|-----------|-----------|
| C  | 2.366085  | -1.267747 | -0.020077 |
| C  | 1.696739  | -0.020467 | 0.207257  |
| C  | 0.618687  | 0.053088  | 1.284319  |
| O  | 0.45586   | 1.433679  | 1.572781  |
| C  | -0.673274 | -0.636531 | 0.800128  |
| C  | -1.194975 | -0.179262 | -0.573637 |
| C  | -2.477858 | -0.901536 | -0.948328 |
| O  | -3.438853 | -0.475524 | 0.008298  |
| O  | -1.445236 | 1.226551  | -0.580793 |
| O  | -0.326405 | -2.009273 | 0.724631  |
| O  | 1.681448  | 0.810944  | -0.78523  |
| O  | 2.997729  | -1.389849 | -1.133941 |
| H  | -0.43155  | -0.377756 | -1.328218 |
| H  | 2.445686  | -2.07168  | 0.70347   |
| H  | 2.771667  | -0.028061 | 0.842628  |
| H  | 0.94566   | -0.49137  | 2.175961  |
| H  | -1.452273 | -0.461199 | 1.551496  |
| H  | 2.756917  | -0.593413 | -1.667266 |
| H  | -2.769605 | -0.603978 | -1.959715 |
| H  | -2.330023 | -1.984547 | -0.925847 |
| H  | -1.041018 | -2.559994 | 1.054694  |
| H  | -0.002676 | 1.539056  | 2.41143   |
| H  | -4.318838 | -0.767105 | -0.243481 |
| H  | -2.346606 | 1.349978  | -0.251653 |
| Na | 0.396717  | 2.544779  | -0.482495 |

## 78. Transition States of 2nd Man-L1 C=O Migration

25

|    |           |           |           |
|----|-----------|-----------|-----------|
| C  | -2.494877 | -0.897792 | -0.004574 |
| C  | -1.32286  | -0.067147 | 0.106343  |
| C  | -0.30621  | -0.458274 | 1.197952  |
| O  | -0.228041 | -1.851285 | 1.334705  |
| C  | 1.086762  | 0.201661  | 1.113837  |
| C  | 1.934036  | 0.071917  | -0.160285 |
| C  | 2.295952  | -1.343491 | -0.575343 |
| O  | 1.108057  | -1.954335 | -1.08972  |
| O  | 1.339549  | 0.770263  | -1.24838  |
| O  | 0.97646   | 1.612983  | 1.327189  |
| O  | -1.475448 | 1.143214  | -0.332195 |
| O  | -3.486956 | -0.391692 | -0.644281 |
| H  | 2.868031  | 0.594308  | 0.064078  |
| H  | -2.566438 | -1.925993 | 0.332275  |
| H  | -1.130047 | -0.918868 | -0.784934 |
| H  | -0.738478 | -0.089937 | 2.134563  |
| H  | 1.66851   | -0.251965 | 1.924609  |
| H  | -3.239358 | 0.557762  | -0.789054 |
| H  | 3.058279  | -1.294332 | -1.355443 |
| H  | 2.685871  | -1.90674  | 0.277431  |
| H  | 0.852876  | 1.79854   | 2.262681  |
| H  | 0.166292  | -2.218945 | 0.530008  |
| H  | 1.332566  | -2.703249 | -1.651073 |
| H  | 0.828536  | 0.137014  | -1.768613 |
| Na | 0.107961  | 2.59527   | -0.547513 |

79. Reactant of 2nd Man-L1 C=O Migration

25

|    |           |           |           |
|----|-----------|-----------|-----------|
| C  | -2.494877 | -0.897792 | -0.004574 |
| C  | -1.32286  | -0.067147 | 0.106343  |
| C  | -0.30621  | -0.458274 | 1.197952  |
| O  | -0.228041 | -1.851285 | 1.334705  |
| C  | 1.086762  | 0.201661  | 1.113837  |
| C  | 1.934036  | 0.071917  | -0.160285 |
| C  | 2.295952  | -1.343491 | -0.575343 |
| O  | 1.108057  | -1.954335 | -1.08972  |
| O  | 1.339549  | 0.770263  | -1.24838  |
| O  | 0.97646   | 1.612983  | 1.327189  |
| O  | -1.475448 | 1.143214  | -0.332195 |
| O  | -3.486956 | -0.391692 | -0.644281 |
| H  | 2.868031  | 0.594308  | 0.064078  |
| H  | -2.566438 | -1.925993 | 0.332275  |
| H  | -1.130047 | -0.918868 | -0.784934 |
| H  | -0.738478 | -0.089937 | 2.134563  |
| H  | 1.66851   | -0.251965 | 1.924609  |
| H  | -3.239358 | 0.557762  | -0.789054 |
| H  | 3.058279  | -1.294332 | -1.355443 |
| H  | 2.685871  | -1.90674  | 0.277431  |
| H  | 0.852876  | 1.79854   | 2.262681  |
| H  | 0.166292  | -2.218945 | 0.530008  |
| H  | 1.332566  | -2.703249 | -1.651073 |
| H  | 0.828536  | 0.137014  | -1.768613 |
| Na | 0.107961  | 2.59527   | -0.547513 |

## 80. Transition States of 3rd Man-L1 C=O Migration

25

|    |           |           |           |
|----|-----------|-----------|-----------|
| C  | 2.534569  | -1.372235 | 0.579424  |
| C  | 1.774848  | -0.155744 | 0.435312  |
| C  | 0.277659  | -0.134628 | 0.733561  |
| O  | -0.000248 | 1.192817  | 1.137252  |
| C  | -0.528956 | -0.527277 | -0.519092 |
| C  | -1.962259 | -1.00469  | -0.251057 |
| C  | -2.870534 | 0.002584  | 0.448629  |
| O  | -2.396041 | 0.204756  | 1.778336  |
| O  | -2.459169 | -1.251262 | -1.554764 |
| O  | -0.559503 | 0.586027  | -1.401775 |
| O  | 2.283029  | 0.69726   | -0.400225 |
| O  | 3.662089  | -1.389488 | -0.024482 |
| H  | -1.915163 | -1.924168 | 0.344901  |
| H  | 2.298118  | -2.203256 | 1.237661  |
| H  | 2.28755   | -0.115794 | 1.553102  |
| H  | 0.046029  | -0.843541 | 1.537394  |
| H  | -0.018496 | -1.366268 | -1.009121 |
| H  | 3.659564  | -0.560644 | -0.579662 |
| H  | -2.877186 | 0.944228  | -0.108578 |
| H  | -3.887054 | -0.39946  | 0.462136  |
| H  | -1.103728 | 0.331985  | -2.158891 |
| H  | -0.859019 | 1.17604   | 1.59219   |
| H  | -3.124708 | 0.406447  | 2.371066  |
| H  | -3.281314 | -1.748683 | -1.529312 |
| Na | 0.834745  | 2.284925  | -0.777116 |

81. Reactant of 3rd Man-L1 C=O Migration

25

|    |           |           |           |
|----|-----------|-----------|-----------|
| C  | 2.534569  | -1.372235 | 0.579424  |
| C  | 1.774848  | -0.155744 | 0.435312  |
| C  | 0.277659  | -0.134628 | 0.733561  |
| O  | -0.000248 | 1.192817  | 1.137252  |
| C  | -0.528956 | -0.527277 | -0.519092 |
| C  | -1.962259 | -1.00469  | -0.251057 |
| C  | -2.870534 | 0.002584  | 0.448629  |
| O  | -2.396041 | 0.204756  | 1.778336  |
| O  | -2.459169 | -1.251262 | -1.554764 |
| O  | -0.559503 | 0.586027  | -1.401775 |
| O  | 2.283029  | 0.69726   | -0.400225 |
| O  | 3.662089  | -1.389488 | -0.024482 |
| H  | -1.915163 | -1.924168 | 0.344901  |
| H  | 2.298118  | -2.203256 | 1.237661  |
| H  | 2.28755   | -0.115794 | 1.553102  |
| H  | 0.046029  | -0.843541 | 1.537394  |
| H  | -0.018496 | -1.366268 | -1.009121 |
| H  | 3.659564  | -0.560644 | -0.579662 |
| H  | -2.877186 | 0.944228  | -0.108578 |
| H  | -3.887054 | -0.39946  | 0.462136  |
| H  | -1.103728 | 0.331985  | -2.158891 |
| H  | -0.859019 | 1.17604   | 1.59219   |
| H  | -3.124708 | 0.406447  | 2.371066  |
| H  | -3.281314 | -1.748683 | -1.529312 |
| Na | 0.834745  | 2.284925  | -0.777116 |

## 82. Transition States of 4th Man-L1 C=O Migration

25

|    |           |           |           |
|----|-----------|-----------|-----------|
| C  | 3.056937  | -0.063655 | -0.000293 |
| C  | 1.624908  | -0.134958 | -0.121205 |
| C  | 0.794285  | 1.041168  | 0.40074   |
| O  | 1.527537  | 2.196109  | 0.06497   |
| C  | -0.611652 | 1.045589  | -0.259371 |
| C  | -1.723728 | 0.520607  | 0.661803  |
| C  | -2.94547  | 0.105065  | -0.140448 |
| O  | -2.580493 | -1.071406 | -0.874994 |
| O  | -1.251209 | -0.594164 | 1.421857  |
| O  | -1.028263 | 2.362138  | -0.552456 |
| O  | 1.135433  | -1.334866 | -0.224474 |
| O  | 3.69547   | -1.165885 | -0.153354 |
| H  | -1.990968 | 1.348284  | 1.325712  |
| H  | 3.625714  | 0.854757  | 0.094941  |
| H  | 2.055931  | 0.320576  | -1.182029 |
| H  | 0.701848  | 0.935189  | 1.48696   |
| H  | -0.574532 | 0.444151  | -1.176051 |
| H  | 2.996636  | -1.86708  | -0.180875 |
| H  | -3.782546 | -0.119622 | 0.526335  |
| H  | -3.223804 | 0.917204  | -0.816159 |
| H  | -0.550553 | 2.688281  | -1.321272 |
| H  | 1.109806  | 2.967986  | 0.460443  |
| H  | -3.238263 | -1.243821 | -1.553964 |
| H  | -1.650668 | -0.58667  | 2.295803  |
| Na | -0.78528  | -2.261594 | -0.059963 |

83. Reactant of 4th Man-L1 C=O Migration

25

|    |           |           |           |
|----|-----------|-----------|-----------|
| C  | 3.056937  | -0.063655 | -0.000293 |
| C  | 1.624908  | -0.134958 | -0.121205 |
| C  | 0.794285  | 1.041168  | 0.40074   |
| O  | 1.527537  | 2.196109  | 0.06497   |
| C  | -0.611652 | 1.045589  | -0.259371 |
| C  | -1.723728 | 0.520607  | 0.661803  |
| C  | -2.94547  | 0.105065  | -0.140448 |
| O  | -2.580493 | -1.071406 | -0.874994 |
| O  | -1.251209 | -0.594164 | 1.421857  |
| O  | -1.028263 | 2.362138  | -0.552456 |
| O  | 1.135433  | -1.334866 | -0.224474 |
| O  | 3.69547   | -1.165885 | -0.153354 |
| H  | -1.990968 | 1.348284  | 1.325712  |
| H  | 3.625714  | 0.854757  | 0.094941  |
| H  | 2.055931  | 0.320576  | -1.182029 |
| H  | 0.701848  | 0.935189  | 1.48696   |
| H  | -0.574532 | 0.444151  | -1.176051 |
| H  | 2.996636  | -1.86708  | -0.180875 |
| H  | -3.782546 | -0.119622 | 0.526335  |
| H  | -3.223804 | 0.917204  | -0.816159 |
| H  | -0.550553 | 2.688281  | -1.321272 |
| H  | 1.109806  | 2.967986  | 0.460443  |
| H  | -3.238263 | -1.243821 | -1.553964 |
| H  | -1.650668 | -0.58667  | 2.295803  |
| Na | -0.78528  | -2.261594 | -0.059963 |

#### 84. Transition States of 1st Gal-L1 C-C cleavage

25

|    |           |           |           |
|----|-----------|-----------|-----------|
| C  | 2.690262  | -0.711094 | 0.498385  |
| C  | 2.446967  | 0.03744   | -0.641928 |
| C  | 0.428419  | -0.077258 | -0.502985 |
| O  | 0.16754   | -1.334156 | -0.464351 |
| C  | 0.019824  | 0.804091  | 0.680535  |
| C  | -1.509703 | 0.833801  | 0.9065    |
| C  | -2.316049 | 1.280468  | -0.29686  |
| O  | -2.323703 | 0.217814  | -1.262309 |
| O  | -2.015877 | -0.434608 | 1.320208  |
| O  | 0.361602  | 2.14693   | 0.478852  |
| O  | 2.814212  | 1.370625  | -0.60868  |
| O  | 2.253505  | -1.916188 | 0.633464  |
| H  | -1.66785  | 1.582811  | 1.688512  |
| H  | 3.139091  | -0.243265 | 1.376191  |
| H  | 2.409241  | -0.452804 | -1.608829 |
| H  | 0.362462  | 0.446379  | -1.46521  |
| H  | 0.462677  | 0.390195  | 1.598267  |
| H  | 3.500853  | 1.568368  | -1.254073 |
| H  | -3.339387 | 1.49758   | 0.017432  |
| H  | -1.855577 | 2.179374  | -0.712386 |
| H  | 1.294525  | 2.227218  | 0.240395  |
| H  | 1.383878  | -1.98433  | 0.073666  |
| H  | -2.726952 | 0.534404  | -2.075467 |
| H  | -1.855827 | -0.56278  | 2.259439  |
| Na | -1.97488  | -1.871925 | -0.434299 |



85. Reactant of 1st Gal-L1 C-C cleavage

25

|    |           |           |           |
|----|-----------|-----------|-----------|
| C  | 2.690262  | -0.711094 | 0.498385  |
| C  | 2.446967  | 0.03744   | -0.641928 |
| C  | 0.428419  | -0.077258 | -0.502985 |
| O  | 0.16754   | -1.334156 | -0.464351 |
| C  | 0.019824  | 0.804091  | 0.680535  |
| C  | -1.509703 | 0.833801  | 0.9065    |
| C  | -2.316049 | 1.280468  | -0.29686  |
| O  | -2.323703 | 0.217814  | -1.262309 |
| O  | -2.015877 | -0.434608 | 1.320208  |
| O  | 0.361602  | 2.14693   | 0.478852  |
| O  | 2.814212  | 1.370625  | -0.60868  |
| O  | 2.253505  | -1.916188 | 0.633464  |
| H  | -1.66785  | 1.582811  | 1.688512  |
| H  | 3.139091  | -0.243265 | 1.376191  |
| H  | 2.409241  | -0.452804 | -1.608829 |
| H  | 0.362462  | 0.446379  | -1.46521  |
| H  | 0.462677  | 0.390195  | 1.598267  |
| H  | 3.500853  | 1.568368  | -1.254073 |
| H  | -3.339387 | 1.49758   | 0.017432  |
| H  | -1.855577 | 2.179374  | -0.712386 |
| H  | 1.294525  | 2.227218  | 0.240395  |
| H  | 1.383878  | -1.98433  | 0.073666  |
| H  | -2.726952 | 0.534404  | -2.075467 |
| H  | -1.855827 | -0.56278  | 2.259439  |
| Na | -1.97488  | -1.871925 | -0.434299 |

86. Transition States of 2nd Gal-L1 C-C cleavage

25

|    |           |           |           |
|----|-----------|-----------|-----------|
| C  | -2.492263 | 1.412612  | 0.0728    |
| C  | -1.276999 | 1.179737  | -0.557355 |
| C  | -0.699507 | 0.174602  | 1.141297  |
| O  | -1.535187 | -0.807032 | 1.180534  |
| C  | 0.754102  | -0.199382 | 0.817052  |
| C  | 1.640083  | 0.922379  | 0.23687   |
| C  | 3.106525  | 0.671554  | 0.547752  |
| O  | 3.415583  | -0.577565 | -0.069844 |
| O  | 1.456418  | 1.025059  | -1.168757 |
| O  | 0.776841  | -1.352594 | -0.008993 |
| O  | -1.150769 | 0.133593  | -1.446073 |
| O  | -3.333455 | 0.468977  | 0.298217  |
| H  | 1.347113  | 1.877335  | 0.685149  |
| H  | -2.661737 | 2.386195  | 0.537048  |
| H  | -0.619805 | 2.02355   | -0.731429 |
| H  | -0.757266 | 0.93717   | 1.926427  |
| H  | 1.153625  | -0.462136 | 1.808209  |
| H  | -0.237828 | 0.203283  | -1.771956 |
| H  | 3.714865  | 1.475629  | 0.124371  |
| H  | 3.264163  | 0.62934   | 1.629043  |
| H  | 1.706739  | -1.604178 | -0.113553 |
| H  | -2.69394  | -0.305757 | 0.752068  |
| H  | 4.353554  | -0.775831 | 0.004957  |
| H  | 2.170125  | 0.540012  | -1.601262 |
| Na | -1.2697   | -2.092465 | -0.643658 |

87. Reactant of 2nd Gal-L1 C-C cleavage

25

|    |           |           |           |
|----|-----------|-----------|-----------|
| C  | -2.492263 | 1.412612  | 0.0728    |
| C  | -1.276999 | 1.179737  | -0.557355 |
| C  | -0.699507 | 0.174602  | 1.141297  |
| O  | -1.535187 | -0.807032 | 1.180534  |
| C  | 0.754102  | -0.199382 | 0.817052  |
| C  | 1.640083  | 0.922379  | 0.23687   |
| C  | 3.106525  | 0.671554  | 0.547752  |
| O  | 3.415583  | -0.577565 | -0.069844 |
| O  | 1.456418  | 1.025059  | -1.168757 |
| O  | 0.776841  | -1.352594 | -0.008993 |
| O  | -1.150769 | 0.133593  | -1.446073 |
| O  | -3.333455 | 0.468977  | 0.298217  |
| H  | 1.347113  | 1.877335  | 0.685149  |
| H  | -2.661737 | 2.386195  | 0.537048  |
| H  | -0.619805 | 2.02355   | -0.731429 |
| H  | -0.757266 | 0.93717   | 1.926427  |
| H  | 1.153625  | -0.462136 | 1.808209  |
| H  | -0.237828 | 0.203283  | -1.771956 |
| H  | 3.714865  | 1.475629  | 0.124371  |
| H  | 3.264163  | 0.62934   | 1.629043  |
| H  | 1.706739  | -1.604178 | -0.113553 |
| H  | -2.69394  | -0.305757 | 0.752068  |
| H  | 4.353554  | -0.775831 | 0.004957  |
| H  | 2.170125  | 0.540012  | -1.601262 |
| Na | -1.2697   | -2.092465 | -0.643658 |

88. Transition States of 3rd Gal-L1 C-C cleavage

25

|    |           |           |           |
|----|-----------|-----------|-----------|
| C  | -2.513634 | 1.376638  | 0.147099  |
| C  | -1.306505 | 1.199015  | -0.513771 |
| C  | -0.674944 | 0.146159  | 1.145996  |
| O  | -1.495638 | -0.847951 | 1.175441  |
| C  | 0.772819  | -0.209774 | 0.77371   |
| C  | 1.664143  | 0.929716  | 0.247898  |
| C  | 3.13112   | 0.622341  | 0.513592  |
| O  | 3.397076  | -0.667095 | -0.015755 |
| O  | 1.407027  | 1.07392   | -1.141911 |
| O  | 0.775888  | -1.31996  | -0.10271  |
| O  | -1.171851 | 0.190938  | -1.441928 |
| O  | -3.330056 | 0.404405  | 0.344762  |
| H  | 1.407173  | 1.853941  | 0.78381   |
| H  | -2.693123 | 2.324689  | 0.658238  |
| H  | -0.664789 | 2.059624  | -0.654547 |
| H  | -0.723021 | 0.884539  | 1.954199  |
| H  | 1.190243  | -0.516413 | 1.74543   |
| H  | -0.259838 | 0.264441  | -1.770257 |
| H  | 3.76179   | 1.382012  | 0.036794  |
| H  | 3.312859  | 0.653365  | 1.592946  |
| H  | 1.707056  | -1.522076 | -0.287456 |
| H  | -2.664725 | -0.362557 | 0.783408  |
| H  | 4.315681  | -0.913219 | 0.123463  |
| H  | 2.143135  | 1.51104   | -1.580444 |
| Na | -1.266364 | -2.061636 | -0.710538 |

89. Reactant of 3rd Gal-L1 C-C cleavage

25

|    |           |           |           |
|----|-----------|-----------|-----------|
| C  | -2.513634 | 1.376638  | 0.147099  |
| C  | -1.306505 | 1.199015  | -0.513771 |
| C  | -0.674944 | 0.146159  | 1.145996  |
| O  | -1.495638 | -0.847951 | 1.175441  |
| C  | 0.772819  | -0.209774 | 0.77371   |
| C  | 1.664143  | 0.929716  | 0.247898  |
| C  | 3.13112   | 0.622341  | 0.513592  |
| O  | 3.397076  | -0.667095 | -0.015755 |
| O  | 1.407027  | 1.07392   | -1.141911 |
| O  | 0.775888  | -1.31996  | -0.10271  |
| O  | -1.171851 | 0.190938  | -1.441928 |
| O  | -3.330056 | 0.404405  | 0.344762  |
| H  | 1.407173  | 1.853941  | 0.78381   |
| H  | -2.693123 | 2.324689  | 0.658238  |
| H  | -0.664789 | 2.059624  | -0.654547 |
| H  | -0.723021 | 0.884539  | 1.954199  |
| H  | 1.190243  | -0.516413 | 1.74543   |
| H  | -0.259838 | 0.264441  | -1.770257 |
| H  | 3.76179   | 1.382012  | 0.036794  |
| H  | 3.312859  | 0.653365  | 1.592946  |
| H  | 1.707056  | -1.522076 | -0.287456 |
| H  | -2.664725 | -0.362557 | 0.783408  |
| H  | 4.315681  | -0.913219 | 0.123463  |
| H  | 2.143135  | 1.51104   | -1.580444 |
| Na | -1.266364 | -2.061636 | -0.710538 |

90. Transition States of 4th Gal-L1 C-C cleavage

25

|    |           |           |           |
|----|-----------|-----------|-----------|
| C  | -2.328036 | -0.415337 | 0.888601  |
| C  | -2.266109 | -0.925939 | -0.392683 |
| C  | -0.841139 | 0.398052  | -1.119389 |
| O  | -1.060061 | 1.544475  | -0.615675 |
| C  | 0.518483  | -0.285328 | -0.870224 |
| C  | 0.837024  | -0.717722 | 0.564533  |
| C  | 2.125761  | -1.525636 | 0.644014  |
| O  | 3.172455  | -0.808005 | 0.008251  |
| O  | 0.892254  | 0.471785  | 1.357148  |
| O  | 1.438973  | 0.71795   | -1.302778 |
| O  | -1.75284  | -2.193709 | -0.555795 |
| O  | -2.598248 | 0.828365  | 1.123154  |
| H  | 0.038196  | -1.376094 | 0.915626  |
| H  | -2.033562 | -1.022466 | 1.745163  |
| H  | -2.954405 | -0.549469 | -1.141367 |
| H  | -1.220523 | 0.20355   | -2.128275 |
| H  | 0.577484  | -1.169562 | -1.511109 |
| H  | -2.388676 | -2.770207 | -0.991851 |
| H  | 2.368536  | -1.715422 | 1.696301  |
| H  | 1.9545    | -2.489738 | 0.152827  |
| H  | 2.328169  | 0.334725  | -1.242298 |
| H  | -2.208909 | 1.382056  | 0.355597  |
| H  | 3.994703  | -1.303543 | 0.055855  |
| H  | 1.092768  | 0.247076  | 2.270788  |
| Na | 0.857778  | 2.415787  | 0.129017  |

91. Reactant of 4th Gal-L1 C-C cleavage

25

|    |           |           |           |
|----|-----------|-----------|-----------|
| C  | -2.328036 | -0.415337 | 0.888601  |
| C  | -2.266109 | -0.925939 | -0.392683 |
| C  | -0.841139 | 0.398052  | -1.119389 |
| O  | -1.060061 | 1.544475  | -0.615675 |
| C  | 0.518483  | -0.285328 | -0.870224 |
| C  | 0.837024  | -0.717722 | 0.564533  |
| C  | 2.125761  | -1.525636 | 0.644014  |
| O  | 3.172455  | -0.808005 | 0.008251  |
| O  | 0.892254  | 0.471785  | 1.357148  |
| O  | 1.438973  | 0.71795   | -1.302778 |
| O  | -1.75284  | -2.193709 | -0.555795 |
| O  | -2.598248 | 0.828365  | 1.123154  |
| H  | 0.038196  | -1.376094 | 0.915626  |
| H  | -2.033562 | -1.022466 | 1.745163  |
| H  | -2.954405 | -0.549469 | -1.141367 |
| H  | -1.220523 | 0.20355   | -2.128275 |
| H  | 0.577484  | -1.169562 | -1.511109 |
| H  | -2.388676 | -2.770207 | -0.991851 |
| H  | 2.368536  | -1.715422 | 1.696301  |
| H  | 1.9545    | -2.489738 | 0.152827  |
| H  | 2.328169  | 0.334725  | -1.242298 |
| H  | -2.208909 | 1.382056  | 0.355597  |
| H  | 3.994703  | -1.303543 | 0.055855  |
| H  | 1.092768  | 0.247076  | 2.270788  |
| Na | 0.857778  | 2.415787  | 0.129017  |

## 92. Transition States of 1st Gal-L1 C=O Migration

25

|    |           |           |           |
|----|-----------|-----------|-----------|
| C  | 2.951162  | 1.072022  | 0.17014   |
| C  | 1.680695  | 0.395709  | 0.189662  |
| C  | 0.621353  | 0.733413  | -0.858432 |
| O  | 0.606278  | -0.378917 | -1.738968 |
| C  | -0.78323  | 0.993769  | -0.283959 |
| C  | -1.266809 | -0.014433 | 0.773844  |
| C  | -2.585531 | 0.404492  | 1.406799  |
| O  | -3.554443 | 0.384567  | 0.360987  |
| O  | -1.408274 | -1.320766 | 0.216755  |
| O  | -1.599959 | 1.004849  | -1.434133 |
| O  | 1.679731  | -0.757378 | 0.775334  |
| O  | 3.892214  | 0.543547  | 0.862139  |
| H  | -0.514067 | -0.091634 | 1.561523  |
| H  | 3.146003  | 2.033094  | -0.296612 |
| H  | 1.632384  | 1.383525  | 0.96288   |
| H  | 0.914518  | 1.636055  | -1.408585 |
| H  | -0.760003 | 1.984866  | 0.193012  |
| H  | 3.5408    | -0.334228 | 1.158075  |
| H  | -2.849351 | -0.310524 | 2.190386  |
| H  | -2.496133 | 1.403849  | 1.843657  |
| H  | -2.528535 | 1.073905  | -1.173535 |
| H  | -0.134863 | -0.227157 | -2.343355 |
| H  | -4.442187 | 0.492291  | 0.7134    |
| H  | -2.256878 | -1.344778 | -0.245146 |
| Na | 0.55619   | -2.27421  | -0.352812 |



93. Reactant of 1st Gal-L1 C=O Migration

25

|    |           |           |           |
|----|-----------|-----------|-----------|
| C  | 2.951162  | 1.072022  | 0.17014   |
| C  | 1.680695  | 0.395709  | 0.189662  |
| C  | 0.621353  | 0.733413  | -0.858432 |
| O  | 0.606278  | -0.378917 | -1.738968 |
| C  | -0.78323  | 0.993769  | -0.283959 |
| C  | -1.266809 | -0.014433 | 0.773844  |
| C  | -2.585531 | 0.404492  | 1.406799  |
| O  | -3.554443 | 0.384567  | 0.360987  |
| O  | -1.408274 | -1.320766 | 0.216755  |
| O  | -1.599959 | 1.004849  | -1.434133 |
| O  | 1.679731  | -0.757378 | 0.775334  |
| O  | 3.892214  | 0.543547  | 0.862139  |
| H  | -0.514067 | -0.091634 | 1.561523  |
| H  | 3.146003  | 2.033094  | -0.296612 |
| H  | 1.632384  | 1.383525  | 0.96288   |
| H  | 0.914518  | 1.636055  | -1.408585 |
| H  | -0.760003 | 1.984866  | 0.193012  |
| H  | 3.5408    | -0.334228 | 1.158075  |
| H  | -2.849351 | -0.310524 | 2.190386  |
| H  | -2.496133 | 1.403849  | 1.843657  |
| H  | -2.528535 | 1.073905  | -1.173535 |
| H  | -0.134863 | -0.227157 | -2.343355 |
| H  | -4.442187 | 0.492291  | 0.7134    |
| H  | -2.256878 | -1.344778 | -0.245146 |
| Na | 0.55619   | -2.27421  | -0.352812 |

#### 94. Transition States of 2nd Gal-L1 C=O Migration

25

|    |           |           |           |
|----|-----------|-----------|-----------|
| C  | 2.765074  | -0.2094   | -0.369361 |
| C  | 1.639299  | -0.005644 | 0.491258  |
| C  | 0.880204  | 1.324566  | 0.40702   |
| O  | 1.711279  | 2.22453   | -0.287509 |
| C  | -0.46407  | 1.107324  | -0.320537 |
| C  | -1.642337 | 0.811657  | 0.629861  |
| C  | -2.948656 | 0.559336  | -0.110323 |
| O  | -2.823314 | -0.663051 | -0.848948 |
| O  | -1.457235 | -0.318118 | 1.461648  |
| O  | -0.253479 | 0.089017  | -1.297042 |
| O  | 1.059078  | -1.073241 | 0.952872  |
| O  | 3.214418  | -1.413764 | -0.465246 |
| H  | -1.784746 | 1.714584  | 1.239363  |
| H  | 3.313818  | 0.583148  | -0.86385  |
| H  | 2.679564  | 0.321828  | 1.092085  |
| H  | 0.681164  | 1.677119  | 1.426029  |
| H  | -0.691695 | 2.054806  | -0.821529 |
| H  | 2.579436  | -1.981978 | 0.028852  |
| H  | -3.748177 | 0.470584  | 0.628133  |
| H  | -3.171481 | 1.393032  | -0.78382  |
| H  | -0.873757 | 0.207863  | -2.023533 |
| H  | 1.583408  | 3.123792  | 0.02579   |
| H  | -3.695184 | -0.943938 | -1.140806 |
| H  | -0.544409 | -0.373691 | 1.790011  |
| Na | -0.846454 | -1.867016 | -0.099131 |

95. Reactant of 2nd Gal-L1 C=O Migration

25

|    |           |           |           |
|----|-----------|-----------|-----------|
| C  | 2.765074  | -0.2094   | -0.369361 |
| C  | 1.639299  | -0.005644 | 0.491258  |
| C  | 0.880204  | 1.324566  | 0.40702   |
| O  | 1.711279  | 2.22453   | -0.287509 |
| C  | -0.46407  | 1.107324  | -0.320537 |
| C  | -1.642337 | 0.811657  | 0.629861  |
| C  | -2.948656 | 0.559336  | -0.110323 |
| O  | -2.823314 | -0.663051 | -0.848948 |
| O  | -1.457235 | -0.318118 | 1.461648  |
| O  | -0.253479 | 0.089017  | -1.297042 |
| O  | 1.059078  | -1.073241 | 0.952872  |
| O  | 3.214418  | -1.413764 | -0.465246 |
| H  | -1.784746 | 1.714584  | 1.239363  |
| H  | 3.313818  | 0.583148  | -0.86385  |
| H  | 2.679564  | 0.321828  | 1.092085  |
| H  | 0.681164  | 1.677119  | 1.426029  |
| H  | -0.691695 | 2.054806  | -0.821529 |
| H  | 2.579436  | -1.981978 | 0.028852  |
| H  | -3.748177 | 0.470584  | 0.628133  |
| H  | -3.171481 | 1.393032  | -0.78382  |
| H  | -0.873757 | 0.207863  | -2.023533 |
| H  | 1.583408  | 3.123792  | 0.02579   |
| H  | -3.695184 | -0.943938 | -1.140806 |
| H  | -0.544409 | -0.373691 | 1.790011  |
| Na | -0.846454 | -1.867016 | -0.099131 |

96. Transition States of 3rd Gal-L1 C=O Migration

25

|    |           |           |           |
|----|-----------|-----------|-----------|
| C  | 2.847935  | -0.728633 | -0.148004 |
| C  | 1.49026   | -0.243011 | -0.202871 |
| C  | 0.402224  | -1.273723 | 0.098945  |
| O  | 0.12392   | -1.16011  | 1.481501  |
| C  | -0.886017 | -1.259918 | -0.741326 |
| C  | -1.846153 | -0.053174 | -0.707226 |
| C  | -2.309217 | 0.410007  | 0.672348  |
| O  | -1.324371 | 1.164791  | 1.355026  |
| O  | -1.299908 | 1.07792   | -1.388032 |
| O  | -1.575637 | -2.387986 | -0.22576  |
| O  | 1.369445  | 1.026507  | -0.029156 |
| O  | 3.770832  | 0.158105  | -0.072644 |
| H  | -2.748086 | -0.389604 | -1.234455 |
| H  | 3.151905  | -1.765777 | -0.251106 |
| H  | 1.866581  | -0.584297 | -1.355579 |
| H  | 0.835278  | -2.262593 | -0.103609 |
| H  | -0.588686 | -1.423045 | -1.786846 |
| H  | 3.292667  | 1.011029  | 0.087756  |
| H  | -3.168513 | 1.068914  | 0.540393  |
| H  | -2.628933 | -0.455289 | 1.258378  |
| H  | -2.248449 | -2.700668 | -0.837163 |
| H  | -0.408296 | -1.923527 | 1.740402  |
| H  | -0.680994 | 0.539224  | 1.724989  |
| H  | -1.465865 | 1.011919  | -2.331928 |
| Na | -0.174277 | 2.520964  | -0.02272  |

97. Reactant of 3rd Gal-L1 C=O Migration

25

|    |           |           |           |
|----|-----------|-----------|-----------|
| C  | 2.847935  | -0.728633 | -0.148004 |
| C  | 1.49026   | -0.243011 | -0.202871 |
| C  | 0.402224  | -1.273723 | 0.098945  |
| O  | 0.12392   | -1.16011  | 1.481501  |
| C  | -0.886017 | -1.259918 | -0.741326 |
| C  | -1.846153 | -0.053174 | -0.707226 |
| C  | -2.309217 | 0.410007  | 0.672348  |
| O  | -1.324371 | 1.164791  | 1.355026  |
| O  | -1.299908 | 1.07792   | -1.388032 |
| O  | -1.575637 | -2.387986 | -0.22576  |
| O  | 1.369445  | 1.026507  | -0.029156 |
| O  | 3.770832  | 0.158105  | -0.072644 |
| H  | -2.748086 | -0.389604 | -1.234455 |
| H  | 3.151905  | -1.765777 | -0.251106 |
| H  | 1.866581  | -0.584297 | -1.355579 |
| H  | 0.835278  | -2.262593 | -0.103609 |
| H  | -0.588686 | -1.423045 | -1.786846 |
| H  | 3.292667  | 1.011029  | 0.087756  |
| H  | -3.168513 | 1.068914  | 0.540393  |
| H  | -2.628933 | -0.455289 | 1.258378  |
| H  | -2.248449 | -2.700668 | -0.837163 |
| H  | -0.408296 | -1.923527 | 1.740402  |
| H  | -0.680994 | 0.539224  | 1.724989  |
| H  | -1.465865 | 1.011919  | -2.331928 |
| Na | -0.174277 | 2.520964  | -0.02272  |

98. Transition States of 4th Gal-L1 C=O Migration

25

|    |           |           |           |
|----|-----------|-----------|-----------|
| C  | 2.702547  | 0.474797  | -0.70987  |
| C  | 1.832114  | 0.116387  | 0.374696  |
| C  | 0.625682  | 1.007927  | 0.685056  |
| O  | 0.914879  | 2.378791  | 0.518706  |
| C  | -0.559504 | 0.700297  | -0.262504 |
| C  | -1.865248 | 0.576473  | 0.528061  |
| C  | -3.101654 | 0.618323  | -0.356171 |
| O  | -2.937128 | -0.313661 | -1.415118 |
| O  | -1.760362 | -0.653491 | 1.255919  |
| O  | -0.307851 | -0.491751 | -0.99466  |
| O  | 1.821891  | -1.131965 | 0.71684   |
| O  | 3.498169  | -0.440769 | -1.1343   |
| H  | -1.923095 | 1.420363  | 1.226025  |
| H  | 2.81017   | 1.476236  | -1.113613 |
| H  | 2.781022  | 0.763713  | 0.841765  |
| H  | 0.344     | 0.778373  | 1.717946  |
| H  | -0.631534 | 1.552566  | -0.945956 |
| H  | 3.214567  | -1.268777 | -0.673464 |
| H  | -3.989108 | 0.378168  | 0.239981  |
| H  | -3.211325 | 1.636609  | -0.744876 |
| H  | -1.054022 | -0.600614 | -1.604321 |
| H  | 1.242657  | 2.758072  | 1.339183  |
| H  | -3.709134 | -0.308222 | -1.987603 |
| H  | -2.469678 | -0.710034 | 1.903157  |
| Na | -0.094993 | -2.147173 | 0.606097  |

99. Reactant of 4th Gal-L1 C=O Migration

25

|    |           |           |           |
|----|-----------|-----------|-----------|
| C  | 2.702547  | 0.474797  | -0.70987  |
| C  | 1.832114  | 0.116387  | 0.374696  |
| C  | 0.625682  | 1.007927  | 0.685056  |
| O  | 0.914879  | 2.378791  | 0.518706  |
| C  | -0.559504 | 0.700297  | -0.262504 |
| C  | -1.865248 | 0.576473  | 0.528061  |
| C  | -3.101654 | 0.618323  | -0.356171 |
| O  | -2.937128 | -0.313661 | -1.415118 |
| O  | -1.760362 | -0.653491 | 1.255919  |
| O  | -0.307851 | -0.491751 | -0.99466  |
| O  | 1.821891  | -1.131965 | 0.71684   |
| O  | 3.498169  | -0.440769 | -1.1343   |
| H  | -1.923095 | 1.420363  | 1.226025  |
| H  | 2.81017   | 1.476236  | -1.113613 |
| H  | 2.781022  | 0.763713  | 0.841765  |
| H  | 0.344     | 0.778373  | 1.717946  |
| H  | -0.631534 | 1.552566  | -0.945956 |
| H  | 3.214567  | -1.268777 | -0.673464 |
| H  | -3.989108 | 0.378168  | 0.239981  |
| H  | -3.211325 | 1.636609  | -0.744876 |
| H  | -1.054022 | -0.600614 | -1.604321 |
| H  | 1.242657  | 2.758072  | 1.339183  |
| H  | -3.709134 | -0.308222 | -1.987603 |
| H  | -2.469678 | -0.710034 | 1.903157  |
| Na | -0.094993 | -2.147173 | 0.606097  |

100. Transition States of 1st Gal-L2 C-C cleavage

25

|    |           |           |           |
|----|-----------|-----------|-----------|
| C  | 3.17324   | -0.460036 | -0.675827 |
| C  | 2.000481  | -0.710638 | 0.226367  |
| C  | 1.262726  | 0.248771  | 0.905493  |
| O  | 1.552932  | 1.571697  | 0.98442   |
| C  | -0.25911  | 0.003018  | -0.447102 |
| C  | -1.191362 | 1.028119  | 0.20123   |
| C  | -2.282315 | 1.443575  | -0.783922 |
| O  | -3.094389 | 0.300952  | -1.051534 |
| O  | -1.782061 | 0.400673  | 1.338245  |
| O  | -0.616527 | -1.22814  | -0.42731  |
| O  | 1.597554  | -1.953639 | 0.243574  |
| O  | 3.513569  | 0.911283  | -0.663753 |
| H  | -0.618634 | 1.91473   | 0.48308   |
| H  | 2.900744  | -0.804867 | -1.681369 |
| H  | 0.628374  | -0.102787 | 1.712808  |
| H  | 0.239165  | 0.400323  | -1.343331 |
| H  | -2.887584 | 2.237659  | -0.335743 |
| H  | -1.824869 | 1.821926  | -1.702522 |
| H  | 0.579064  | -1.92906  | 0.022365  |
| H  | 2.345828  | 1.763242  | 0.458815  |
| H  | -3.714035 | 0.499627  | -1.758676 |
| H  | -2.017229 | 1.060051  | 1.997249  |
| H  | 4.363536  | 1.05725   | -1.086972 |
| H  | 3.99179   | -1.093927 | -0.316067 |
| Na | -2.688793 | -1.469421 | 0.327617  |



101. Reactant of 1st Gal-L2 C-C cleavage

25

|    |           |           |           |
|----|-----------|-----------|-----------|
| C  | 3.17324   | -0.460036 | -0.675827 |
| C  | 2.000481  | -0.710638 | 0.226367  |
| C  | 1.262726  | 0.248771  | 0.905493  |
| O  | 1.552932  | 1.571697  | 0.98442   |
| C  | -0.25911  | 0.003018  | -0.447102 |
| C  | -1.191362 | 1.028119  | 0.20123   |
| C  | -2.282315 | 1.443575  | -0.783922 |
| O  | -3.094389 | 0.300952  | -1.051534 |
| O  | -1.782061 | 0.400673  | 1.338245  |
| O  | -0.616527 | -1.22814  | -0.42731  |
| O  | 1.597554  | -1.953639 | 0.243574  |
| O  | 3.513569  | 0.911283  | -0.663753 |
| H  | -0.618634 | 1.91473   | 0.48308   |
| H  | 2.900744  | -0.804867 | -1.681369 |
| H  | 0.628374  | -0.102787 | 1.712808  |
| H  | 0.239165  | 0.400323  | -1.343331 |
| H  | -2.887584 | 2.237659  | -0.335743 |
| H  | -1.824869 | 1.821926  | -1.702522 |
| H  | 0.579064  | -1.92906  | 0.022365  |
| H  | 2.345828  | 1.763242  | 0.458815  |
| H  | -3.714035 | 0.499627  | -1.758676 |
| H  | -2.017229 | 1.060051  | 1.997249  |
| H  | 4.363536  | 1.05725   | -1.086972 |
| H  | 3.99179   | -1.093927 | -0.316067 |
| Na | -2.688793 | -1.469421 | 0.327617  |

## 102. Transition States of 2nd Gal-L2 C-C cleavage

25

|    |           |           |           |
|----|-----------|-----------|-----------|
| C  | 2.055334  | 1.457527  | 0.56269   |
| C  | 1.906479  | -0.027921 | 0.36312   |
| C  | 1.800825  | -0.642738 | -0.877365 |
| O  | 2.080904  | -1.960143 | -1.033681 |
| C  | -0.224577 | -0.806421 | -0.543989 |
| C  | -0.951898 | 0.486433  | -0.90141  |
| C  | -2.381694 | 0.190414  | -1.343053 |
| O  | -3.081943 | -0.351191 | -0.222412 |
| O  | -1.007836 | 1.344102  | 0.230255  |
| O  | -0.390067 | -1.295836 | 0.646094  |
| O  | 1.77239   | -0.765092 | 1.419824  |
| O  | 1.501561  | 2.160663  | -0.53942  |
| H  | -0.439473 | 0.97645   | -1.732645 |
| H  | 3.123242  | 1.670157  | 0.678685  |
| H  | 1.876516  | -0.065272 | -1.790402 |
| H  | -0.169434 | -1.528591 | -1.365561 |
| H  | -2.849873 | 1.123986  | -1.664964 |
| H  | -2.374147 | -0.520926 | -2.173682 |
| H  | 0.753651  | -1.208906 | 1.253461  |
| H  | 2.307135  | -2.353624 | -0.180099 |
| H  | -3.962335 | -0.62807  | -0.49009  |
| H  | -0.349265 | 2.040413  | 0.101249  |
| H  | 2.034358  | 2.932459  | -0.750228 |
| H  | 1.556508  | 1.728783  | 1.497894  |
| Na | -1.975797 | -0.106422 | 1.731921  |

103. Reactant of 2nd Gal-L2 C-C cleavage

25

|    |           |           |           |
|----|-----------|-----------|-----------|
| C  | 2.055334  | 1.457527  | 0.56269   |
| C  | 1.906479  | -0.027921 | 0.36312   |
| C  | 1.800825  | -0.642738 | -0.877365 |
| O  | 2.080904  | -1.960143 | -1.033681 |
| C  | -0.224577 | -0.806421 | -0.543989 |
| C  | -0.951898 | 0.486433  | -0.90141  |
| C  | -2.381694 | 0.190414  | -1.343053 |
| O  | -3.081943 | -0.351191 | -0.222412 |
| O  | -1.007836 | 1.344102  | 0.230255  |
| O  | -0.390067 | -1.295836 | 0.646094  |
| O  | 1.77239   | -0.765092 | 1.419824  |
| O  | 1.501561  | 2.160663  | -0.53942  |
| H  | -0.439473 | 0.97645   | -1.732645 |
| H  | 3.123242  | 1.670157  | 0.678685  |
| H  | 1.876516  | -0.065272 | -1.790402 |
| H  | -0.169434 | -1.528591 | -1.365561 |
| H  | -2.849873 | 1.123986  | -1.664964 |
| H  | -2.374147 | -0.520926 | -2.173682 |
| H  | 0.753651  | -1.208906 | 1.253461  |
| H  | 2.307135  | -2.353624 | -0.180099 |
| H  | -3.962335 | -0.62807  | -0.49009  |
| H  | -0.349265 | 2.040413  | 0.101249  |
| H  | 2.034358  | 2.932459  | -0.750228 |
| H  | 1.556508  | 1.728783  | 1.497894  |
| Na | -1.975797 | -0.106422 | 1.731921  |

#### 104. Transition States of 3rd Gal-L2 C-C cleavage

25

|    |           |           |           |
|----|-----------|-----------|-----------|
| C  | 1.642189  | -1.401982 | 0.935297  |
| C  | 1.879276  | -0.164961 | 0.107308  |
| C  | 1.753045  | 1.131788  | 0.590089  |
| O  | 2.301474  | 2.189177  | -0.052156 |
| C  | -0.168359 | 1.14122   | -0.322883 |
| C  | -1.18382  | 0.961917  | 0.794614  |
| C  | -2.606249 | 1.157226  | 0.257367  |
| O  | -2.934453 | 0.009946  | -0.518979 |
| O  | -1.045    | -0.346625 | 1.332478  |
| O  | -0.203502 | 0.338886  | -1.3381   |
| O  | 2.029555  | -0.334868 | -1.165295 |
| O  | 0.808616  | -2.315398 | 0.223762  |
| H  | -0.989371 | 1.72339   | 1.5561    |
| H  | 1.161721  | -1.165766 | 1.880797  |
| H  | 1.56739   | 1.318148  | 1.642739  |
| H  | 0.062493  | 2.191752  | -0.530016 |
| H  | -3.300607 | 1.251837  | 1.099274  |
| H  | -2.654354 | 2.071776  | -0.340813 |
| H  | 0.978443  | -0.015417 | -1.542531 |
| H  | 2.704509  | 1.890699  | -0.879896 |
| H  | -3.729792 | 0.181648  | -1.030763 |
| H  | -1.620441 | -0.448313 | 2.098803  |
| H  | 1.368893  | -2.828354 | -0.367738 |
| H  | 2.613446  | -1.86249  | 1.143138  |
| Na | -1.246575 | -1.599009 | -0.613956 |

105. Reactant of 3rd Gal-L2 C-C cleavage

25

|    |           |           |           |
|----|-----------|-----------|-----------|
| C  | 1.642189  | -1.401982 | 0.935297  |
| C  | 1.879276  | -0.164961 | 0.107308  |
| C  | 1.753045  | 1.131788  | 0.590089  |
| O  | 2.301474  | 2.189177  | -0.052156 |
| C  | -0.168359 | 1.14122   | -0.322883 |
| C  | -1.18382  | 0.961917  | 0.794614  |
| C  | -2.606249 | 1.157226  | 0.257367  |
| O  | -2.934453 | 0.009946  | -0.518979 |
| O  | -1.045    | -0.346625 | 1.332478  |
| O  | -0.203502 | 0.338886  | -1.3381   |
| O  | 2.029555  | -0.334868 | -1.165295 |
| O  | 0.808616  | -2.315398 | 0.223762  |
| H  | -0.989371 | 1.72339   | 1.5561    |
| H  | 1.161721  | -1.165766 | 1.880797  |
| H  | 1.56739   | 1.318148  | 1.642739  |
| H  | 0.062493  | 2.191752  | -0.530016 |
| H  | -3.300607 | 1.251837  | 1.099274  |
| H  | -2.654354 | 2.071776  | -0.340813 |
| H  | 0.978443  | -0.015417 | -1.542531 |
| H  | 2.704509  | 1.890699  | -0.879896 |
| H  | -3.729792 | 0.181648  | -1.030763 |
| H  | -1.620441 | -0.448313 | 2.098803  |
| H  | 1.368893  | -2.828354 | -0.367738 |
| H  | 2.613446  | -1.86249  | 1.143138  |
| Na | -1.246575 | -1.599009 | -0.613956 |

106. Transition States of 4th Gal-L2 C-C cleavage

25

|    |           |           |           |
|----|-----------|-----------|-----------|
| C  | -1.595684 | -1.038339 | -1.321704 |
| C  | -1.707894 | 0.163634  | -0.41453  |
| C  | -1.32411  | 1.437297  | -0.809279 |
| O  | -1.795013 | 2.548878  | -0.19924  |
| C  | 0.404516  | 1.153754  | 0.353875  |
| C  | 1.451349  | 0.384821  | -0.415279 |
| C  | 2.850412  | 0.726783  | 0.09617   |
| O  | 3.692197  | -0.183146 | -0.583835 |
| O  | 1.216512  | -1.002989 | -0.243214 |
| O  | 0.021575  | 0.687528  | 1.500872  |
| O  | -2.085903 | -0.003818 | 0.81547   |
| O  | -1.375267 | -2.211862 | -0.554996 |
| H  | 1.404692  | 0.641472  | -1.480332 |
| H  | -0.78233  | -0.895865 | -2.038312 |
| H  | -0.939258 | 1.621335  | -1.806574 |
| H  | 0.474585  | 2.24141   | 0.256373  |
| H  | 3.091648  | 1.76709   | -0.142135 |
| H  | 2.891123  | 0.579415  | 1.181239  |
| H  | -1.192261 | 0.456832  | 1.397186  |
| H  | -2.41628  | 2.313087  | 0.502661  |
| H  | 4.610516  | -0.056706 | -0.330888 |
| H  | 2.001951  | -1.457693 | -0.580998 |
| H  | -2.025989 | -2.880213 | -0.782186 |
| H  | -2.533016 | -1.11559  | -1.881478 |
| Na | -0.222702 | -1.714454 | 1.353587  |

107. Reactant of 4th Gal-L2 C-C cleavage

25

|    |           |           |           |
|----|-----------|-----------|-----------|
| C  | -1.595684 | -1.038339 | -1.321704 |
| C  | -1.707894 | 0.163634  | -0.41453  |
| C  | -1.32411  | 1.437297  | -0.809279 |
| O  | -1.795013 | 2.548878  | -0.19924  |
| C  | 0.404516  | 1.153754  | 0.353875  |
| C  | 1.451349  | 0.384821  | -0.415279 |
| C  | 2.850412  | 0.726783  | 0.09617   |
| O  | 3.692197  | -0.183146 | -0.583835 |
| O  | 1.216512  | -1.002989 | -0.243214 |
| O  | 0.021575  | 0.687528  | 1.500872  |
| O  | -2.085903 | -0.003818 | 0.81547   |
| O  | -1.375267 | -2.211862 | -0.554996 |
| H  | 1.404692  | 0.641472  | -1.480332 |
| H  | -0.78233  | -0.895865 | -2.038312 |
| H  | -0.939258 | 1.621335  | -1.806574 |
| H  | 0.474585  | 2.24141   | 0.256373  |
| H  | 3.091648  | 1.76709   | -0.142135 |
| H  | 2.891123  | 0.579415  | 1.181239  |
| H  | -1.192261 | 0.456832  | 1.397186  |
| H  | -2.41628  | 2.313087  | 0.502661  |
| H  | 4.610516  | -0.056706 | -0.330888 |
| H  | 2.001951  | -1.457693 | -0.580998 |
| H  | -2.025989 | -2.880213 | -0.782186 |
| H  | -2.533016 | -1.11559  | -1.881478 |
| Na | -0.222702 | -1.714454 | 1.353587  |

## 108. Transition States of 1st Gal-L2 C=O Migration

25

|    |           |           |           |
|----|-----------|-----------|-----------|
| C  | -2.77908  | -1.273215 | 0.065618  |
| C  | -2.196568 | 0.106174  | 0.086643  |
| C  | -0.902024 | 0.617862  | -0.308412 |
| O  | -0.747424 | 1.879757  | -0.07131  |
| C  | 0.330662  | -0.260436 | -0.526358 |
| C  | 1.03591   | -0.570009 | 0.807785  |
| C  | 2.032348  | -1.707811 | 0.640572  |
| O  | 2.859379  | -1.414575 | -0.474491 |
| O  | 1.668059  | 0.634845  | 1.238041  |
| O  | 1.180856  | 0.491611  | -1.378474 |
| O  | -3.010357 | 1.029221  | 0.495833  |
| O  | -1.812307 | -2.200102 | -0.356701 |
| H  | 0.282777  | -0.884607 | 1.539981  |
| H  | -3.66516  | -1.260903 | -0.577674 |
| H  | -1.630222 | 0.383777  | -1.317655 |
| H  | 0.046342  | -1.202676 | -0.992285 |
| H  | 2.628872  | -1.81432  | 1.554074  |
| H  | 1.471058  | -2.635192 | 0.481209  |
| H  | 1.961502  | -0.059762 | -1.539037 |
| H  | -2.44973  | 1.851789  | 0.531841  |
| H  | 3.506099  | -2.112633 | -0.607384 |
| H  | 2.086287  | 0.493313  | 2.092341  |
| H  | -2.232794 | -3.048762 | -0.521687 |
| H  | -3.115741 | -1.461408 | 1.092958  |
| Na | 1.352507  | 2.446358  | -0.177724 |



109. Reactant of 1st Gal-L2 C=O Migration

25

|    |           |           |           |
|----|-----------|-----------|-----------|
| C  | -2.77908  | -1.273215 | 0.065618  |
| C  | -2.196568 | 0.106174  | 0.086643  |
| C  | -0.902024 | 0.617862  | -0.308412 |
| O  | -0.747424 | 1.879757  | -0.07131  |
| C  | 0.330662  | -0.260436 | -0.526358 |
| C  | 1.03591   | -0.570009 | 0.807785  |
| C  | 2.032348  | -1.707811 | 0.640572  |
| O  | 2.859379  | -1.414575 | -0.474491 |
| O  | 1.668059  | 0.634845  | 1.238041  |
| O  | 1.180856  | 0.491611  | -1.378474 |
| O  | -3.010357 | 1.029221  | 0.495833  |
| O  | -1.812307 | -2.200102 | -0.356701 |
| H  | 0.282777  | -0.884607 | 1.539981  |
| H  | -3.66516  | -1.260903 | -0.577674 |
| H  | -1.630222 | 0.383777  | -1.317655 |
| H  | 0.046342  | -1.202676 | -0.992285 |
| H  | 2.628872  | -1.81432  | 1.554074  |
| H  | 1.471058  | -2.635192 | 0.481209  |
| H  | 1.961502  | -0.059762 | -1.539037 |
| H  | -2.44973  | 1.851789  | 0.531841  |
| H  | 3.506099  | -2.112633 | -0.607384 |
| H  | 2.086287  | 0.493313  | 2.092341  |
| H  | -2.232794 | -3.048762 | -0.521687 |
| H  | -3.115741 | -1.461408 | 1.092958  |
| Na | 1.352507  | 2.446358  | -0.177724 |

## 110. Transition States of 2nd Gal-L2 C=O Migration

25

|    |           |           |           |
|----|-----------|-----------|-----------|
| C  | 2.887062  | 0.055125  | -0.117549 |
| C  | 1.652105  | 0.886791  | -0.300099 |
| C  | 0.339187  | 0.793351  | 0.283797  |
| O  | -0.518352 | 1.651616  | -0.157574 |
| C  | -0.171714 | -0.47146  | 0.965481  |
| C  | -0.510592 | -1.540218 | -0.097372 |
| C  | -1.396613 | -1.074766 | -1.25013  |
| O  | -2.664113 | -0.600548 | -0.782225 |
| O  | 0.678451  | -1.953252 | -0.730688 |
| O  | -1.314293 | -0.075691 | 1.7182    |
| O  | 1.802113  | 1.883541  | -1.123626 |
| O  | 2.723628  | -0.870708 | 0.933135  |
| H  | -1.006397 | -2.37322  | 0.419872  |
| H  | 3.7241    | 0.73673   | 0.056804  |
| H  | 1.205736  | 1.300472  | 1.082732  |
| H  | 0.591033  | -0.881072 | 1.628071  |
| H  | -0.894093 | -0.274791 | -1.798376 |
| H  | -1.527723 | -1.922606 | -1.92396  |
| H  | -1.500441 | -0.737912 | 2.389486  |
| H  | 0.89974   | 2.271479  | -1.233872 |
| H  | -3.36736  | -1.060428 | -1.245424 |
| H  | 1.307225  | -2.275497 | -0.074533 |
| H  | 3.581723  | -1.08017  | 1.312469  |
| H  | 3.04581   | -0.447635 | -1.078857 |
| Na | -2.592312 | 1.324731  | 0.42755   |

111. Reactant of 2nd Gal-L2 C=O Migration

25

|    |           |           |           |
|----|-----------|-----------|-----------|
| C  | 2.887062  | 0.055125  | -0.117549 |
| C  | 1.652105  | 0.886791  | -0.300099 |
| C  | 0.339187  | 0.793351  | 0.283797  |
| O  | -0.518352 | 1.651616  | -0.157574 |
| C  | -0.171714 | -0.47146  | 0.965481  |
| C  | -0.510592 | -1.540218 | -0.097372 |
| C  | -1.396613 | -1.074766 | -1.25013  |
| O  | -2.664113 | -0.600548 | -0.782225 |
| O  | 0.678451  | -1.953252 | -0.730688 |
| O  | -1.314293 | -0.075691 | 1.7182    |
| O  | 1.802113  | 1.883541  | -1.123626 |
| O  | 2.723628  | -0.870708 | 0.933135  |
| H  | -1.006397 | -2.37322  | 0.419872  |
| H  | 3.7241    | 0.73673   | 0.056804  |
| H  | 1.205736  | 1.300472  | 1.082732  |
| H  | 0.591033  | -0.881072 | 1.628071  |
| H  | -0.894093 | -0.274791 | -1.798376 |
| H  | -1.527723 | -1.922606 | -1.92396  |
| H  | -1.500441 | -0.737912 | 2.389486  |
| H  | 0.89974   | 2.271479  | -1.233872 |
| H  | -3.36736  | -1.060428 | -1.245424 |
| H  | 1.307225  | -2.275497 | -0.074533 |
| H  | 3.581723  | -1.08017  | 1.312469  |
| H  | 3.04581   | -0.447635 | -1.078857 |
| Na | -2.592312 | 1.324731  | 0.42755   |

## 112. Transition States of 3rd Gal-L2 C=O Migration

25

C 2.882859 0.040206 -0.120064  
C 1.655252 0.882611 -0.299738  
C 0.345 0.794565 0.292127  
O -0.508084 1.663564 -0.136448  
C -0.179437 -0.477227 0.965119  
C -0.508271 -1.537952 -0.108923  
C -1.4039 -1.064444 -1.252599  
O -2.672512 -0.586349 -0.804932  
O 0.683344 -1.928889 -0.751378  
O -1.353236 -0.145226 1.700838  
O 1.81001 1.880008 -1.121508  
O 2.715251 -0.869507 0.944535  
H -0.988119 -2.377591 0.410354  
H 3.72861 0.714515 0.040213  
H 1.223807 1.290816 1.087513  
H 0.575401 -0.902459 1.625392  
H -0.91896 -0.24271 -1.780947  
H -1.526233 -1.89117 -1.954382  
H -1.175651 -0.204275 2.642786  
H 0.91141 2.276942 -1.226739  
H -3.300063 -1.312974 -0.776689  
H 1.294506 -2.307475 -0.109458  
H 3.57481 -1.093929 1.31182  
H 3.027981 -0.476513 -1.075939  
Na -2.597699 1.326496 0.391063

113. Reactant of 3rd Gal-L2 C=O Migration

25

C 2.882859 0.040206 -0.120064  
C 1.655252 0.882611 -0.299738  
C 0.345 0.794565 0.292127  
O -0.508084 1.663564 -0.136448  
C -0.179437 -0.477227 0.965119  
C -0.508271 -1.537952 -0.108923  
C -1.4039 -1.064444 -1.252599  
O -2.672512 -0.586349 -0.804932  
O 0.683344 -1.928889 -0.751378  
O -1.353236 -0.145226 1.700838  
O 1.81001 1.880008 -1.121508  
O 2.715251 -0.869507 0.944535  
H -0.988119 -2.377591 0.410354  
H 3.72861 0.714515 0.040213  
H 1.223807 1.290816 1.087513  
H 0.575401 -0.902459 1.625392  
H -0.91896 -0.24271 -1.780947  
H -1.526233 -1.89117 -1.954382  
H -1.175651 -0.204275 2.642786  
H 0.91141 2.276942 -1.226739  
H -3.300063 -1.312974 -0.776689  
H 1.294506 -2.307475 -0.109458  
H 3.57481 -1.093929 1.31182  
H 3.027981 -0.476513 -1.075939  
Na -2.597699 1.326496 0.391063

#### 114. Transition States of 4th Gal-L2 C=O Migration

25

|    |           |           |           |
|----|-----------|-----------|-----------|
| C  | -2.900728 | -0.219157 | 0.066248  |
| C  | -1.774015 | 0.749454  | 0.24095   |
| C  | -0.446125 | 0.753367  | -0.305026 |
| O  | 0.316409  | 1.702627  | 0.121016  |
| C  | 0.173325  | -0.492264 | -0.958675 |
| C  | 0.567206  | -1.56192  | 0.099949  |
| C  | 2.02681   | -1.502477 | 0.530467  |
| O  | 2.363207  | -0.230852 | 1.068502  |
| O  | -0.278418 | -1.358114 | 1.224729  |
| O  | 1.339656  | -0.08195  | -1.671968 |
| O  | -2.041287 | 1.753938  | 1.023064  |
| O  | -2.603863 | -1.122756 | -0.967886 |
| H  | 0.382794  | -2.547905 | -0.340018 |
| H  | -3.81256  | 0.354741  | -0.126335 |
| H  | -1.33475  | 1.158091  | -1.148757 |
| H  | -0.545396 | -0.938801 | -1.639643 |
| H  | 2.20833   | -2.286291 | 1.273384  |
| H  | 2.686365  | -1.678075 | -0.317604 |
| H  | 1.186785  | -0.154544 | -2.617275 |
| H  | -1.182165 | 2.227691  | 1.13966   |
| H  | 1.743147  | -0.037049 | 1.782831  |
| H  | -0.329632 | -2.167732 | 1.74158   |
| H  | -3.380884 | -1.654251 | -1.161045 |
| H  | -3.001859 | -0.718291 | 1.037512  |
| Na | 2.430487  | 1.525205  | -0.367948 |

115. Reactant of 4th Gal-L2 C=O Migration

25

|    |           |           |           |
|----|-----------|-----------|-----------|
| C  | -2.900728 | -0.219157 | 0.066248  |
| C  | -1.774015 | 0.749454  | 0.24095   |
| C  | -0.446125 | 0.753367  | -0.305026 |
| O  | 0.316409  | 1.702627  | 0.121016  |
| C  | 0.173325  | -0.492264 | -0.958675 |
| C  | 0.567206  | -1.56192  | 0.099949  |
| C  | 2.02681   | -1.502477 | 0.530467  |
| O  | 2.363207  | -0.230852 | 1.068502  |
| O  | -0.278418 | -1.358114 | 1.224729  |
| O  | 1.339656  | -0.08195  | -1.671968 |
| O  | -2.041287 | 1.753938  | 1.023064  |
| O  | -2.603863 | -1.122756 | -0.967886 |
| H  | 0.382794  | -2.547905 | -0.340018 |
| H  | -3.81256  | 0.354741  | -0.126335 |
| H  | -1.33475  | 1.158091  | -1.148757 |
| H  | -0.545396 | -0.938801 | -1.639643 |
| H  | 2.20833   | -2.286291 | 1.273384  |
| H  | 2.686365  | -1.678075 | -0.317604 |
| H  | 1.186785  | -0.154544 | -2.617275 |
| H  | -1.182165 | 2.227691  | 1.13966   |
| H  | 1.743147  | -0.037049 | 1.782831  |
| H  | -0.329632 | -2.167732 | 1.74158   |
| H  | -3.380884 | -1.654251 | -1.161045 |
| H  | -3.001859 | -0.718291 | 1.037512  |
| Na | 2.430487  | 1.525205  | -0.367948 |

116. Transition States of 1st Gal-L3a C-C cleavage

25

|    |           |           |           |
|----|-----------|-----------|-----------|
| C  | 2.109404  | 1.008989  | -0.453952 |
| C  | 1.274177  | 1.014886  | 0.810544  |
| C  | -0.234317 | 1.185023  | 0.680062  |
| O  | -0.864968 | 0.995863  | 1.788806  |
| C  | -0.991543 | 1.442639  | -0.461715 |
| C  | -2.178667 | -0.229373 | -0.390511 |
| C  | -1.37837  | -1.341062 | -1.038933 |
| O  | -0.562843 | -1.966154 | -0.063625 |
| O  | -2.490296 | -0.407629 | 0.836211  |
| O  | -0.392927 | 1.487464  | -1.70948  |
| O  | 1.55626   | -0.19525  | 1.509518  |
| O  | 1.796201  | -0.112471 | -1.27495  |
| H  | -2.898046 | 0.260234  | -1.055682 |
| H  | 3.157865  | 0.918216  | -0.165472 |
| H  | -1.87692  | 2.052531  | -0.322145 |
| H  | -2.095427 | -2.059982 | -1.453977 |
| H  | -0.752439 | -0.976207 | -1.852473 |
| H  | -0.73649  | 2.221421  | -2.228277 |
| H  | -1.111073 | -2.028211 | 0.73428   |
| H  | -1.769008 | 0.389143  | 1.546071  |
| H  | 1.133315  | 0.180347  | -1.912542 |
| H  | 1.982197  | 1.943026  | -1.000591 |
| H  | 1.084287  | -0.173095 | 2.351695  |
| H  | 1.598223  | 1.870413  | 1.419527  |
| Na | 1.667999  | -1.954459 | 0.034069  |



117. Reactant of 1st Gal-L3a C-C cleavage

25

|    |           |           |           |
|----|-----------|-----------|-----------|
| C  | 2.109404  | 1.008989  | -0.453952 |
| C  | 1.274177  | 1.014886  | 0.810544  |
| C  | -0.234317 | 1.185023  | 0.680062  |
| O  | -0.864968 | 0.995863  | 1.788806  |
| C  | -0.991543 | 1.442639  | -0.461715 |
| C  | -2.178667 | -0.229373 | -0.390511 |
| C  | -1.37837  | -1.341062 | -1.038933 |
| O  | -0.562843 | -1.966154 | -0.063625 |
| O  | -2.490296 | -0.407629 | 0.836211  |
| O  | -0.392927 | 1.487464  | -1.70948  |
| O  | 1.55626   | -0.19525  | 1.509518  |
| O  | 1.796201  | -0.112471 | -1.27495  |
| H  | -2.898046 | 0.260234  | -1.055682 |
| H  | 3.157865  | 0.918216  | -0.165472 |
| H  | -1.87692  | 2.052531  | -0.322145 |
| H  | -2.095427 | -2.059982 | -1.453977 |
| H  | -0.752439 | -0.976207 | -1.852473 |
| H  | -0.73649  | 2.221421  | -2.228277 |
| H  | -1.111073 | -2.028211 | 0.73428   |
| H  | -1.769008 | 0.389143  | 1.546071  |
| H  | 1.133315  | 0.180347  | -1.912542 |
| H  | 1.982197  | 1.943026  | -1.000591 |
| H  | 1.084287  | -0.173095 | 2.351695  |
| H  | 1.598223  | 1.870413  | 1.419527  |
| Na | 1.667999  | -1.954459 | 0.034069  |

## 118. Transition States of 2nd Gal-L3a C-C cleavage

25

|    |           |           |           |
|----|-----------|-----------|-----------|
| C  | -2.111461 | 1.00522   | 0.458865  |
| C  | -1.276527 | 1.016759  | -0.805786 |
| C  | 0.231762  | 1.188516  | -0.675142 |
| O  | 0.861589  | 1.006617  | -1.785663 |
| C  | 0.989507  | 1.441483  | 0.467229  |
| C  | 2.181848  | -0.228184 | 0.385873  |
| C  | 1.385641  | -1.342147 | 1.03524   |
| O  | 0.56673   | -1.965932 | 0.062086  |
| O  | 2.48745   | -0.402559 | -0.84283  |
| O  | 0.391119  | 1.478804  | 1.715279  |
| O  | -1.556513 | -0.191569 | -1.508999 |
| O  | -1.798451 | -0.12052  | 1.273969  |
| H  | 2.904164  | 0.260555  | 1.048477  |
| H  | -3.160126 | 0.916615  | 0.170551  |
| H  | 1.872973  | 2.054642  | 0.329995  |
| H  | 2.105216  | -2.061132 | 1.445794  |
| H  | 0.762752  | -0.979568 | 1.852191  |
| H  | 0.740616  | 2.20459   | 2.241492  |
| H  | 1.109557  | -2.016761 | -0.740473 |
| H  | 1.765972  | 0.399261  | -1.547581 |
| H  | -1.133489 | 0.16834   | 1.910974  |
| H  | -1.983096 | 1.936361  | 1.010161  |
| H  | -1.090998 | -0.162444 | -2.354479 |
| H  | -1.601829 | 1.873755  | -1.411953 |
| Na | -1.664701 | -1.95662  | -0.042141 |

119. Reactant of 2nd Gal-L3a C-C cleavage

25

|    |           |           |           |
|----|-----------|-----------|-----------|
| C  | -2.111461 | 1.00522   | 0.458865  |
| C  | -1.276527 | 1.016759  | -0.805786 |
| C  | 0.231762  | 1.188516  | -0.675142 |
| O  | 0.861589  | 1.006617  | -1.785663 |
| C  | 0.989507  | 1.441483  | 0.467229  |
| C  | 2.181848  | -0.228184 | 0.385873  |
| C  | 1.385641  | -1.342147 | 1.03524   |
| O  | 0.56673   | -1.965932 | 0.062086  |
| O  | 2.48745   | -0.402559 | -0.84283  |
| O  | 0.391119  | 1.478804  | 1.715279  |
| O  | -1.556513 | -0.191569 | -1.508999 |
| O  | -1.798451 | -0.12052  | 1.273969  |
| H  | 2.904164  | 0.260555  | 1.048477  |
| H  | -3.160126 | 0.916615  | 0.170551  |
| H  | 1.872973  | 2.054642  | 0.329995  |
| H  | 2.105216  | -2.061132 | 1.445794  |
| H  | 0.762752  | -0.979568 | 1.852191  |
| H  | 0.740616  | 2.20459   | 2.241492  |
| H  | 1.109557  | -2.016761 | -0.740473 |
| H  | 1.765972  | 0.399261  | -1.547581 |
| H  | -1.133489 | 0.16834   | 1.910974  |
| H  | -1.983096 | 1.936361  | 1.010161  |
| H  | -1.090998 | -0.162444 | -2.354479 |
| H  | -1.601829 | 1.873755  | -1.411953 |
| Na | -1.664701 | -1.95662  | -0.042141 |

## 120. Transition States of 3rd Gal-L3a C-C cleavage

25

|    |           |           |           |
|----|-----------|-----------|-----------|
| C  | -1.001943 | -0.186083 | 1.63508   |
| C  | -1.242328 | 0.981194  | 0.685264  |
| C  | -0.287103 | 0.975792  | -0.500807 |
| O  | -0.592842 | 0.244243  | -1.529998 |
| C  | 0.933654  | 1.623639  | -0.461246 |
| C  | 2.117329  | -0.129609 | -0.740601 |
| C  | 2.406059  | -0.681394 | 0.642004  |
| O  | 1.579138  | -1.778775 | 0.966248  |
| O  | 1.477049  | -0.85442  | -1.57718  |
| O  | 1.30078   | 2.210137  | 0.722029  |
| O  | -2.572529 | 0.816344  | 0.188802  |
| O  | -1.112838 | -1.407492 | 0.916231  |
| H  | 2.89752   | 0.537275  | -1.121765 |
| H  | -1.765572 | -0.161449 | 2.414576  |
| H  | 1.359438  | 1.994582  | -1.385743 |
| H  | 3.462198  | -0.977212 | 0.659094  |
| H  | 2.275585  | 0.090058  | 1.403989  |
| H  | 1.768807  | 3.037523  | 0.574384  |
| H  | 1.851477  | -2.534051 | 0.433413  |
| H  | 0.389531  | -0.371821 | -1.755047 |
| H  | -0.214076 | -1.777795 | 0.880792  |
| H  | -0.01671  | -0.098498 | 2.099099  |
| H  | -2.950671 | 1.666886  | -0.0527   |
| H  | -1.134549 | 1.920511  | 1.232364  |
| Na | -2.373368 | -1.151594 | -0.948151 |

121. Reactant of 3rd Gal-L3a C-C cleavage

25

|    |           |           |           |
|----|-----------|-----------|-----------|
| C  | -1.001943 | -0.186083 | 1.63508   |
| C  | -1.242328 | 0.981194  | 0.685264  |
| C  | -0.287103 | 0.975792  | -0.500807 |
| O  | -0.592842 | 0.244243  | -1.529998 |
| C  | 0.933654  | 1.623639  | -0.461246 |
| C  | 2.117329  | -0.129609 | -0.740601 |
| C  | 2.406059  | -0.681394 | 0.642004  |
| O  | 1.579138  | -1.778775 | 0.966248  |
| O  | 1.477049  | -0.85442  | -1.57718  |
| O  | 1.30078   | 2.210137  | 0.722029  |
| O  | -2.572529 | 0.816344  | 0.188802  |
| O  | -1.112838 | -1.407492 | 0.916231  |
| H  | 2.89752   | 0.537275  | -1.121765 |
| H  | -1.765572 | -0.161449 | 2.414576  |
| H  | 1.359438  | 1.994582  | -1.385743 |
| H  | 3.462198  | -0.977212 | 0.659094  |
| H  | 2.275585  | 0.090058  | 1.403989  |
| H  | 1.768807  | 3.037523  | 0.574384  |
| H  | 1.851477  | -2.534051 | 0.433413  |
| H  | 0.389531  | -0.371821 | -1.755047 |
| H  | -0.214076 | -1.777795 | 0.880792  |
| H  | -0.01671  | -0.098498 | 2.099099  |
| H  | -2.950671 | 1.666886  | -0.0527   |
| H  | -1.134549 | 1.920511  | 1.232364  |
| Na | -2.373368 | -1.151594 | -0.948151 |

## 122. Transition States of 4th Gal-L3a C-C cleavage

25

|    |           |           |           |
|----|-----------|-----------|-----------|
| C  | -0.920179 | -0.143315 | 1.653475  |
| C  | -1.270867 | 0.988439  | 0.693878  |
| C  | -0.371395 | 0.976328  | -0.535998 |
| O  | -0.734721 | 0.241942  | -1.541476 |
| C  | 0.86789   | 1.588214  | -0.544979 |
| C  | 2.017628  | -0.247003 | -0.93632  |
| C  | 2.629787  | -0.594636 | 0.39177   |
| O  | 1.761456  | -1.425944 | 1.130569  |
| O  | 1.203724  | -1.049584 | -1.502365 |
| O  | 1.304141  | 2.174034  | 0.616157  |
| O  | -2.616905 | 0.751115  | 0.278524  |
| O  | -0.961537 | -1.383206 | 0.955044  |
| H  | 2.674975  | 0.361132  | -1.565977 |
| H  | -1.665416 | -0.165283 | 2.450666  |
| H  | 1.26962   | 1.940766  | -1.48721  |
| H  | 3.567039  | -1.115864 | 0.155278  |
| H  | 2.872736  | 0.324226  | 0.9361    |
| H  | 1.713029  | 3.027511  | 0.44263   |
| H  | 2.255075  | -1.90486  | 1.801987  |
| H  | 0.214087  | -0.46879  | -1.752434 |
| H  | -0.043618 | -1.684951 | 0.849184  |
| H  | 0.069173  | 0.026227  | 2.079392  |
| H  | -3.025812 | 1.568838  | -0.020129 |
| H  | -1.176666 | 1.945019  | 1.213219  |
| Na | -2.371881 | -1.24809  | -0.811391 |

123. Reactant of 4th Gal-L3a C-C cleavage

25

|    |           |           |           |
|----|-----------|-----------|-----------|
| C  | -0.920179 | -0.143315 | 1.653475  |
| C  | -1.270867 | 0.988439  | 0.693878  |
| C  | -0.371395 | 0.976328  | -0.535998 |
| O  | -0.734721 | 0.241942  | -1.541476 |
| C  | 0.86789   | 1.588214  | -0.544979 |
| C  | 2.017628  | -0.247003 | -0.93632  |
| C  | 2.629787  | -0.594636 | 0.39177   |
| O  | 1.761456  | -1.425944 | 1.130569  |
| O  | 1.203724  | -1.049584 | -1.502365 |
| O  | 1.304141  | 2.174034  | 0.616157  |
| O  | -2.616905 | 0.751115  | 0.278524  |
| O  | -0.961537 | -1.383206 | 0.955044  |
| H  | 2.674975  | 0.361132  | -1.565977 |
| H  | -1.665416 | -0.165283 | 2.450666  |
| H  | 1.26962   | 1.940766  | -1.48721  |
| H  | 3.567039  | -1.115864 | 0.155278  |
| H  | 2.872736  | 0.324226  | 0.9361    |
| H  | 1.713029  | 3.027511  | 0.44263   |
| H  | 2.255075  | -1.90486  | 1.801987  |
| H  | 0.214087  | -0.46879  | -1.752434 |
| H  | -0.043618 | -1.684951 | 0.849184  |
| H  | 0.069173  | 0.026227  | 2.079392  |
| H  | -3.025812 | 1.568838  | -0.020129 |
| H  | -1.176666 | 1.945019  | 1.213219  |
| Na | -2.371881 | -1.24809  | -0.811391 |

## 124. Transition States of 1st Gal-L3a C=O Migration

25

|    |           |           |           |
|----|-----------|-----------|-----------|
| C  | -2.873411 | -0.236748 | 0.822448  |
| C  | -2.364515 | -0.020612 | -0.605743 |
| C  | -1.160278 | 0.8803    | -0.526011 |
| O  | -1.411574 | 2.151719  | -0.484719 |
| C  | 0.236827  | 0.547448  | -0.454939 |
| C  | 0.704562  | -0.866279 | -0.068183 |
| C  | 1.867809  | -1.39337  | -0.888954 |
| O  | 3.028064  | -0.598303 | -0.649632 |
| O  | 1.129958  | -0.782155 | 1.287761  |
| O  | 1.011817  | 1.562943  | -0.255286 |
| O  | -1.988577 | -1.216714 | -1.241694 |
| O  | -1.81285  | -0.77191  | 1.60166   |
| H  | -0.11773  | -1.572878 | -0.171702 |
| H  | -3.719417 | -0.929352 | 0.780748  |
| H  | -0.217761 | 0.443713  | -1.645169 |
| H  | 2.055758  | -2.425351 | -0.581414 |
| H  | 1.596974  | -1.374289 | -1.948746 |
| H  | -0.529113 | 2.568742  | -0.291333 |
| H  | 3.76206   | -0.939153 | -1.16712  |
| H  | 0.326798  | -0.757514 | 1.824867  |
| H  | -2.178481 | -1.176187 | 2.393677  |
| H  | -3.217143 | 0.719769  | 1.228843  |
| H  | -2.771446 | -1.699059 | -1.52359  |
| H  | -3.134473 | 0.520281  | -1.167077 |
| Na | 2.729391  | 0.944747  | 0.957416  |



125. Reactant of 1st Gal-L3a C=O Migration

25

|    |           |           |           |
|----|-----------|-----------|-----------|
| C  | -2.873411 | -0.236748 | 0.822448  |
| C  | -2.364515 | -0.020612 | -0.605743 |
| C  | -1.160278 | 0.8803    | -0.526011 |
| O  | -1.411574 | 2.151719  | -0.484719 |
| C  | 0.236827  | 0.547448  | -0.454939 |
| C  | 0.704562  | -0.866279 | -0.068183 |
| C  | 1.867809  | -1.39337  | -0.888954 |
| O  | 3.028064  | -0.598303 | -0.649632 |
| O  | 1.129958  | -0.782155 | 1.287761  |
| O  | 1.011817  | 1.562943  | -0.255286 |
| O  | -1.988577 | -1.216714 | -1.241694 |
| O  | -1.81285  | -0.77191  | 1.60166   |
| H  | -0.11773  | -1.572878 | -0.171702 |
| H  | -3.719417 | -0.929352 | 0.780748  |
| H  | -0.217761 | 0.443713  | -1.645169 |
| H  | 2.055758  | -2.425351 | -0.581414 |
| H  | 1.596974  | -1.374289 | -1.948746 |
| H  | -0.529113 | 2.568742  | -0.291333 |
| H  | 3.76206   | -0.939153 | -1.16712  |
| H  | 0.326798  | -0.757514 | 1.824867  |
| H  | -2.178481 | -1.176187 | 2.393677  |
| H  | -3.217143 | 0.719769  | 1.228843  |
| H  | -2.771446 | -1.699059 | -1.52359  |
| H  | -3.134473 | 0.520281  | -1.167077 |
| Na | 2.729391  | 0.944747  | 0.957416  |

## 126. Transition States of 2nd Gal-L3a C=O Migration

25

|    |           |           |           |
|----|-----------|-----------|-----------|
| C  | -2.764868 | -0.265595 | 0.920719  |
| C  | -2.387907 | 0.112278  | -0.521779 |
| C  | -1.150254 | 0.973203  | -0.440861 |
| O  | -1.36348  | 2.2409    | -0.271975 |
| C  | 0.244998  | 0.609392  | -0.443868 |
| C  | 0.696643  | -0.840746 | -0.220328 |
| C  | 1.898033  | -1.261203 | -1.051923 |
| O  | 3.056338  | -0.543523 | -0.633934 |
| O  | 1.057045  | -0.938032 | 1.151697  |
| O  | 1.044334  | 1.584128  | -0.160241 |
| O  | -2.16208  | -1.073959 | -1.246889 |
| O  | -1.792463 | -1.137431 | 1.46853   |
| H  | -0.116893 | -1.523516 | -0.465641 |
| H  | -3.751645 | -0.733311 | 0.909602  |
| H  | -0.241656 | 0.632688  | -1.62763  |
| H  | 2.052103  | -2.332426 | -0.898273 |
| H  | 1.687792  | -1.073009 | -2.109153 |
| H  | -0.463217 | 2.617369  | -0.072252 |
| H  | 3.817986  | -0.844528 | -1.135999 |
| H  | 0.231498  | -1.005171 | 1.655618  |
| H  | -2.00743  | -2.03875  | 1.207878  |
| H  | -2.806598 | 0.626352  | 1.547511  |
| H  | -2.648245 | -1.059679 | -2.075805 |
| H  | -3.186214 | 0.724491  | -0.951266 |
| Na | 2.681373  | 0.817168  | 1.100559  |

127. Reactant of 2nd Gal-L3a C=O Migration

25

|    |           |           |           |
|----|-----------|-----------|-----------|
| C  | -2.764868 | -0.265595 | 0.920719  |
| C  | -2.387907 | 0.112278  | -0.521779 |
| C  | -1.150254 | 0.973203  | -0.440861 |
| O  | -1.36348  | 2.2409    | -0.271975 |
| C  | 0.244998  | 0.609392  | -0.443868 |
| C  | 0.696643  | -0.840746 | -0.220328 |
| C  | 1.898033  | -1.261203 | -1.051923 |
| O  | 3.056338  | -0.543523 | -0.633934 |
| O  | 1.057045  | -0.938032 | 1.151697  |
| O  | 1.044334  | 1.584128  | -0.160241 |
| O  | -2.16208  | -1.073959 | -1.246889 |
| O  | -1.792463 | -1.137431 | 1.46853   |
| H  | -0.116893 | -1.523516 | -0.465641 |
| H  | -3.751645 | -0.733311 | 0.909602  |
| H  | -0.241656 | 0.632688  | -1.62763  |
| H  | 2.052103  | -2.332426 | -0.898273 |
| H  | 1.687792  | -1.073009 | -2.109153 |
| H  | -0.463217 | 2.617369  | -0.072252 |
| H  | 3.817986  | -0.844528 | -1.135999 |
| H  | 0.231498  | -1.005171 | 1.655618  |
| H  | -2.00743  | -2.03875  | 1.207878  |
| H  | -2.806598 | 0.626352  | 1.547511  |
| H  | -2.648245 | -1.059679 | -2.075805 |
| H  | -3.186214 | 0.724491  | -0.951266 |
| Na | 2.681373  | 0.817168  | 1.100559  |

## 128. Transition States of 3rd Gal-L3a C=O Migration

25

|    |           |           |           |
|----|-----------|-----------|-----------|
| C  | -3.094543 | 0.245406  | 0.603995  |
| C  | -2.096844 | 0.029313  | -0.537313 |
| C  | -0.90443  | 0.917456  | -0.35639  |
| O  | -1.09172  | 2.178911  | -0.589639 |
| C  | 0.461467  | 0.560701  | -0.054494 |
| C  | 0.890264  | -0.787937 | 0.60815   |
| C  | 1.519382  | -1.734317 | -0.394623 |
| O  | 2.605511  | -1.028092 | -1.006031 |
| O  | 1.904293  | -0.500543 | 1.561331  |
| O  | 1.267814  | 1.569453  | 0.030437  |
| O  | -1.649486 | -1.301745 | -0.57168  |
| O  | -4.079825 | -0.73451  | 0.367954  |
| H  | 0.040133  | -1.282716 | 1.074449  |
| H  | -3.493811 | 1.262431  | 0.5564    |
| H  | 0.165467  | 0.259101  | -1.243145 |
| H  | 1.889483  | -2.617004 | 0.132014  |
| H  | 0.772892  | -2.024286 | -1.13679  |
| H  | -0.229406 | 2.611642  | -0.358299 |
| H  | 2.972796  | -1.554972 | -1.720907 |
| H  | 1.517219  | -0.083297 | 2.337239  |
| H  | -4.784281 | -0.676504 | 1.018524  |
| H  | -2.596988 | 0.087939  | 1.569287  |
| H  | -2.434039 | -1.863699 | -0.512208 |
| H  | -2.59034  | 0.307519  | -1.476833 |
| Na | 3.315128  | 0.792938  | 0.200486  |

129. Reactant of 3rd Gal-L3a C=O Migration

25

|    |           |           |           |
|----|-----------|-----------|-----------|
| C  | -3.094543 | 0.245406  | 0.603995  |
| C  | -2.096844 | 0.029313  | -0.537313 |
| C  | -0.90443  | 0.917456  | -0.35639  |
| O  | -1.09172  | 2.178911  | -0.589639 |
| C  | 0.461467  | 0.560701  | -0.054494 |
| C  | 0.890264  | -0.787937 | 0.60815   |
| C  | 1.519382  | -1.734317 | -0.394623 |
| O  | 2.605511  | -1.028092 | -1.006031 |
| O  | 1.904293  | -0.500543 | 1.561331  |
| O  | 1.267814  | 1.569453  | 0.030437  |
| O  | -1.649486 | -1.301745 | -0.57168  |
| O  | -4.079825 | -0.73451  | 0.367954  |
| H  | 0.040133  | -1.282716 | 1.074449  |
| H  | -3.493811 | 1.262431  | 0.5564    |
| H  | 0.165467  | 0.259101  | -1.243145 |
| H  | 1.889483  | -2.617004 | 0.132014  |
| H  | 0.772892  | -2.024286 | -1.13679  |
| H  | -0.229406 | 2.611642  | -0.358299 |
| H  | 2.972796  | -1.554972 | -1.720907 |
| H  | 1.517219  | -0.083297 | 2.337239  |
| H  | -4.784281 | -0.676504 | 1.018524  |
| H  | -2.596988 | 0.087939  | 1.569287  |
| H  | -2.434039 | -1.863699 | -0.512208 |
| H  | -2.59034  | 0.307519  | -1.476833 |
| Na | 3.315128  | 0.792938  | 0.200486  |

### 130. Transition States of 4th Gal-L3a C=O Migration

25

|    |           |           |           |
|----|-----------|-----------|-----------|
| C  | -3.053195 | 0.214218  | 0.678118  |
| C  | -2.131765 | 0.052911  | -0.533634 |
| C  | -0.917364 | 0.91773   | -0.379218 |
| O  | -1.09113  | 2.184734  | -0.588102 |
| C  | 0.455292  | 0.539679  | -0.134248 |
| C  | 0.864948  | -0.820759 | 0.485686  |
| C  | 1.607693  | -1.702159 | -0.505979 |
| O  | 2.763713  | -0.976893 | -0.928327 |
| O  | 1.739008  | -0.473967 | 1.560154  |
| O  | 1.277437  | 1.533031  | -0.074047 |
| O  | -1.710987 | -1.280702 | -0.674565 |
| O  | -4.073421 | -0.730288 | 0.443896  |
| H  | -0.012152 | -1.352806 | 0.848386  |
| H  | -3.432018 | 1.239449  | 0.718482  |
| H  | 0.100218  | 0.257525  | -1.31626  |
| H  | 1.904972  | -2.634393 | -0.015119 |
| H  | 0.952278  | -1.933979 | -1.349961 |
| H  | -0.214127 | 2.599164  | -0.376746 |
| H  | 3.192589  | -1.440096 | -1.652822 |
| H  | 1.710132  | -1.159327 | 2.233398  |
| H  | -4.741663 | -0.690579 | 1.132845  |
| H  | -2.501014 | -0.012386 | 1.598778  |
| H  | -2.503244 | -1.831977 | -0.620537 |
| H  | -2.675989 | 0.392659  | -1.423324 |
| Na | 3.2754    | 0.846337  | 0.422406  |

131. Reactant of 4th Gal-L3a C=O Migration

25

|    |           |           |           |
|----|-----------|-----------|-----------|
| C  | -3.053195 | 0.214218  | 0.678118  |
| C  | -2.131765 | 0.052911  | -0.533634 |
| C  | -0.917364 | 0.91773   | -0.379218 |
| O  | -1.09113  | 2.184734  | -0.588102 |
| C  | 0.455292  | 0.539679  | -0.134248 |
| C  | 0.864948  | -0.820759 | 0.485686  |
| C  | 1.607693  | -1.702159 | -0.505979 |
| O  | 2.763713  | -0.976893 | -0.928327 |
| O  | 1.739008  | -0.473967 | 1.560154  |
| O  | 1.277437  | 1.533031  | -0.074047 |
| O  | -1.710987 | -1.280702 | -0.674565 |
| O  | -4.073421 | -0.730288 | 0.443896  |
| H  | -0.012152 | -1.352806 | 0.848386  |
| H  | -3.432018 | 1.239449  | 0.718482  |
| H  | 0.100218  | 0.257525  | -1.31626  |
| H  | 1.904972  | -2.634393 | -0.015119 |
| H  | 0.952278  | -1.933979 | -1.349961 |
| H  | -0.214127 | 2.599164  | -0.376746 |
| H  | 3.192589  | -1.440096 | -1.652822 |
| H  | 1.710132  | -1.159327 | 2.233398  |
| H  | -4.741663 | -0.690579 | 1.132845  |
| H  | -2.501014 | -0.012386 | 1.598778  |
| H  | -2.503244 | -1.831977 | -0.620537 |
| H  | -2.675989 | 0.392659  | -1.423324 |
| Na | 3.2754    | 0.846337  | 0.422406  |

### 132. Transition States of 1st Gal-L3b C-C cleavage

25

|    |           |           |           |
|----|-----------|-----------|-----------|
| C  | -2.123342 | 1.204172  | 0.679227  |
| C  | -0.821781 | 0.433291  | 0.84055   |
| C  | -0.077425 | 0.398968  | -0.489648 |
| O  | -0.229029 | -0.641749 | -1.262238 |
| C  | 0.823537  | 1.38189   | -0.830463 |
| C  | 2.377225  | -0.055679 | -0.517012 |
| C  | 2.450373  | -0.237895 | 0.983545  |
| O  | 1.580748  | -1.265951 | 1.411643  |
| O  | 2.078606  | -1.062029 | -1.243694 |
| O  | 1.010462  | 2.412992  | 0.045519  |
| O  | -1.152501 | -0.877072 | 1.258531  |
| O  | -2.904437 | 0.503314  | -0.294634 |
| H  | 3.055473  | 0.69869   | -0.930319 |
| H  | -1.906684 | 2.221447  | 0.344564  |
| H  | 1.11938   | 1.510228  | -1.865475 |
| H  | 3.491019  | -0.475378 | 1.238769  |
| H  | 2.183662  | 0.682189  | 1.50701   |
| H  | 1.497816  | 3.133201  | -0.364146 |
| H  | 1.868204  | -2.087513 | 0.995573  |
| H  | 0.874923  | -1.04782  | -1.390239 |
| H  | -3.694508 | 1.008476  | -0.504639 |
| H  | -2.644253 | 1.226393  | 1.638917  |
| H  | -0.320579 | -1.273968 | 1.564293  |
| H  | -0.215547 | 0.949749  | 1.590171  |
| Na | -2.195566 | -1.622746 | -0.649336 |



133. Reactant of 1st Gal-L3b C-C cleavage

25

|    |           |           |           |
|----|-----------|-----------|-----------|
| C  | -2.123342 | 1.204172  | 0.679227  |
| C  | -0.821781 | 0.433291  | 0.84055   |
| C  | -0.077425 | 0.398968  | -0.489648 |
| O  | -0.229029 | -0.641749 | -1.262238 |
| C  | 0.823537  | 1.38189   | -0.830463 |
| C  | 2.377225  | -0.055679 | -0.517012 |
| C  | 2.450373  | -0.237895 | 0.983545  |
| O  | 1.580748  | -1.265951 | 1.411643  |
| O  | 2.078606  | -1.062029 | -1.243694 |
| O  | 1.010462  | 2.412992  | 0.045519  |
| O  | -1.152501 | -0.877072 | 1.258531  |
| O  | -2.904437 | 0.503314  | -0.294634 |
| H  | 3.055473  | 0.69869   | -0.930319 |
| H  | -1.906684 | 2.221447  | 0.344564  |
| H  | 1.11938   | 1.510228  | -1.865475 |
| H  | 3.491019  | -0.475378 | 1.238769  |
| H  | 2.183662  | 0.682189  | 1.50701   |
| H  | 1.497816  | 3.133201  | -0.364146 |
| H  | 1.868204  | -2.087513 | 0.995573  |
| H  | 0.874923  | -1.04782  | -1.390239 |
| H  | -3.694508 | 1.008476  | -0.504639 |
| H  | -2.644253 | 1.226393  | 1.638917  |
| H  | -0.320579 | -1.273968 | 1.564293  |
| H  | -0.215547 | 0.949749  | 1.590171  |
| Na | -2.195566 | -1.622746 | -0.649336 |

### 134. Transition States of 2nd Gal-L3b C-C cleavage

25

|    |           |           |           |
|----|-----------|-----------|-----------|
| C  | -2.449621 | 0.62752   | -0.300572 |
| C  | -1.16138  | 1.416968  | -0.121294 |
| C  | -0.01572  | 0.84093   | -0.946398 |
| O  | -0.278251 | -0.092286 | -1.805418 |
| C  | 1.312566  | 1.198125  | -0.745122 |
| C  | 1.95443   | -0.666324 | -0.170285 |
| C  | 1.656716  | -0.721421 | 1.313352  |
| O  | 0.302787  | -1.055631 | 1.540542  |
| O  | 1.361468  | -1.51575  | -0.939407 |
| O  | 1.585604  | 2.123166  | 0.240074  |
| O  | -0.859535 | 1.439318  | 1.266193  |
| O  | -2.332077 | -0.672573 | 0.282872  |
| H  | 2.988637  | -0.399892 | -0.414667 |
| H  | -2.670565 | 0.503039  | -1.35959  |
| H  | 1.975359  | 1.165509  | -1.602719 |
| H  | 2.281022  | -1.516807 | 1.734243  |
| H  | 1.933816  | 0.217056  | 1.798958  |
| H  | 2.311666  | 2.699297  | -0.017248 |
| H  | -0.194215 | -0.233164 | 1.688557  |
| H  | 0.540089  | -0.814009 | -1.706957 |
| H  | -2.738341 | -0.655153 | 1.154337  |
| H  | -3.265156 | 1.176714  | 0.17097   |
| H  | -0.20462  | 2.127975  | 1.437251  |
| H  | -1.332532 | 2.438023  | -0.487643 |
| Na | -0.695189 | -2.244848 | -0.113857 |

135. Reactant of 2nd Gal-L3b C-C cleavage

25

|    |           |           |           |
|----|-----------|-----------|-----------|
| C  | -2.449621 | 0.62752   | -0.300572 |
| C  | -1.16138  | 1.416968  | -0.121294 |
| C  | -0.01572  | 0.84093   | -0.946398 |
| O  | -0.278251 | -0.092286 | -1.805418 |
| C  | 1.312566  | 1.198125  | -0.745122 |
| C  | 1.95443   | -0.666324 | -0.170285 |
| C  | 1.656716  | -0.721421 | 1.313352  |
| O  | 0.302787  | -1.055631 | 1.540542  |
| O  | 1.361468  | -1.51575  | -0.939407 |
| O  | 1.585604  | 2.123166  | 0.240074  |
| O  | -0.859535 | 1.439318  | 1.266193  |
| O  | -2.332077 | -0.672573 | 0.282872  |
| H  | 2.988637  | -0.399892 | -0.414667 |
| H  | -2.670565 | 0.503039  | -1.35959  |
| H  | 1.975359  | 1.165509  | -1.602719 |
| H  | 2.281022  | -1.516807 | 1.734243  |
| H  | 1.933816  | 0.217056  | 1.798958  |
| H  | 2.311666  | 2.699297  | -0.017248 |
| H  | -0.194215 | -0.233164 | 1.688557  |
| H  | 0.540089  | -0.814009 | -1.706957 |
| H  | -2.738341 | -0.655153 | 1.154337  |
| H  | -3.265156 | 1.176714  | 0.17097   |
| H  | -0.20462  | 2.127975  | 1.437251  |
| H  | -1.332532 | 2.438023  | -0.487643 |
| Na | -0.695189 | -2.244848 | -0.113857 |

### 136. Transition States of 3rd Gal-L3b C-C cleavage

25

|    |           |           |           |
|----|-----------|-----------|-----------|
| C  | -2.477016 | 0.532173  | -0.285319 |
| C  | -1.215534 | 1.369286  | -0.138806 |
| C  | -0.041303 | 0.833386  | -0.942435 |
| O  | -0.279354 | -0.108316 | -1.800341 |
| C  | 1.273321  | 1.253532  | -0.758669 |
| C  | 1.965735  | -0.578838 | -0.174305 |
| C  | 1.690845  | -0.643936 | 1.312233  |
| O  | 0.353998  | -1.040458 | 1.558795  |
| O  | 1.404342  | -1.468637 | -0.930467 |
| O  | 1.662735  | 2.204324  | 0.127948  |
| O  | -0.794235 | 1.498115  | 1.221241  |
| O  | -2.283698 | -0.763562 | 0.285536  |
| H  | 2.983225  | -0.267285 | -0.428596 |
| H  | -2.726332 | 0.446634  | -1.345128 |
| H  | 1.915613  | 1.208036  | -1.630678 |
| H  | 2.352684  | -1.410374 | 1.729058  |
| H  | 1.937391  | 0.303388  | 1.796748  |
| H  | 1.00985   | 2.284737  | 0.834657  |
| H  | -0.180431 | -0.258291 | 1.755925  |
| H  | 0.568412  | -0.820138 | -1.6789   |
| H  | -3.101851 | -1.040741 | 0.707006  |
| H  | -3.294867 | 1.045198  | 0.227457  |
| H  | -1.407906 | 2.058767  | 1.710456  |
| H  | -1.433387 | 2.365374  | -0.549985 |
| Na | -0.573545 | -2.28006  | -0.082355 |

137. Reactant of 3rd Gal-L3b C-C cleavage

25

|    |           |           |           |
|----|-----------|-----------|-----------|
| C  | -2.477016 | 0.532173  | -0.285319 |
| C  | -1.215534 | 1.369286  | -0.138806 |
| C  | -0.041303 | 0.833386  | -0.942435 |
| O  | -0.279354 | -0.108316 | -1.800341 |
| C  | 1.273321  | 1.253532  | -0.758669 |
| C  | 1.965735  | -0.578838 | -0.174305 |
| C  | 1.690845  | -0.643936 | 1.312233  |
| O  | 0.353998  | -1.040458 | 1.558795  |
| O  | 1.404342  | -1.468637 | -0.930467 |
| O  | 1.662735  | 2.204324  | 0.127948  |
| O  | -0.794235 | 1.498115  | 1.221241  |
| O  | -2.283698 | -0.763562 | 0.285536  |
| H  | 2.983225  | -0.267285 | -0.428596 |
| H  | -2.726332 | 0.446634  | -1.345128 |
| H  | 1.915613  | 1.208036  | -1.630678 |
| H  | 2.352684  | -1.410374 | 1.729058  |
| H  | 1.937391  | 0.303388  | 1.796748  |
| H  | 1.00985   | 2.284737  | 0.834657  |
| H  | -0.180431 | -0.258291 | 1.755925  |
| H  | 0.568412  | -0.820138 | -1.6789   |
| H  | -3.101851 | -1.040741 | 0.707006  |
| H  | -3.294867 | 1.045198  | 0.227457  |
| H  | -1.407906 | 2.058767  | 1.710456  |
| H  | -1.433387 | 2.365374  | -0.549985 |
| Na | -0.573545 | -2.28006  | -0.082355 |

138. Transition States of 4th Gal-L3b C-C cleavage

25

|    |           |           |           |
|----|-----------|-----------|-----------|
| C  | 2.720293  | 0.245193  | -0.199563 |
| C  | 1.433613  | 0.91607   | -0.641662 |
| C  | 0.492742  | 1.183985  | 0.53341   |
| O  | 0.806229  | 0.726878  | 1.693376  |
| C  | -0.794379 | 1.664764  | 0.316716  |
| C  | -1.794148 | -0.087846 | 1.035841  |
| C  | -2.564355 | -0.522156 | -0.182949 |
| O  | -1.738082 | -1.315483 | -1.018669 |
| O  | -0.898838 | -0.860681 | 1.533141  |
| O  | -1.158453 | 1.93836   | -0.988709 |
| O  | 0.79674   | 0.018047  | -1.546931 |
| O  | 2.40611   | -1.087576 | 0.21541   |
| H  | -2.399842 | 0.49612   | 1.736113  |
| H  | 3.162988  | 0.810975  | 0.622066  |
| H  | -1.27886  | 2.230236  | 1.104177  |
| H  | -3.410832 | -1.110836 | 0.19403   |
| H  | -2.950081 | 0.348626  | -0.717704 |
| H  | -1.504943 | 2.832137  | -1.076826 |
| H  | -2.252434 | -1.624811 | -1.770008 |
| H  | 0.037313  | -0.076598 | 1.903394  |
| H  | 3.076821  | -1.393471 | 0.831244  |
| H  | 3.411824  | 0.212195  | -1.043996 |
| H  | 0.035896  | 0.465033  | -1.940296 |
| H  | 1.671229  | 1.861205  | -1.141515 |
| Na | 0.338971  | -1.891566 | -0.270216 |

139. Reactant of 4th Gal-L3b C-C cleavage

25

|    |           |           |           |
|----|-----------|-----------|-----------|
| C  | 2.720293  | 0.245193  | -0.199563 |
| C  | 1.433613  | 0.91607   | -0.641662 |
| C  | 0.492742  | 1.183985  | 0.53341   |
| O  | 0.806229  | 0.726878  | 1.693376  |
| C  | -0.794379 | 1.664764  | 0.316716  |
| C  | -1.794148 | -0.087846 | 1.035841  |
| C  | -2.564355 | -0.522156 | -0.182949 |
| O  | -1.738082 | -1.315483 | -1.018669 |
| O  | -0.898838 | -0.860681 | 1.533141  |
| O  | -1.158453 | 1.93836   | -0.988709 |
| O  | 0.79674   | 0.018047  | -1.546931 |
| O  | 2.40611   | -1.087576 | 0.21541   |
| H  | -2.399842 | 0.49612   | 1.736113  |
| H  | 3.162988  | 0.810975  | 0.622066  |
| H  | -1.27886  | 2.230236  | 1.104177  |
| H  | -3.410832 | -1.110836 | 0.19403   |
| H  | -2.950081 | 0.348626  | -0.717704 |
| H  | -1.504943 | 2.832137  | -1.076826 |
| H  | -2.252434 | -1.624811 | -1.770008 |
| H  | 0.037313  | -0.076598 | 1.903394  |
| H  | 3.076821  | -1.393471 | 0.831244  |
| H  | 3.411824  | 0.212195  | -1.043996 |
| H  | 0.035896  | 0.465033  | -1.940296 |
| H  | 1.671229  | 1.861205  | -1.141515 |
| Na | 0.338971  | -1.891566 | -0.270216 |

## 140. Transition States of 1st Gal-L3b C=O Migration

25

|    |           |           |           |
|----|-----------|-----------|-----------|
| C  | -3.372814 | 0.027371  | -0.128127 |
| C  | -2.159724 | -0.088894 | 0.788041  |
| C  | -1.051386 | 0.830169  | 0.330244  |
| O  | -1.39117  | 2.035838  | -0.007189 |
| C  | 0.348509  | 0.537756  | 0.142028  |
| C  | 1.083916  | -0.668538 | 0.803508  |
| C  | 1.471275  | -1.730394 | -0.207055 |
| O  | 2.277451  | -1.096039 | -1.2034   |
| O  | 2.307018  | -0.186589 | 1.346135  |
| O  | 1.054927  | 1.550923  | -0.243985 |
| O  | -1.699383 | -1.41411  | 0.851977  |
| O  | -2.946929 | -0.559104 | -1.346313 |
| H  | 0.466352  | -1.13023  | 1.571542  |
| H  | -3.65799  | 1.074237  | -0.251147 |
| H  | -0.365988 | 0.041492  | -0.782566 |
| H  | 2.039791  | -2.512672 | 0.30146   |
| H  | 0.570047  | -2.158328 | -0.652878 |
| H  | -0.531513 | 2.497551  | -0.191604 |
| H  | 2.491719  | -1.726456 | -1.896367 |
| H  | 2.142641  | 0.268911  | 2.177393  |
| H  | -3.661352 | -0.562603 | -1.988767 |
| H  | -4.199099 | -0.533965 | 0.317415  |
| H  | -2.007267 | -1.86262  | 0.052643  |
| H  | -2.433891 | 0.23989   | 1.796934  |
| Na | 3.128416  | 0.933875  | -0.545791 |



141. Reactant of 1st Gal-L3b C=O Migration

25

|    |           |           |           |
|----|-----------|-----------|-----------|
| C  | -3.372814 | 0.027371  | -0.128127 |
| C  | -2.159724 | -0.088894 | 0.788041  |
| C  | -1.051386 | 0.830169  | 0.330244  |
| O  | -1.39117  | 2.035838  | -0.007189 |
| C  | 0.348509  | 0.537756  | 0.142028  |
| C  | 1.083916  | -0.668538 | 0.803508  |
| C  | 1.471275  | -1.730394 | -0.207055 |
| O  | 2.277451  | -1.096039 | -1.2034   |
| O  | 2.307018  | -0.186589 | 1.346135  |
| O  | 1.054927  | 1.550923  | -0.243985 |
| O  | -1.699383 | -1.41411  | 0.851977  |
| O  | -2.946929 | -0.559104 | -1.346313 |
| H  | 0.466352  | -1.13023  | 1.571542  |
| H  | -3.65799  | 1.074237  | -0.251147 |
| H  | -0.365988 | 0.041492  | -0.782566 |
| H  | 2.039791  | -2.512672 | 0.30146   |
| H  | 0.570047  | -2.158328 | -0.652878 |
| H  | -0.531513 | 2.497551  | -0.191604 |
| H  | 2.491719  | -1.726456 | -1.896367 |
| H  | 2.142641  | 0.268911  | 2.177393  |
| H  | -3.661352 | -0.562603 | -1.988767 |
| H  | -4.199099 | -0.533965 | 0.317415  |
| H  | -2.007267 | -1.86262  | 0.052643  |
| H  | -2.433891 | 0.23989   | 1.796934  |
| Na | 3.128416  | 0.933875  | -0.545791 |

## 142. Transition States of 2nd Gal-L3b C=O Migration

25

|    |           |           |           |
|----|-----------|-----------|-----------|
| C  | -3.25722  | 0.286395  | -0.47858  |
| C  | -2.079679 | -0.001093 | 0.451116  |
| C  | -0.913343 | 0.896512  | 0.176703  |
| O  | -1.177827 | 2.135751  | -0.100661 |
| C  | 0.484522  | 0.550307  | 0.09314   |
| C  | 1.09415   | -0.737433 | 0.730209  |
| C  | 1.494997  | -1.757339 | -0.316653 |
| O  | 2.405332  | -1.106799 | -1.210066 |
| O  | 2.294039  | -0.364737 | 1.395115  |
| O  | 1.266564  | 1.550766  | -0.150791 |
| O  | -1.646735 | -1.331869 | 0.315496  |
| O  | -4.183003 | -0.730289 | -0.160574 |
| H  | 0.389915  | -1.202951 | 1.417994  |
| H  | -2.924047 | 0.215072  | -1.521254 |
| H  | -0.149683 | 0.14559   | -0.92561  |
| H  | 1.985004  | -2.599391 | 0.177784  |
| H  | 0.603587  | -2.100444 | -0.846038 |
| H  | -0.290032 | 2.574766  | -0.167576 |
| H  | 2.628151  | -1.699907 | -1.932596 |
| H  | 2.089079  | 0.061834  | 2.232791  |
| H  | -4.974125 | -0.653357 | -0.699896 |
| H  | -3.652171 | 1.287041  | -0.287574 |
| H  | -2.443344 | -1.880327 | 0.28542   |
| H  | -2.397794 | 0.202878  | 1.485049  |
| Na | 3.320722  | 0.81841   | -0.351114 |

143. Reactant of 2nd Gal-L3b C=O Migration

25

|    |           |           |           |
|----|-----------|-----------|-----------|
| C  | -3.25722  | 0.286395  | -0.47858  |
| C  | -2.079679 | -0.001093 | 0.451116  |
| C  | -0.913343 | 0.896512  | 0.176703  |
| O  | -1.177827 | 2.135751  | -0.100661 |
| C  | 0.484522  | 0.550307  | 0.09314   |
| C  | 1.09415   | -0.737433 | 0.730209  |
| C  | 1.494997  | -1.757339 | -0.316653 |
| O  | 2.405332  | -1.106799 | -1.210066 |
| O  | 2.294039  | -0.364737 | 1.395115  |
| O  | 1.266564  | 1.550766  | -0.150791 |
| O  | -1.646735 | -1.331869 | 0.315496  |
| O  | -4.183003 | -0.730289 | -0.160574 |
| H  | 0.389915  | -1.202951 | 1.417994  |
| H  | -2.924047 | 0.215072  | -1.521254 |
| H  | -0.149683 | 0.14559   | -0.92561  |
| H  | 1.985004  | -2.599391 | 0.177784  |
| H  | 0.603587  | -2.100444 | -0.846038 |
| H  | -0.290032 | 2.574766  | -0.167576 |
| H  | 2.628151  | -1.699907 | -1.932596 |
| H  | 2.089079  | 0.061834  | 2.232791  |
| H  | -4.974125 | -0.653357 | -0.699896 |
| H  | -3.652171 | 1.287041  | -0.287574 |
| H  | -2.443344 | -1.880327 | 0.28542   |
| H  | -2.397794 | 0.202878  | 1.485049  |
| Na | 3.320722  | 0.81841   | -0.351114 |

#### 144. Transition States of 3rd Gal-L3b C=O Migration

25

|    |           |           |           |
|----|-----------|-----------|-----------|
| C  | 3.419816  | 0.067445  | 0.064445  |
| C  | 2.173226  | -0.119024 | -0.793352 |
| C  | 1.057133  | 0.783861  | -0.315736 |
| O  | 1.385314  | 2.002374  | -0.014055 |
| C  | -0.33277  | 0.479126  | -0.071465 |
| C  | -1.056856 | -0.747448 | -0.672795 |
| C  | -1.58992  | -1.697571 | 0.389903  |
| O  | -2.523334 | -0.975653 | 1.19173   |
| O  | -2.157054 | -0.191624 | -1.395645 |
| O  | -1.036139 | 1.487368  | 0.32238   |
| O  | 1.7632    | -1.462095 | -0.794819 |
| O  | 3.063453  | -0.487031 | 1.319503  |
| H  | -0.388013 | -1.297117 | -1.33156  |
| H  | 3.678257  | 1.125525  | 0.13922   |
| H  | 0.436096  | 0.011634  | 0.8348    |
| H  | -2.086098 | -2.541632 | -0.099389 |
| H  | -0.761298 | -2.074732 | 0.996885  |
| H  | 0.522572  | 2.452206  | 0.186662  |
| H  | -2.805955 | -1.51997  | 1.931403  |
| H  | -2.339418 | -0.722683 | -2.175211 |
| H  | 3.802383  | -0.444168 | 1.931994  |
| H  | 4.242769  | -0.485923 | -0.396869 |
| H  | 2.09344   | -1.862505 | 0.021285  |
| H  | 2.390864  | 0.18333   | -1.823736 |
| Na | -3.161172 | 1.053728  | 0.285978  |

145. Reactant of 3rd Gal-L3b C=O Migration

25

|    |           |           |           |
|----|-----------|-----------|-----------|
| C  | 3.419816  | 0.067445  | 0.064445  |
| C  | 2.173226  | -0.119024 | -0.793352 |
| C  | 1.057133  | 0.783861  | -0.315736 |
| O  | 1.385314  | 2.002374  | -0.014055 |
| C  | -0.33277  | 0.479126  | -0.071465 |
| C  | -1.056856 | -0.747448 | -0.672795 |
| C  | -1.58992  | -1.697571 | 0.389903  |
| O  | -2.523334 | -0.975653 | 1.19173   |
| O  | -2.157054 | -0.191624 | -1.395645 |
| O  | -1.036139 | 1.487368  | 0.32238   |
| O  | 1.7632    | -1.462095 | -0.794819 |
| O  | 3.063453  | -0.487031 | 1.319503  |
| H  | -0.388013 | -1.297117 | -1.33156  |
| H  | 3.678257  | 1.125525  | 0.13922   |
| H  | 0.436096  | 0.011634  | 0.8348    |
| H  | -2.086098 | -2.541632 | -0.099389 |
| H  | -0.761298 | -2.074732 | 0.996885  |
| H  | 0.522572  | 2.452206  | 0.186662  |
| H  | -2.805955 | -1.51997  | 1.931403  |
| H  | -2.339418 | -0.722683 | -2.175211 |
| H  | 3.802383  | -0.444168 | 1.931994  |
| H  | 4.242769  | -0.485923 | -0.396869 |
| H  | 2.09344   | -1.862505 | 0.021285  |
| H  | 2.390864  | 0.18333   | -1.823736 |
| Na | -3.161172 | 1.053728  | 0.285978  |

146. Transition States of 4th Gal-L3b C=O Migration

25

|    |           |           |           |
|----|-----------|-----------|-----------|
| C  | 3.419786  | -0.067296 | -0.064465 |
| C  | 2.173174  | 0.11921   | 0.793293  |
| C  | 1.057139  | -0.783842 | 0.315887  |
| O  | 1.38534   | -2.002331 | 0.014247  |
| C  | -0.332824 | -0.479237 | 0.071773  |
| C  | -1.056934 | 0.747246  | 0.673109  |
| C  | -1.589773 | 1.697564  | -0.389551 |
| O  | -2.523125 | 0.975897  | -1.191682 |
| O  | -2.156987 | 0.191018  | 1.395888  |
| O  | -1.036092 | -1.487617 | -0.321925 |
| O  | 1.763011  | 1.462242  | 0.794502  |
| O  | 3.063409  | 0.486907  | -1.319635 |
| H  | -0.388185 | 1.296859  | 1.332034  |
| H  | 3.678333  | -1.125366 | -0.13903  |
| H  | 0.435692  | -0.011683 | -0.834636 |
| H  | -2.085911 | 2.541686  | 0.099709  |
| H  | -0.761    | 2.074735  | -0.996318 |
| H  | 0.522596  | -2.452261 | -0.186261 |
| H  | -2.805931 | 1.520585  | -1.931016 |
| H  | -2.343013 | 0.725551  | 2.172235  |
| H  | 3.802306  | 0.443823  | -1.93215  |
| H  | 4.24268   | 0.486232  | 0.396763  |
| H  | 2.093315  | 1.862547  | -0.021627 |
| H  | 2.390837  | -0.182938 | 1.823735  |
| Na | -3.160871 | -1.053688 | -0.286807 |

147. Reactant of 4th Gal-L3b C=O Migration

25

|    |           |           |           |
|----|-----------|-----------|-----------|
| C  | 3.419786  | -0.067296 | -0.064465 |
| C  | 2.173174  | 0.11921   | 0.793293  |
| C  | 1.057139  | -0.783842 | 0.315887  |
| O  | 1.38534   | -2.002331 | 0.014247  |
| C  | -0.332824 | -0.479237 | 0.071773  |
| C  | -1.056934 | 0.747246  | 0.673109  |
| C  | -1.589773 | 1.697564  | -0.389551 |
| O  | -2.523125 | 0.975897  | -1.191682 |
| O  | -2.156987 | 0.191018  | 1.395888  |
| O  | -1.036092 | -1.487617 | -0.321925 |
| O  | 1.763011  | 1.462242  | 0.794502  |
| O  | 3.063409  | 0.486907  | -1.319635 |
| H  | -0.388185 | 1.296859  | 1.332034  |
| H  | 3.678333  | -1.125366 | -0.13903  |
| H  | 0.435692  | -0.011683 | -0.834636 |
| H  | -2.085911 | 2.541686  | 0.099709  |
| H  | -0.761    | 2.074735  | -0.996318 |
| H  | 0.522596  | -2.452261 | -0.186261 |
| H  | -2.805931 | 1.520585  | -1.931016 |
| H  | -2.343013 | 0.725551  | 2.172235  |
| H  | 3.802306  | 0.443823  | -1.93215  |
| H  | 4.24268   | 0.486232  | 0.396763  |
| H  | 2.093315  | 1.862547  | -0.021627 |
| H  | 2.390837  | -0.182938 | 1.823735  |
| Na | -3.160871 | -1.053688 | -0.286807 |

# 148. Transition States of 1st Iso-L1 C-C cleavage

46

|    |           |           |           |
|----|-----------|-----------|-----------|
| O  | 0.23214   | 1.679184  | 0.011973  |
| O  | 1.213904  | 0.675719  | -2.132049 |
| O  | 4.385726  | 0.777383  | -0.489477 |
| O  | 1.912846  | -1.853751 | -1.204113 |
| O  | 1.313516  | -0.108552 | 0.819777  |
| O  | 4.704708  | -1.11493  | 1.62143   |
| C  | 1.510958  | 1.173181  | 0.22858   |
| C  | 2.166849  | 1.097015  | -1.163381 |
| C  | 3.34602   | 0.121933  | -1.17953  |
| C  | 2.980566  | -1.208859 | -0.507702 |
| C  | 2.439466  | -0.984123 | 0.900314  |
| C  | 3.464513  | -0.495752 | 1.932914  |
| H  | 0.675891  | 1.442603  | -2.365524 |
| H  | 4.99336   | 0.132319  | -0.096293 |
| H  | 2.211103  | -2.123502 | -2.081477 |
| H  | 5.293292  | -1.087387 | 2.384157  |
| H  | 2.094229  | 1.815588  | 0.903232  |
| H  | 2.555274  | 2.090379  | -1.413701 |
| H  | 3.6154    | -0.058485 | -2.230661 |
| H  | 3.857015  | -1.863784 | -0.460163 |
| H  | 2.018789  | -1.936926 | 1.234476  |
| H  | 3.564421  | 0.593382  | 1.890753  |
| H  | 3.118836  | -0.779973 | 2.931874  |
| O  | -2.646167 | -2.549936 | -0.660846 |
| O  | -5.322473 | -0.480908 | 0.441585  |
| O  | -1.626467 | -1.090225 | 0.930353  |
| O  | -2.175993 | 0.571193  | -1.123972 |
| O  | -2.120543 | 3.116379  | -0.256277 |
| C  | -3.723256 | -1.823034 | -0.679072 |
| C  | -4.28803  | -1.381863 | 0.508688  |
| C  | -2.647393 | -0.313864 | 1.025663  |
| C  | -2.721135 | 0.915566  | 0.141411  |
| C  | -1.998996 | 2.132186  | 0.753618  |
| C  | -0.548416 | 1.921533  | 1.175668  |
| H  | -1.742678 | 3.956954  | 0.028624  |
| H  | -6.10226  | -0.80887  | 0.906007  |
| H  | -2.089195 | -2.206319 | 0.165441  |
| H  | -2.161612 | 1.38738   | -1.645774 |
| H  | -4.207224 | -2.00851  | 1.394202  |
| H  | -3.096264 | -0.162369 | 2.017448  |
| H  | -3.772458 | 1.209922  | 0.02891   |
| H  | -2.561189 | 2.420459  | 1.654934  |
| H  | -0.177161 | 2.825817  | 1.680391  |
| H  | -0.476323 | 1.074597  | 1.867344  |
| H  | -4.070771 | -1.448349 | -1.64268  |
| Na | -0.217901 | -0.76008  | -0.876509 |



## 149. Reactant of 1st Iso-L1 C-C cleavage

46

|    |           |           |           |
|----|-----------|-----------|-----------|
| O  | 0.23214   | 1.679184  | 0.011973  |
| O  | 1.213904  | 0.675719  | -2.132049 |
| O  | 4.385726  | 0.777383  | -0.489477 |
| O  | 1.912846  | -1.853751 | -1.204113 |
| O  | 1.313516  | -0.108552 | 0.819777  |
| O  | 4.704708  | -1.11493  | 1.62143   |
| C  | 1.510958  | 1.173181  | 0.22858   |
| C  | 2.166849  | 1.097015  | -1.163381 |
| C  | 3.34602   | 0.121933  | -1.17953  |
| C  | 2.980566  | -1.208859 | -0.507702 |
| C  | 2.439466  | -0.984123 | 0.900314  |
| C  | 3.464513  | -0.495752 | 1.932914  |
| H  | 0.675891  | 1.442603  | -2.365524 |
| H  | 4.99336   | 0.132319  | -0.096293 |
| H  | 2.211103  | -2.123502 | -2.081477 |
| H  | 5.293292  | -1.087387 | 2.384157  |
| H  | 2.094229  | 1.815588  | 0.903232  |
| H  | 2.555274  | 2.090379  | -1.413701 |
| H  | 3.6154    | -0.058485 | -2.230661 |
| H  | 3.857015  | -1.863784 | -0.460163 |
| H  | 2.018789  | -1.936926 | 1.234476  |
| H  | 3.564421  | 0.593382  | 1.890753  |
| H  | 3.118836  | -0.779973 | 2.931874  |
| O  | -2.646167 | -2.549936 | -0.660846 |
| O  | -5.322473 | -0.480908 | 0.441585  |
| O  | -1.626467 | -1.090225 | 0.930353  |
| O  | -2.175993 | 0.571193  | -1.123972 |
| O  | -2.120543 | 3.116379  | -0.256277 |
| C  | -3.723256 | -1.823034 | -0.679072 |
| C  | -4.28803  | -1.381863 | 0.508688  |
| C  | -2.647393 | -0.313864 | 1.025663  |
| C  | -2.721135 | 0.915566  | 0.141411  |
| C  | -1.998996 | 2.132186  | 0.753618  |
| C  | -0.548416 | 1.921533  | 1.175668  |
| H  | -1.742678 | 3.956954  | 0.028624  |
| H  | -6.10226  | -0.80887  | 0.906007  |
| H  | -2.089195 | -2.206319 | 0.165441  |
| H  | -2.161612 | 1.38738   | -1.645774 |
| H  | -4.207224 | -2.00851  | 1.394202  |
| H  | -3.096264 | -0.162369 | 2.017448  |
| H  | -3.772458 | 1.209922  | 0.02891   |
| H  | -2.561189 | 2.420459  | 1.654934  |
| H  | -0.177161 | 2.825817  | 1.680391  |
| H  | -0.476323 | 1.074597  | 1.867344  |
| H  | -4.070771 | -1.448349 | -1.64268  |
| Na | -0.217901 | -0.76008  | -0.876509 |

## 150. Transition States of 2nd Iso-L1 C-C cleavage

46

|    |           |           |           |
|----|-----------|-----------|-----------|
| O  | 0.212102  | 1.637028  | 0.003882  |
| O  | 1.216227  | 0.663951  | -2.138995 |
| O  | 4.387635  | 0.79063   | -0.497479 |
| O  | 1.925621  | -1.854889 | -1.195123 |
| O  | 1.325126  | -0.119563 | 0.828593  |
| O  | 4.72979   | -1.088294 | 1.617447  |
| C  | 1.500364  | 1.161448  | 0.225309  |
| C  | 2.162421  | 1.09054   | -1.164863 |
| C  | 3.349944  | 0.125679  | -1.181042 |
| C  | 2.995296  | -1.205698 | -0.505143 |
| C  | 2.46039   | -0.982021 | 0.905344  |
| C  | 3.485323  | -0.477814 | 1.929973  |
| H  | 0.69632   | 1.434925  | -2.397849 |
| H  | 4.999284  | 0.150979  | -0.101674 |
| H  | 2.218242  | -2.116613 | -2.076833 |
| H  | 5.322365  | -1.047054 | 2.376447  |
| H  | 2.068275  | 1.820677  | 0.896582  |
| H  | 2.542437  | 2.087794  | -1.411478 |
| H  | 3.61689   | -0.055621 | -2.232709 |
| H  | 3.874607  | -1.857165 | -0.462078 |
| H  | 2.052858  | -1.938495 | 1.245423  |
| H  | 3.574852  | 0.61192   | 1.879728  |
| H  | 3.146413  | -0.758335 | 2.93231   |
| O  | -2.649013 | -2.548441 | -0.66431  |
| O  | -5.33144  | -0.48721  | 0.440166  |
| O  | -1.63716  | -1.09392  | 0.934163  |
| O  | -2.190452 | 0.576636  | -1.119457 |
| O  | -2.013898 | 3.156575  | -0.236934 |
| C  | -3.72746  | -1.825105 | -0.683638 |
| C  | -4.294277 | -1.387107 | 0.504768  |
| C  | -2.658187 | -0.317775 | 1.028863  |
| C  | -2.730502 | 0.914718  | 0.148245  |
| C  | -1.999392 | 2.137012  | 0.751923  |
| C  | -0.553146 | 1.918515  | 1.170107  |
| H  | -2.784881 | 3.725308  | -0.128848 |
| H  | -6.119291 | -0.832631 | 0.877835  |
| H  | -2.093794 | -2.202468 | 0.165049  |
| H  | -2.09881  | 1.411245  | -1.604491 |
| H  | -4.214622 | -2.016344 | 1.388565  |
| H  | -3.109812 | -0.169789 | 2.020098  |
| H  | -3.786348 | 1.200777  | 0.040734  |
| H  | -2.548069 | 2.446201  | 1.651829  |
| H  | -0.177227 | 2.836483  | 1.638791  |
| H  | -0.484214 | 1.084075  | 1.877058  |
| H  | -4.0739   | -1.448862 | -1.647189 |
| Na | -0.214774 | -0.758307 | -0.862    |

## 151. Reactant of 2nd Iso-L1 C-C cleavage

46

|    |           |           |           |
|----|-----------|-----------|-----------|
| O  | 0.212102  | 1.637028  | 0.003882  |
| O  | 1.216227  | 0.663951  | -2.138995 |
| O  | 4.387635  | 0.79063   | -0.497479 |
| O  | 1.925621  | -1.854889 | -1.195123 |
| O  | 1.325126  | -0.119563 | 0.828593  |
| O  | 4.72979   | -1.088294 | 1.617447  |
| C  | 1.500364  | 1.161448  | 0.225309  |
| C  | 2.162421  | 1.09054   | -1.164863 |
| C  | 3.349944  | 0.125679  | -1.181042 |
| C  | 2.995296  | -1.205698 | -0.505143 |
| C  | 2.46039   | -0.982021 | 0.905344  |
| C  | 3.485323  | -0.477814 | 1.929973  |
| H  | 0.69632   | 1.434925  | -2.397849 |
| H  | 4.999284  | 0.150979  | -0.101674 |
| H  | 2.218242  | -2.116613 | -2.076833 |
| H  | 5.322365  | -1.047054 | 2.376447  |
| H  | 2.068275  | 1.820677  | 0.896582  |
| H  | 2.542437  | 2.087794  | -1.411478 |
| H  | 3.61689   | -0.055621 | -2.232709 |
| H  | 3.874607  | -1.857165 | -0.462078 |
| H  | 2.052858  | -1.938495 | 1.245423  |
| H  | 3.574852  | 0.61192   | 1.879728  |
| H  | 3.146413  | -0.758335 | 2.93231   |
| O  | -2.649013 | -2.548441 | -0.66431  |
| O  | -5.33144  | -0.48721  | 0.440166  |
| O  | -1.63716  | -1.09392  | 0.934163  |
| O  | -2.190452 | 0.576636  | -1.119457 |
| O  | -2.013898 | 3.156575  | -0.236934 |
| C  | -3.72746  | -1.825105 | -0.683638 |
| C  | -4.294277 | -1.387107 | 0.504768  |
| C  | -2.658187 | -0.317775 | 1.028863  |
| C  | -2.730502 | 0.914718  | 0.148245  |
| C  | -1.999392 | 2.137012  | 0.751923  |
| C  | -0.553146 | 1.918515  | 1.170107  |
| H  | -2.784881 | 3.725308  | -0.128848 |
| H  | -6.119291 | -0.832631 | 0.877835  |
| H  | -2.093794 | -2.202468 | 0.165049  |
| H  | -2.09881  | 1.411245  | -1.604491 |
| H  | -4.214622 | -2.016344 | 1.388565  |
| H  | -3.109812 | -0.169789 | 2.020098  |
| H  | -3.786348 | 1.200777  | 0.040734  |
| H  | -2.548069 | 2.446201  | 1.651829  |
| H  | -0.177227 | 2.836483  | 1.638791  |
| H  | -0.484214 | 1.084075  | 1.877058  |
| H  | -4.0739   | -1.448862 | -1.647189 |
| Na | -0.214774 | -0.758307 | -0.862    |

## 152. Transition States of 3rd Iso-L1 C-C cleavage

46

|    |           |           |           |
|----|-----------|-----------|-----------|
| O  | -0.202508 | -1.178366 | 0.692567  |
| O  | 1.14036   | 0.58829   | 2.106269  |
| O  | 4.203011  | -0.97288  | 0.996626  |
| O  | 2.550766  | 2.19241   | 0.180756  |
| O  | 1.090259  | -0.028026 | -0.753447 |
| O  | 3.380184  | -1.813126 | -1.478848 |
| C  | 1.115445  | -1.002685 | 0.29592   |
| C  | 1.883095  | -0.471031 | 1.508769  |
| C  | 3.271854  | 0.064991  | 1.121929  |
| C  | 3.209186  | 0.958749  | -0.131517 |
| C  | 2.358362  | 0.382796  | -1.270079 |
| C  | 3.001172  | -0.640967 | -2.192446 |
| H  | 0.414607  | 0.197541  | 2.610515  |
| H  | 4.058749  | -1.454765 | 0.164766  |
| H  | 3.059428  | 2.673698  | 0.845415  |
| H  | 3.835397  | -2.428849 | -2.065917 |
| H  | 1.556613  | -1.935823 | -0.077382 |
| H  | 2.032239  | -1.28792  | 2.222893  |
| H  | 3.612613  | 0.683889  | 1.960209  |
| H  | 4.230829  | 1.146394  | -0.484421 |
| H  | 2.121125  | 1.231886  | -1.922134 |
| H  | 2.270199  | -0.89371  | -2.968341 |
| H  | 3.874783  | -0.174036 | -2.663935 |
| O  | -1.527421 | 2.510229  | -0.984523 |
| O  | -1.814995 | 1.03737   | 1.226976  |
| O  | -1.67007  | 0.262892  | -1.675424 |
| O  | -4.590144 | -1.028081 | -0.084833 |
| O  | -2.567358 | -1.478206 | 1.597799  |
| C  | -2.719129 | 2.364146  | -0.459721 |
| C  | -2.917281 | 1.453989  | 0.554019  |
| C  | -2.879061 | 0.136013  | -1.288907 |
| C  | -3.325819 | -1.195847 | -0.702497 |
| C  | -2.438656 | -1.989033 | 0.279877  |
| C  | -0.944047 | -2.128604 | -0.055648 |
| H  | -3.50768  | -1.51155  | 1.82945   |
| H  | -1.948664 | 0.115783  | 1.550138  |
| H  | -1.407469 | 1.426506  | -1.518435 |
| H  | -5.277662 | -1.522896 | -0.543943 |
| H  | -3.898525 | 1.260409  | 0.979825  |
| H  | -3.689724 | 0.612591  | -1.856414 |
| H  | -3.415629 | -1.823794 | -1.604303 |
| H  | -2.861902 | -3.00241  | 0.263048  |
| H  | -0.609422 | -3.132067 | 0.23175   |
| H  | -0.78427  | -1.980652 | -1.129219 |
| H  | -3.569711 | 2.870003  | -0.918942 |
| Na | 0.206971  | 1.872239  | 0.413258  |

## 153. Reactant of 3rd Iso-L1 C-C cleavage

46

|    |           |           |           |
|----|-----------|-----------|-----------|
| O  | -0.202508 | -1.178366 | 0.692567  |
| O  | 1.14036   | 0.58829   | 2.106269  |
| O  | 4.203011  | -0.97288  | 0.996626  |
| O  | 2.550766  | 2.19241   | 0.180756  |
| O  | 1.090259  | -0.028026 | -0.753447 |
| O  | 3.380184  | -1.813126 | -1.478848 |
| C  | 1.115445  | -1.002685 | 0.29592   |
| C  | 1.883095  | -0.471031 | 1.508769  |
| C  | 3.271854  | 0.064991  | 1.121929  |
| C  | 3.209186  | 0.958749  | -0.131517 |
| C  | 2.358362  | 0.382796  | -1.270079 |
| C  | 3.001172  | -0.640967 | -2.192446 |
| H  | 0.414607  | 0.197541  | 2.610515  |
| H  | 4.058749  | -1.454765 | 0.164766  |
| H  | 3.059428  | 2.673698  | 0.845415  |
| H  | 3.835397  | -2.428849 | -2.065917 |
| H  | 1.556613  | -1.935823 | -0.077382 |
| H  | 2.032239  | -1.28792  | 2.222893  |
| H  | 3.612613  | 0.683889  | 1.960209  |
| H  | 4.230829  | 1.146394  | -0.484421 |
| H  | 2.121125  | 1.231886  | -1.922134 |
| H  | 2.270199  | -0.89371  | -2.968341 |
| H  | 3.874783  | -0.174036 | -2.663935 |
| O  | -1.527421 | 2.510229  | -0.984523 |
| O  | -1.814995 | 1.03737   | 1.226976  |
| O  | -1.67007  | 0.262892  | -1.675424 |
| O  | -4.590144 | -1.028081 | -0.084833 |
| O  | -2.567358 | -1.478206 | 1.597799  |
| C  | -2.719129 | 2.364146  | -0.459721 |
| C  | -2.917281 | 1.453989  | 0.554019  |
| C  | -2.879061 | 0.136013  | -1.288907 |
| C  | -3.325819 | -1.195847 | -0.702497 |
| C  | -2.438656 | -1.989033 | 0.279877  |
| C  | -0.944047 | -2.128604 | -0.055648 |
| H  | -3.50768  | -1.51155  | 1.82945   |
| H  | -1.948664 | 0.115783  | 1.550138  |
| H  | -1.407469 | 1.426506  | -1.518435 |
| H  | -5.277662 | -1.522896 | -0.543943 |
| H  | -3.898525 | 1.260409  | 0.979825  |
| H  | -3.689724 | 0.612591  | -1.856414 |
| H  | -3.415629 | -1.823794 | -1.604303 |
| H  | -2.861902 | -3.00241  | 0.263048  |
| H  | -0.609422 | -3.132067 | 0.23175   |
| H  | -0.78427  | -1.980652 | -1.129219 |
| H  | -3.569711 | 2.870003  | -0.918942 |
| Na | 0.206971  | 1.872239  | 0.413258  |

## 154. Transition States of 4th Iso-L1 C-C cleavage

46

|    |           |           |           |
|----|-----------|-----------|-----------|
| O  | -0.200155 | -1.178361 | 0.692132  |
| O  | 1.139946  | 0.592955  | 2.104512  |
| O  | 4.205239  | -0.96615  | 1.000192  |
| O  | 2.546995  | 2.194099  | 0.176182  |
| O  | 1.092831  | -0.030758 | -0.755276 |
| O  | 3.386139  | -1.813357 | -1.473679 |
| C  | 1.11818   | -1.002203 | 0.297072  |
| C  | 1.883927  | -0.466889 | 1.509514  |
| C  | 3.272237  | 0.070361  | 1.122546  |
| C  | 3.208893  | 0.961501  | -0.132714 |
| C  | 2.360801  | 0.381388  | -1.27115  |
| C  | 3.006555  | -0.643297 | -2.1904   |
| H  | 0.415308  | 0.202964  | 2.610919  |
| H  | 4.06285   | -1.449768 | 0.16901   |
| H  | 3.052486  | 2.677067  | 0.842051  |
| H  | 3.842703  | -2.429938 | -2.058797 |
| H  | 1.560947  | -1.93591  | -0.073008 |
| H  | 2.033631  | -1.282162 | 2.225345  |
| H  | 3.61119   | 0.691599  | 1.95983   |
| H  | 4.230498  | 1.150805  | -0.484862 |
| H  | 2.122866  | 1.228655  | -1.9253   |
| H  | 2.277042  | -0.898872 | -2.966741 |
| H  | 3.880122  | -0.176104 | -2.661705 |
| O  | -1.5358   | 2.512822  | -0.982684 |
| O  | -1.816842 | 1.03491   | 1.226799  |
| O  | -1.672731 | 0.266011  | -1.675323 |
| O  | -4.589179 | -1.033684 | -0.084231 |
| O  | -2.564273 | -1.48134  | 1.597405  |
| C  | -2.726279 | 2.362925  | -0.456301 |
| C  | -2.920887 | 1.450485  | 0.556146  |
| C  | -2.881149 | 0.135736  | -1.28766  |
| C  | -3.324651 | -1.197796 | -0.70236  |
| C  | -2.435575 | -1.990391 | 0.278813  |
| C  | -0.941053 | -2.127141 | -0.058583 |
| H  | -3.504392 | -1.516798 | 1.829606  |
| H  | -1.949075 | 0.113196  | 1.550348  |
| H  | -1.413899 | 1.430342  | -1.518434 |
| H  | -5.276003 | -1.528219 | -0.544671 |
| H  | -3.901125 | 1.254135  | 0.982983  |
| H  | -3.693386 | 0.610754  | -1.854231 |
| H  | -3.413058 | -1.825012 | -1.604817 |
| H  | -2.857278 | -3.004378 | 0.261156  |
| H  | -0.604954 | -3.131046 | 0.225575  |
| H  | -0.782087 | -1.97569  | -1.131772 |
| H  | -3.578788 | 2.867487  | -0.913367 |
| Na | 0.201913  | 1.867422  | 0.407558  |

## 155. Reactant of 4th Iso-L1 C-C cleavage

46

|    |           |           |           |
|----|-----------|-----------|-----------|
| O  | -0.200155 | -1.178361 | 0.692132  |
| O  | 1.139946  | 0.592955  | 2.104512  |
| O  | 4.205239  | -0.96615  | 1.000192  |
| O  | 2.546995  | 2.194099  | 0.176182  |
| O  | 1.092831  | -0.030758 | -0.755276 |
| O  | 3.386139  | -1.813357 | -1.473679 |
| C  | 1.11818   | -1.002203 | 0.297072  |
| C  | 1.883927  | -0.466889 | 1.509514  |
| C  | 3.272237  | 0.070361  | 1.122546  |
| C  | 3.208893  | 0.961501  | -0.132714 |
| C  | 2.360801  | 0.381388  | -1.27115  |
| C  | 3.006555  | -0.643297 | -2.1904   |
| H  | 0.415308  | 0.202964  | 2.610919  |
| H  | 4.06285   | -1.449768 | 0.16901   |
| H  | 3.052486  | 2.677067  | 0.842051  |
| H  | 3.842703  | -2.429938 | -2.058797 |
| H  | 1.560947  | -1.93591  | -0.073008 |
| H  | 2.033631  | -1.282162 | 2.225345  |
| H  | 3.61119   | 0.691599  | 1.95983   |
| H  | 4.230498  | 1.150805  | -0.484862 |
| H  | 2.122866  | 1.228655  | -1.9253   |
| H  | 2.277042  | -0.898872 | -2.966741 |
| H  | 3.880122  | -0.176104 | -2.661705 |
| O  | -1.5358   | 2.512822  | -0.982684 |
| O  | -1.816842 | 1.03491   | 1.226799  |
| O  | -1.672731 | 0.266011  | -1.675323 |
| O  | -4.589179 | -1.033684 | -0.084231 |
| O  | -2.564273 | -1.48134  | 1.597405  |
| C  | -2.726279 | 2.362925  | -0.456301 |
| C  | -2.920887 | 1.450485  | 0.556146  |
| C  | -2.881149 | 0.135736  | -1.28766  |
| C  | -3.324651 | -1.197796 | -0.70236  |
| C  | -2.435575 | -1.990391 | 0.278813  |
| C  | -0.941053 | -2.127141 | -0.058583 |
| H  | -3.504392 | -1.516798 | 1.829606  |
| H  | -1.949075 | 0.113196  | 1.550348  |
| H  | -1.413899 | 1.430342  | -1.518434 |
| H  | -5.276003 | -1.528219 | -0.544671 |
| H  | -3.901125 | 1.254135  | 0.982983  |
| H  | -3.693386 | 0.610754  | -1.854231 |
| H  | -3.413058 | -1.825012 | -1.604817 |
| H  | -2.857278 | -3.004378 | 0.261156  |
| H  | -0.604954 | -3.131046 | 0.225575  |
| H  | -0.782087 | -1.97569  | -1.131772 |
| H  | -3.578788 | 2.867487  | -0.913367 |
| Na | 0.201913  | 1.867422  | 0.407558  |

## 156. Transition States of 1st Iso-L1 C=O Migration

46

|    |           |           |           |
|----|-----------|-----------|-----------|
| O  | -0.483633 | -1.829478 | 0.98069   |
| O  | -1.492631 | -1.692634 | -1.459403 |
| O  | -4.560673 | -0.495056 | 0.11911   |
| O  | -2.109034 | 1.09706   | -2.09056  |
| O  | -0.963165 | 0.327259  | 0.396863  |
| O  | -3.408046 | 1.022443  | 2.09368   |
| C  | -1.524671 | -0.935302 | 0.778671  |
| C  | -2.383179 | -1.459992 | -0.367274 |
| C  | -3.469589 | -0.433852 | -0.75354  |
| C  | -2.892963 | 0.993824  | -0.895895 |
| C  | -1.90721  | 1.386221  | 0.212157  |
| C  | -2.487976 | 1.934507  | 1.507232  |
| H  | -1.852274 | -2.378683 | -2.033114 |
| H  | -4.356861 | -0.026222 | 0.945788  |
| H  | -2.681658 | 1.042996  | -2.865365 |
| H  | -3.816015 | 1.411945  | 2.876716  |
| H  | -2.113127 | -0.803909 | 1.695629  |
| H  | -2.873493 | -2.387431 | -0.054167 |
| H  | -3.851807 | -0.726727 | -1.740014 |
| H  | -3.728226 | 1.704687  | -0.922823 |
| H  | -1.308033 | 2.20915   | -0.194987 |
| H  | -1.654642 | 2.12848   | 2.192455  |
| H  | -2.984016 | 2.884723  | 1.274028  |
| O  | 2.936248  | 2.906982  | 0.245926  |
| O  | 1.953271  | 1.22732   | -1.419068 |
| O  | 4.58882   | -0.738358 | 0.092633  |
| O  | 1.304695  | -1.654529 | -1.03055  |
| O  | 2.666747  | -0.333236 | 2.134229  |
| C  | 3.524624  | 1.756018  | 0.198276  |
| C  | 3.030054  | 0.846007  | -0.799092 |
| C  | 3.40584   | -0.633517 | -0.679631 |
| C  | 2.2603    | -1.416666 | -0.013687 |
| C  | 1.667608  | -0.661544 | 1.18734   |
| C  | 0.543061  | -1.429954 | 1.894478  |
| H  | 3.394335  | -0.969444 | 2.101691  |
| H  | 2.169899  | 2.818651  | -0.381067 |
| H  | 5.252168  | -1.261269 | -0.370593 |
| H  | 0.536309  | -2.11143  | -0.647192 |
| H  | 4.088477  | 1.378773  | -1.202244 |
| H  | 3.532059  | -1.045284 | -1.68618  |
| H  | 2.692007  | -2.370273 | 0.334324  |
| H  | 1.256287  | 0.284048  | 0.824706  |
| H  | 0.934962  | -2.353447 | 2.331961  |
| H  | 0.130191  | -0.809755 | 2.698748  |
| H  | 4.381129  | 1.579017  | 0.839028  |
| Na | 0.072376  | 0.129521  | -1.830903 |



## 157. Reactant of 1st Iso-L1 C=O Migration

46

|    |           |           |           |
|----|-----------|-----------|-----------|
| O  | -0.483633 | -1.829478 | 0.98069   |
| O  | -1.492631 | -1.692634 | -1.459403 |
| O  | -4.560673 | -0.495056 | 0.11911   |
| O  | -2.109034 | 1.09706   | -2.09056  |
| O  | -0.963165 | 0.327259  | 0.396863  |
| O  | -3.408046 | 1.022443  | 2.09368   |
| C  | -1.524671 | -0.935302 | 0.778671  |
| C  | -2.383179 | -1.459992 | -0.367274 |
| C  | -3.469589 | -0.433852 | -0.75354  |
| C  | -2.892963 | 0.993824  | -0.895895 |
| C  | -1.90721  | 1.386221  | 0.212157  |
| C  | -2.487976 | 1.934507  | 1.507232  |
| H  | -1.852274 | -2.378683 | -2.033114 |
| H  | -4.356861 | -0.026222 | 0.945788  |
| H  | -2.681658 | 1.042996  | -2.865365 |
| H  | -3.816015 | 1.411945  | 2.876716  |
| H  | -2.113127 | -0.803909 | 1.695629  |
| H  | -2.873493 | -2.387431 | -0.054167 |
| H  | -3.851807 | -0.726727 | -1.740014 |
| H  | -3.728226 | 1.704687  | -0.922823 |
| H  | -1.308033 | 2.20915   | -0.194987 |
| H  | -1.654642 | 2.12848   | 2.192455  |
| H  | -2.984016 | 2.884723  | 1.274028  |
| O  | 2.936248  | 2.906982  | 0.245926  |
| O  | 1.953271  | 1.22732   | -1.419068 |
| O  | 4.58882   | -0.738358 | 0.092633  |
| O  | 1.304695  | -1.654529 | -1.03055  |
| O  | 2.666747  | -0.333236 | 2.134229  |
| C  | 3.524624  | 1.756018  | 0.198276  |
| C  | 3.030054  | 0.846007  | -0.799092 |
| C  | 3.40584   | -0.633517 | -0.679631 |
| C  | 2.2603    | -1.416666 | -0.013687 |
| C  | 1.667608  | -0.661544 | 1.18734   |
| C  | 0.543061  | -1.429954 | 1.894478  |
| H  | 3.394335  | -0.969444 | 2.101691  |
| H  | 2.169899  | 2.818651  | -0.381067 |
| H  | 5.252168  | -1.261269 | -0.370593 |
| H  | 0.536309  | -2.11143  | -0.647192 |
| H  | 4.088477  | 1.378773  | -1.202244 |
| H  | 3.532059  | -1.045284 | -1.68618  |
| H  | 2.692007  | -2.370273 | 0.334324  |
| H  | 1.256287  | 0.284048  | 0.824706  |
| H  | 0.934962  | -2.353447 | 2.331961  |
| H  | 0.130191  | -0.809755 | 2.698748  |
| H  | 4.381129  | 1.579017  | 0.839028  |
| Na | 0.072376  | 0.129521  | -1.830903 |

## 158. Transition States of 2nd Iso-L1 C=O Migration

46

|    |           |           |           |
|----|-----------|-----------|-----------|
| O  | -0.506127 | -2.002155 | 0.609681  |
| O  | -1.512859 | -1.382271 | -1.75573  |
| O  | -4.555857 | -0.466169 | 0.04544   |
| O  | -2.095197 | 1.484005  | -1.84375  |
| O  | -0.949833 | 0.233769  | 0.460174  |
| O  | -3.367679 | 0.638701  | 2.266349  |
| C  | -1.533134 | -1.06811  | 0.587056  |
| C  | -2.397904 | -1.351506 | -0.636359 |
| C  | -3.470353 | -0.255815 | -0.811182 |
| C  | -2.871809 | 1.164015  | -0.684327 |
| C  | -1.875483 | 1.325793  | 0.471506  |
| C  | -2.448375 | 1.638626  | 1.845825  |
| H  | -1.88167  | -1.942092 | -2.448532 |
| H  | -4.339745 | -0.164757 | 0.943591  |
| H  | -2.672777 | 1.583552  | -2.610448 |
| H  | -3.791831 | 0.896912  | 3.093924  |
| H  | -2.121202 | -1.111059 | 1.513087  |
| H  | -2.900762 | -2.314948 | -0.50384  |
| H  | -3.864199 | -0.350249 | -1.831304 |
| H  | -3.696296 | 1.878321  | -0.566734 |
| H  | -1.260495 | 2.197649  | 0.219079  |
| H  | -1.612285 | 1.70694   | 2.551659  |
| H  | -2.941488 | 2.61668   | 1.787097  |
| O  | 2.99136   | 2.872973  | 0.658034  |
| O  | 1.901014  | 1.472099  | -1.096756 |
| O  | 4.615845  | -0.760324 | -0.121801 |
| O  | 1.28324   | -1.412646 | -1.319599 |
| O  | 2.756659  | -0.976848 | 1.967317  |
| C  | 3.595785  | 1.75674   | 0.42753   |
| C  | 3.02549   | 0.979432  | -0.643575 |
| C  | 3.396824  | -0.508584 | -0.771522 |
| C  | 2.245737  | -1.4053   | -0.282633 |
| C  | 1.661675  | -0.926555 | 1.055423  |
| C  | 0.522447  | -1.814312 | 1.577983  |
| H  | 2.500537  | -0.643559 | 2.835758  |
| H  | 2.188229  | 2.812781  | 0.053879  |
| H  | 4.434092  | -0.987937 | 0.802044  |
| H  | 0.53192   | -1.971086 | -1.061012 |
| H  | 4.035126  | 1.536493  | -1.077161 |
| H  | 3.531695  | -0.73772  | -1.832477 |
| H  | 2.668938  | -2.411376 | -0.140362 |
| H  | 1.301076  | 0.100925  | 0.93693   |
| H  | 0.917226  | -2.809834 | 1.80116   |
| H  | 0.102814  | -1.388052 | 2.500636  |
| H  | 4.519055  | 1.541468  | 0.955522  |
| Na | 0.069282  | 0.467756  | -1.790155 |

## 159. Reactant of 2nd Iso-L1 C=O Migration

46

|    |           |           |           |
|----|-----------|-----------|-----------|
| O  | -0.506127 | -2.002155 | 0.609681  |
| O  | -1.512859 | -1.382271 | -1.75573  |
| O  | -4.555857 | -0.466169 | 0.04544   |
| O  | -2.095197 | 1.484005  | -1.84375  |
| O  | -0.949833 | 0.233769  | 0.460174  |
| O  | -3.367679 | 0.638701  | 2.266349  |
| C  | -1.533134 | -1.06811  | 0.587056  |
| C  | -2.397904 | -1.351506 | -0.636359 |
| C  | -3.470353 | -0.255815 | -0.811182 |
| C  | -2.871809 | 1.164015  | -0.684327 |
| C  | -1.875483 | 1.325793  | 0.471506  |
| C  | -2.448375 | 1.638626  | 1.845825  |
| H  | -1.88167  | -1.942092 | -2.448532 |
| H  | -4.339745 | -0.164757 | 0.943591  |
| H  | -2.672777 | 1.583552  | -2.610448 |
| H  | -3.791831 | 0.896912  | 3.093924  |
| H  | -2.121202 | -1.111059 | 1.513087  |
| H  | -2.900762 | -2.314948 | -0.50384  |
| H  | -3.864199 | -0.350249 | -1.831304 |
| H  | -3.696296 | 1.878321  | -0.566734 |
| H  | -1.260495 | 2.197649  | 0.219079  |
| H  | -1.612285 | 1.70694   | 2.551659  |
| H  | -2.941488 | 2.61668   | 1.787097  |
| O  | 2.99136   | 2.872973  | 0.658034  |
| O  | 1.901014  | 1.472099  | -1.096756 |
| O  | 4.615845  | -0.760324 | -0.121801 |
| O  | 1.28324   | -1.412646 | -1.319599 |
| O  | 2.756659  | -0.976848 | 1.967317  |
| C  | 3.595785  | 1.75674   | 0.42753   |
| C  | 3.02549   | 0.979432  | -0.643575 |
| C  | 3.396824  | -0.508584 | -0.771522 |
| C  | 2.245737  | -1.4053   | -0.282633 |
| C  | 1.661675  | -0.926555 | 1.055423  |
| C  | 0.522447  | -1.814312 | 1.577983  |
| H  | 2.500537  | -0.643559 | 2.835758  |
| H  | 2.188229  | 2.812781  | 0.053879  |
| H  | 4.434092  | -0.987937 | 0.802044  |
| H  | 0.53192   | -1.971086 | -1.061012 |
| H  | 4.035126  | 1.536493  | -1.077161 |
| H  | 3.531695  | -0.73772  | -1.832477 |
| H  | 2.668938  | -2.411376 | -0.140362 |
| H  | 1.301076  | 0.100925  | 0.93693   |
| H  | 0.917226  | -2.809834 | 1.80116   |
| H  | 0.102814  | -1.388052 | 2.500636  |
| H  | 4.519055  | 1.541468  | 0.955522  |
| Na | 0.069282  | 0.467756  | -1.790155 |

## 160. Transition States of 3rd Iso-L1 C=O Migration

46

|    |           |           |           |
|----|-----------|-----------|-----------|
| O  | -0.347078 | -1.845887 | 1.161617  |
| O  | -1.406646 | -1.936789 | -1.257577 |
| O  | -4.304939 | -0.741727 | 0.536689  |
| O  | -2.21227  | 0.634191  | -2.126217 |
| O  | -0.973387 | 0.231327  | 0.443267  |
| O  | -3.609422 | 2.661251  | 1.038606  |
| C  | -1.442333 | -1.030987 | 0.918266  |
| C  | -2.286281 | -1.692074 | -0.167632 |
| C  | -3.433477 | -0.754115 | -0.574276 |
| C  | -2.937648 | 0.669006  | -0.888747 |
| C  | -1.998549 | 1.199221  | 0.196842  |
| C  | -2.686918 | 1.68008   | 1.475222  |
| H  | -1.835407 | -2.512489 | -1.901848 |
| H  | -5.146388 | -0.329125 | 0.307095  |
| H  | -2.507106 | 1.355165  | -2.693839 |
| H  | -3.992742 | 3.118109  | 1.795289  |
| H  | -2.031724 | -0.885588 | 1.833682  |
| H  | -2.705434 | -2.626181 | 0.221838  |
| H  | -3.920384 | -1.160686 | -1.471796 |
| H  | -3.800558 | 1.338046  | -0.968284 |
| H  | -1.472403 | 2.063001  | -0.224382 |
| H  | -3.202536 | 0.867261  | 1.994887  |
| H  | -1.917767 | 2.103549  | 2.133405  |
| O  | 2.775725  | 3.011831  | 0.016438  |
| O  | 1.863151  | 1.159013  | -1.509137 |
| O  | 4.637287  | -0.534663 | 0.081416  |
| O  | 1.395978  | -1.724572 | -0.89811  |
| O  | 2.728942  | -0.0857   | 2.127424  |
| C  | 3.427844  | 1.894813  | 0.034278  |
| C  | 2.970156  | 0.888532  | -0.884835 |
| C  | 3.435648  | -0.554349 | -0.668526 |
| C  | 2.351331  | -1.352477 | 0.078269  |
| C  | 1.734214  | -0.544294 | 1.231425  |
| C  | 0.671362  | -1.32064  | 2.019516  |
| H  | 3.488306  | -0.684472 | 2.134587  |
| H  | 2.000375  | 2.839596  | -0.5797   |
| H  | 5.321397  | -1.050178 | -0.359331 |
| H  | 0.673021  | -2.215669 | -0.472117 |
| H  | 3.988836  | 1.452859  | -1.346121 |
| H  | 3.566543  | -1.030106 | -1.645845 |
| H  | 2.846916  | -2.248888 | 0.487438  |
| H  | 1.259652  | 0.345107  | 0.80864   |
| H  | 1.124611  | -2.18515  | 2.514578  |
| H  | 0.238175  | -0.666123 | 2.784901  |
| H  | 4.304645  | 1.811858  | 0.666501  |
| Na | 0.046287  | -0.074761 | -1.777612 |

## 161. Reactant of 3rd Iso-L1 C=O Migration

46

|    |           |           |           |
|----|-----------|-----------|-----------|
| O  | -0.347078 | -1.845887 | 1.161617  |
| O  | -1.406646 | -1.936789 | -1.257577 |
| O  | -4.304939 | -0.741727 | 0.536689  |
| O  | -2.21227  | 0.634191  | -2.126217 |
| O  | -0.973387 | 0.231327  | 0.443267  |
| O  | -3.609422 | 2.661251  | 1.038606  |
| C  | -1.442333 | -1.030987 | 0.918266  |
| C  | -2.286281 | -1.692074 | -0.167632 |
| C  | -3.433477 | -0.754115 | -0.574276 |
| C  | -2.937648 | 0.669006  | -0.888747 |
| C  | -1.998549 | 1.199221  | 0.196842  |
| C  | -2.686918 | 1.68008   | 1.475222  |
| H  | -1.835407 | -2.512489 | -1.901848 |
| H  | -5.146388 | -0.329125 | 0.307095  |
| H  | -2.507106 | 1.355165  | -2.693839 |
| H  | -3.992742 | 3.118109  | 1.795289  |
| H  | -2.031724 | -0.885588 | 1.833682  |
| H  | -2.705434 | -2.626181 | 0.221838  |
| H  | -3.920384 | -1.160686 | -1.471796 |
| H  | -3.800558 | 1.338046  | -0.968284 |
| H  | -1.472403 | 2.063001  | -0.224382 |
| H  | -3.202536 | 0.867261  | 1.994887  |
| H  | -1.917767 | 2.103549  | 2.133405  |
| O  | 2.775725  | 3.011831  | 0.016438  |
| O  | 1.863151  | 1.159013  | -1.509137 |
| O  | 4.637287  | -0.534663 | 0.081416  |
| O  | 1.395978  | -1.724572 | -0.89811  |
| O  | 2.728942  | -0.0857   | 2.127424  |
| C  | 3.427844  | 1.894813  | 0.034278  |
| C  | 2.970156  | 0.888532  | -0.884835 |
| C  | 3.435648  | -0.554349 | -0.668526 |
| C  | 2.351331  | -1.352477 | 0.078269  |
| C  | 1.734214  | -0.544294 | 1.231425  |
| C  | 0.671362  | -1.32064  | 2.019516  |
| H  | 3.488306  | -0.684472 | 2.134587  |
| H  | 2.000375  | 2.839596  | -0.5797   |
| H  | 5.321397  | -1.050178 | -0.359331 |
| H  | 0.673021  | -2.215669 | -0.472117 |
| H  | 3.988836  | 1.452859  | -1.346121 |
| H  | 3.566543  | -1.030106 | -1.645845 |
| H  | 2.846916  | -2.248888 | 0.487438  |
| H  | 1.259652  | 0.345107  | 0.80864   |
| H  | 1.124611  | -2.18515  | 2.514578  |
| H  | 0.238175  | -0.666123 | 2.784901  |
| H  | 4.304645  | 1.811858  | 0.666501  |
| Na | 0.046287  | -0.074761 | -1.777612 |

## 162. Transition States of 4th Iso-L1 C=O Migration

46

|    |           |           |           |
|----|-----------|-----------|-----------|
| O  | -0.34036  | -1.841351 | 1.088605  |
| O  | -1.389024 | -1.886641 | -1.322332 |
| O  | -4.281212 | -0.698611 | 0.492576  |
| O  | -2.124878 | 0.699536  | -2.116594 |
| O  | -0.991253 | 0.262843  | 0.472075  |
| O  | -3.998975 | 2.215616  | 1.083197  |
| C  | -1.446885 | -1.032553 | 0.877444  |
| C  | -2.279081 | -1.658472 | -0.237586 |
| C  | -3.420816 | -0.704794 | -0.624629 |
| C  | -2.909325 | 0.713547  | -0.917473 |
| C  | -2.023465 | 1.224756  | 0.220975  |
| C  | -2.775183 | 1.628504  | 1.499579  |
| H  | -1.829359 | -2.411096 | -2.001789 |
| H  | -4.867514 | 0.071287  | 0.469597  |
| H  | -2.460921 | 1.358787  | -2.733397 |
| H  | -4.385889 | 2.723402  | 1.805436  |
| H  | -2.042531 | -0.946595 | 1.793756  |
| H  | -2.705942 | -2.599518 | 0.127463  |
| H  | -3.923772 | -1.090934 | -1.523732 |
| H  | -3.764157 | 1.385053  | -1.036568 |
| H  | -1.492097 | 2.103312  | -0.15918  |
| H  | -2.971513 | 0.762313  | 2.136628  |
| H  | -2.158559 | 2.341979  | 2.056482  |
| O  | 2.81687   | 3.019496  | 0.09482   |
| O  | 1.914371  | 1.200357  | -1.472928 |
| O  | 4.66088   | -0.534831 | 0.118873  |
| O  | 1.432315  | -1.697936 | -0.932509 |
| O  | 2.719673  | -0.110899 | 2.140691  |
| C  | 3.465159  | 1.899954  | 0.100239  |
| C  | 3.013443  | 0.912814  | -0.842049 |
| C  | 3.470299  | -0.535847 | -0.648772 |
| C  | 2.372335  | -1.344771 | 0.065852  |
| C  | 1.738203  | -0.556201 | 1.22385   |
| C  | 0.664532  | -1.347675 | 1.979592  |
| H  | 3.478897  | -0.709863 | 2.149876  |
| H  | 2.048797  | 2.859166  | -0.514379 |
| H  | 5.347028  | -1.051348 | -0.317578 |
| H  | 0.702528  | -2.19712  | -0.527559 |
| H  | 4.039599  | 1.481832  | -1.281254 |
| H  | 3.6141    | -0.992214 | -1.633479 |
| H  | 2.859526  | -2.249272 | 0.467037  |
| H  | 1.2669    | 0.339644  | 0.80979   |
| H  | 1.107096  | -2.227528 | 2.457302  |
| H  | 0.223114  | -0.711942 | 2.755693  |
| H  | 4.334337  | 1.802062  | 0.740749  |
| Na | 0.092525  | -0.023419 | -1.763165 |

## 163. Reactant of 4th Iso-L1 C=O Migration

46

|    |           |           |           |
|----|-----------|-----------|-----------|
| O  | -0.34036  | -1.841351 | 1.088605  |
| O  | -1.389024 | -1.886641 | -1.322332 |
| O  | -4.281212 | -0.698611 | 0.492576  |
| O  | -2.124878 | 0.699536  | -2.116594 |
| O  | -0.991253 | 0.262843  | 0.472075  |
| O  | -3.998975 | 2.215616  | 1.083197  |
| C  | -1.446885 | -1.032553 | 0.877444  |
| C  | -2.279081 | -1.658472 | -0.237586 |
| C  | -3.420816 | -0.704794 | -0.624629 |
| C  | -2.909325 | 0.713547  | -0.917473 |
| C  | -2.023465 | 1.224756  | 0.220975  |
| C  | -2.775183 | 1.628504  | 1.499579  |
| H  | -1.829359 | -2.411096 | -2.001789 |
| H  | -4.867514 | 0.071287  | 0.469597  |
| H  | -2.460921 | 1.358787  | -2.733397 |
| H  | -4.385889 | 2.723402  | 1.805436  |
| H  | -2.042531 | -0.946595 | 1.793756  |
| H  | -2.705942 | -2.599518 | 0.127463  |
| H  | -3.923772 | -1.090934 | -1.523732 |
| H  | -3.764157 | 1.385053  | -1.036568 |
| H  | -1.492097 | 2.103312  | -0.15918  |
| H  | -2.971513 | 0.762313  | 2.136628  |
| H  | -2.158559 | 2.341979  | 2.056482  |
| O  | 2.81687   | 3.019496  | 0.09482   |
| O  | 1.914371  | 1.200357  | -1.472928 |
| O  | 4.66088   | -0.534831 | 0.118873  |
| O  | 1.432315  | -1.697936 | -0.932509 |
| O  | 2.719673  | -0.110899 | 2.140691  |
| C  | 3.465159  | 1.899954  | 0.100239  |
| C  | 3.013443  | 0.912814  | -0.842049 |
| C  | 3.470299  | -0.535847 | -0.648772 |
| C  | 2.372335  | -1.344771 | 0.065852  |
| C  | 1.738203  | -0.556201 | 1.22385   |
| C  | 0.664532  | -1.347675 | 1.979592  |
| H  | 3.478897  | -0.709863 | 2.149876  |
| H  | 2.048797  | 2.859166  | -0.514379 |
| H  | 5.347028  | -1.051348 | -0.317578 |
| H  | 0.702528  | -2.19712  | -0.527559 |
| H  | 4.039599  | 1.481832  | -1.281254 |
| H  | 3.6141    | -0.992214 | -1.633479 |
| H  | 2.859526  | -2.249272 | 0.467037  |
| H  | 1.2669    | 0.339644  | 0.80979   |
| H  | 1.107096  | -2.227528 | 2.457302  |
| H  | 0.223114  | -0.711942 | 2.755693  |
| H  | 4.334337  | 1.802062  | 0.740749  |
| Na | 0.092525  | -0.023419 | -1.763165 |

## 164. Transition States of 1st Iso-L2 C-C cleavage

46

|    |           |           |           |
|----|-----------|-----------|-----------|
| O  | -0.425513 | -0.745514 | -0.623289 |
| O  | 0.544088  | -0.137389 | 1.829416  |
| O  | 3.488992  | -1.811568 | 0.667609  |
| O  | 2.603187  | 1.713433  | 1.239764  |
| O  | 1.420036  | 0.396722  | -0.944836 |
| O  | 4.96635   | -0.286022 | -1.305271 |
| C  | 0.963003  | -0.850205 | -0.442805 |
| C  | 1.325653  | -1.013765 | 1.043294  |
| C  | 2.814302  | -0.725491 | 1.264326  |
| C  | 3.245942  | 0.597947  | 0.618052  |
| C  | 2.828435  | 0.655662  | -0.848241 |
| C  | 3.634906  | -0.247295 | -1.794462 |
| H  | -0.350913 | -0.51846  | 1.902646  |
| H  | 4.396595  | -1.56478  | 0.435207  |
| H  | 2.951415  | 1.83292   | 2.131958  |
| H  | 5.567231  | -0.585923 | -1.996804 |
| H  | 1.365754  | -1.684566 | -1.033609 |
| H  | 1.162485  | -2.056574 | 1.341689  |
| H  | 2.994586  | -0.682379 | 2.348366  |
| H  | 4.33293   | 0.711675  | 0.681078  |
| H  | 2.934449  | 1.695815  | -1.169276 |
| H  | 3.211986  | -1.255873 | -1.820292 |
| H  | 3.593482  | 0.177265  | -2.80263  |
| O  | -0.747369 | 2.091258  | -1.289635 |
| O  | -1.947643 | 1.608928  | 1.075821  |
| O  | -4.616605 | 0.587227  | -1.014981 |
| O  | -2.218598 | -0.651569 | 1.721093  |
| O  | -3.344458 | -2.887916 | -0.479639 |
| C  | -2.123856 | 1.804237  | -1.346885 |
| C  | -2.686975 | 1.439865  | 0.00711   |
| C  | -3.925668 | 0.84056   | 0.138882  |
| C  | -3.051955 | -0.952855 | 0.792377  |
| C  | -2.615665 | -1.678361 | -0.487644 |
| C  | -1.122798 | -1.978827 | -0.491899 |
| H  | -3.478636 | -3.212274 | -1.377493 |
| H  | -0.247426 | 1.321272  | -1.601344 |
| H  | -5.544867 | 0.39949   | -0.835382 |
| H  | -2.0245   | 0.654979  | 1.608315  |
| H  | -2.655994 | 2.69833   | -1.695223 |
| H  | -4.475394 | 0.941873  | 1.069257  |
| H  | -4.061727 | -1.2598   | 1.092491  |
| H  | -2.878184 | -1.073927 | -1.366331 |
| H  | -0.863167 | -2.490131 | 0.443001  |
| H  | -0.88019  | -2.640402 | -1.333728 |
| H  | -2.3494   | 1.008569  | -2.065796 |
| Na | 0.346163  | 1.928486  | 0.756623  |



## 165. Reactant of 1st Iso-L2 C-C cleavage

46

|    |           |           |           |
|----|-----------|-----------|-----------|
| O  | -0.425513 | -0.745514 | -0.623289 |
| O  | 0.544088  | -0.137389 | 1.829416  |
| O  | 3.488992  | -1.811568 | 0.667609  |
| O  | 2.603187  | 1.713433  | 1.239764  |
| O  | 1.420036  | 0.396722  | -0.944836 |
| O  | 4.96635   | -0.286022 | -1.305271 |
| C  | 0.963003  | -0.850205 | -0.442805 |
| C  | 1.325653  | -1.013765 | 1.043294  |
| C  | 2.814302  | -0.725491 | 1.264326  |
| C  | 3.245942  | 0.597947  | 0.618052  |
| C  | 2.828435  | 0.655662  | -0.848241 |
| C  | 3.634906  | -0.247295 | -1.794462 |
| H  | -0.350913 | -0.51846  | 1.902646  |
| H  | 4.396595  | -1.56478  | 0.435207  |
| H  | 2.951415  | 1.83292   | 2.131958  |
| H  | 5.567231  | -0.585923 | -1.996804 |
| H  | 1.365754  | -1.684566 | -1.033609 |
| H  | 1.162485  | -2.056574 | 1.341689  |
| H  | 2.994586  | -0.682379 | 2.348366  |
| H  | 4.33293   | 0.711675  | 0.681078  |
| H  | 2.934449  | 1.695815  | -1.169276 |
| H  | 3.211986  | -1.255873 | -1.820292 |
| H  | 3.593482  | 0.177265  | -2.80263  |
| O  | -0.747369 | 2.091258  | -1.289635 |
| O  | -1.947643 | 1.608928  | 1.075821  |
| O  | -4.616605 | 0.587227  | -1.014981 |
| O  | -2.218598 | -0.651569 | 1.721093  |
| O  | -3.344458 | -2.887916 | -0.479639 |
| C  | -2.123856 | 1.804237  | -1.346885 |
| C  | -2.686975 | 1.439865  | 0.00711   |
| C  | -3.925668 | 0.84056   | 0.138882  |
| C  | -3.051955 | -0.952855 | 0.792377  |
| C  | -2.615665 | -1.678361 | -0.487644 |
| C  | -1.122798 | -1.978827 | -0.491899 |
| H  | -3.478636 | -3.212274 | -1.377493 |
| H  | -0.247426 | 1.321272  | -1.601344 |
| H  | -5.544867 | 0.39949   | -0.835382 |
| H  | -2.0245   | 0.654979  | 1.608315  |
| H  | -2.655994 | 2.69833   | -1.695223 |
| H  | -4.475394 | 0.941873  | 1.069257  |
| H  | -4.061727 | -1.2598   | 1.092491  |
| H  | -2.878184 | -1.073927 | -1.366331 |
| H  | -0.863167 | -2.490131 | 0.443001  |
| H  | -0.88019  | -2.640402 | -1.333728 |
| H  | -2.3494   | 1.008569  | -2.065796 |
| Na | 0.346163  | 1.928486  | 0.756623  |

## 166. Transition States of 2nd Iso-L2 C-C cleavage

46

|    |           |           |           |
|----|-----------|-----------|-----------|
| O  | 0.325627  | 1.778587  | -0.93919  |
| O  | 0.991792  | -0.523318 | -2.011671 |
| O  | 4.393092  | 0.24415   | -1.035831 |
| O  | 2.109926  | -2.364028 | 0.09385   |
| O  | 1.065918  | 0.299881  | 0.655985  |
| O  | 3.844446  | 1.394692  | 1.419815  |
| C  | 1.456642  | 1.179185  | -0.411644 |
| C  | 2.029964  | 0.332736  | -1.54419  |
| C  | 3.216625  | -0.515157 | -1.061499 |
| C  | 2.940836  | -1.210623 | 0.291907  |
| C  | 2.161315  | -0.355069 | 1.304068  |
| C  | 2.993625  | 0.55924   | 2.193027  |
| H  | 0.270621  | 0.050951  | -2.326087 |
| H  | 4.406818  | 0.80768   | -0.245585 |
| H  | 2.584892  | -3.016109 | -0.436808 |
| H  | 4.42136   | 1.91296   | 1.993916  |
| H  | 2.163885  | 1.922483  | -0.022725 |
| H  | 2.389408  | 0.982916  | -2.348689 |
| H  | 3.373272  | -1.300938 | -1.80995  |
| H  | 3.90177   | -1.512486 | 0.726384  |
| H  | 1.681294  | -1.058557 | 1.994586  |
| H  | 2.304962  | 1.163321  | 2.795503  |
| H  | 3.58703   | -0.076077 | 2.862136  |
| O  | -1.435614 | -1.911166 | 1.50836   |
| O  | -2.331089 | -1.671656 | -0.941709 |
| O  | -4.755018 | 0.370296  | 0.675363  |
| O  | -1.894734 | 0.411328  | -1.909919 |
| O  | -2.568279 | 2.187029  | 1.165955  |
| C  | -2.786201 | -1.47973  | 1.425482  |
| C  | -3.095892 | -1.164371 | -0.019254 |
| C  | -4.048236 | -0.216759 | -0.354714 |
| C  | -2.486815 | 1.092884  | -0.995814 |
| C  | -1.744766 | 1.478175  | 0.278247  |
| C  | -0.576333 | 2.417172  | -0.056723 |
| H  | -3.409276 | 1.725671  | 1.295424  |
| H  | -1.264786 | -2.252386 | 2.393496  |
| H  | -5.643618 | 0.619082  | 0.394234  |
| H  | -2.067711 | -0.76944  | -1.62257  |
| H  | -3.475503 | -2.269327 | 1.752813  |
| H  | -4.483604 | -0.207351 | -1.34875  |
| H  | -3.261868 | 1.808294  | -1.305541 |
| H  | -1.307706 | 0.579569  | 0.738862  |
| H  | -0.948971 | 3.315004  | -0.557344 |
| H  | -0.093933 | 2.709683  | 0.883044  |
| H  | -2.959566 | -0.596751 | 2.051116  |
| Na | -0.045624 | -1.724606 | -0.327173 |

## 167. Reactant of 2nd Iso-L2 C-C cleavage

46

|    |           |           |           |
|----|-----------|-----------|-----------|
| O  | 0.325627  | 1.778587  | -0.93919  |
| O  | 0.991792  | -0.523318 | -2.011671 |
| O  | 4.393092  | 0.24415   | -1.035831 |
| O  | 2.109926  | -2.364028 | 0.09385   |
| O  | 1.065918  | 0.299881  | 0.655985  |
| O  | 3.844446  | 1.394692  | 1.419815  |
| C  | 1.456642  | 1.179185  | -0.411644 |
| C  | 2.029964  | 0.332736  | -1.54419  |
| C  | 3.216625  | -0.515157 | -1.061499 |
| C  | 2.940836  | -1.210623 | 0.291907  |
| C  | 2.161315  | -0.355069 | 1.304068  |
| C  | 2.993625  | 0.55924   | 2.193027  |
| H  | 0.270621  | 0.050951  | -2.326087 |
| H  | 4.406818  | 0.80768   | -0.245585 |
| H  | 2.584892  | -3.016109 | -0.436808 |
| H  | 4.42136   | 1.91296   | 1.993916  |
| H  | 2.163885  | 1.922483  | -0.022725 |
| H  | 2.389408  | 0.982916  | -2.348689 |
| H  | 3.373272  | -1.300938 | -1.80995  |
| H  | 3.90177   | -1.512486 | 0.726384  |
| H  | 1.681294  | -1.058557 | 1.994586  |
| H  | 2.304962  | 1.163321  | 2.795503  |
| H  | 3.58703   | -0.076077 | 2.862136  |
| O  | -1.435614 | -1.911166 | 1.50836   |
| O  | -2.331089 | -1.671656 | -0.941709 |
| O  | -4.755018 | 0.370296  | 0.675363  |
| O  | -1.894734 | 0.411328  | -1.909919 |
| O  | -2.568279 | 2.187029  | 1.165955  |
| C  | -2.786201 | -1.47973  | 1.425482  |
| C  | -3.095892 | -1.164371 | -0.019254 |
| C  | -4.048236 | -0.216759 | -0.354714 |
| C  | -2.486815 | 1.092884  | -0.995814 |
| C  | -1.744766 | 1.478175  | 0.278247  |
| C  | -0.576333 | 2.417172  | -0.056723 |
| H  | -3.409276 | 1.725671  | 1.295424  |
| H  | -1.264786 | -2.252386 | 2.393496  |
| H  | -5.643618 | 0.619082  | 0.394234  |
| H  | -2.067711 | -0.76944  | -1.62257  |
| H  | -3.475503 | -2.269327 | 1.752813  |
| H  | -4.483604 | -0.207351 | -1.34875  |
| H  | -3.261868 | 1.808294  | -1.305541 |
| H  | -1.307706 | 0.579569  | 0.738862  |
| H  | -0.948971 | 3.315004  | -0.557344 |
| H  | -0.093933 | 2.709683  | 0.883044  |
| H  | -2.959566 | -0.596751 | 2.051116  |
| Na | -0.045624 | -1.724606 | -0.327173 |

## 168. Transition States of 3rd Iso-L2 C-C cleavage

46

|    |           |           |           |
|----|-----------|-----------|-----------|
| O  | -0.506412 | -1.484334 | -1.514835 |
| O  | -1.337812 | 0.981991  | -2.029028 |
| O  | -4.433628 | -0.156296 | -0.510784 |
| O  | -1.975712 | 2.275406  | 0.556598  |
| O  | -1.019613 | -0.381371 | 0.410218  |
| O  | -1.901946 | -2.088469 | 2.288263  |
| C  | -1.557169 | -1.022868 | -0.739703 |
| C  | -2.282582 | 0.023748  | -1.582801 |
| C  | -3.356013 | 0.73015   | -0.739875 |
| C  | -2.851867 | 1.151499  | 0.655505  |
| C  | -2.021136 | 0.058007  | 1.330312  |
| C  | -2.836855 | -1.094562 | 1.913729  |
| H  | -0.650932 | 0.503182  | -2.524198 |
| H  | -5.019234 | -0.186255 | -1.276412 |
| H  | -2.469714 | 3.057538  | 0.281718  |
| H  | -2.356483 | -2.784549 | 2.775813  |
| H  | -2.213723 | -1.847259 | -0.427488 |
| H  | -2.769721 | -0.466043 | -2.43619  |
| H  | -3.679729 | 1.631458  | -1.278192 |
| H  | -3.725035 | 1.396063  | 1.272129  |
| H  | -1.451726 | 0.514219  | 2.146282  |
| H  | -3.383308 | -0.69979  | 2.780363  |
| H  | -3.573012 | -1.479665 | 1.201511  |
| O  | 1.28936   | 1.600645  | 1.699613  |
| O  | 2.589323  | 2.075052  | -0.604754 |
| O  | 4.44713   | -0.63557  | 0.73703   |
| O  | 1.589766  | 0.316199  | -1.729276 |
| O  | 2.572711  | -2.531406 | 0.17223   |
| C  | 2.705916  | 1.421635  | 1.695298  |
| C  | 3.124304  | 1.266682  | 0.257917  |
| C  | 3.878243  | 0.18587   | -0.197778 |
| C  | 2.272646  | -0.654392 | -1.210498 |
| C  | 1.593354  | -1.572576 | -0.206204 |
| C  | 0.426612  | -2.331784 | -0.873492 |
| H  | 2.229949  | -3.101579 | 0.871813  |
| H  | 1.001037  | 1.866412  | 2.580134  |
| H  | 4.186018  | -1.555349 | 0.565841  |
| H  | 2.207767  | 1.40556   | -1.408146 |
| H  | 3.213385  | 2.304194  | 2.1047    |
| H  | 4.424595  | 0.325151  | -1.13113  |
| H  | 2.974518  | -1.187149 | -1.866774 |
| H  | 1.228189  | -1.001246 | 0.655053  |
| H  | 0.840111  | -2.985814 | -1.646048 |
| H  | -0.073164 | -2.945871 | -0.110786 |
| H  | 3.00303   | 0.537294  | 2.263417  |
| Na | 0.089012  | 1.632388  | -0.273643 |

## 169. Reactant of 3rd Iso-L2 C-C cleavage

46

|    |           |           |           |
|----|-----------|-----------|-----------|
| O  | -0.506412 | -1.484334 | -1.514835 |
| O  | -1.337812 | 0.981991  | -2.029028 |
| O  | -4.433628 | -0.156296 | -0.510784 |
| O  | -1.975712 | 2.275406  | 0.556598  |
| O  | -1.019613 | -0.381371 | 0.410218  |
| O  | -1.901946 | -2.088469 | 2.288263  |
| C  | -1.557169 | -1.022868 | -0.739703 |
| C  | -2.282582 | 0.023748  | -1.582801 |
| C  | -3.356013 | 0.73015   | -0.739875 |
| C  | -2.851867 | 1.151499  | 0.655505  |
| C  | -2.021136 | 0.058007  | 1.330312  |
| C  | -2.836855 | -1.094562 | 1.913729  |
| H  | -0.650932 | 0.503182  | -2.524198 |
| H  | -5.019234 | -0.186255 | -1.276412 |
| H  | -2.469714 | 3.057538  | 0.281718  |
| H  | -2.356483 | -2.784549 | 2.775813  |
| H  | -2.213723 | -1.847259 | -0.427488 |
| H  | -2.769721 | -0.466043 | -2.43619  |
| H  | -3.679729 | 1.631458  | -1.278192 |
| H  | -3.725035 | 1.396063  | 1.272129  |
| H  | -1.451726 | 0.514219  | 2.146282  |
| H  | -3.383308 | -0.69979  | 2.780363  |
| H  | -3.573012 | -1.479665 | 1.201511  |
| O  | 1.28936   | 1.600645  | 1.699613  |
| O  | 2.589323  | 2.075052  | -0.604754 |
| O  | 4.44713   | -0.63557  | 0.73703   |
| O  | 1.589766  | 0.316199  | -1.729276 |
| O  | 2.572711  | -2.531406 | 0.17223   |
| C  | 2.705916  | 1.421635  | 1.695298  |
| C  | 3.124304  | 1.266682  | 0.257917  |
| C  | 3.878243  | 0.18587   | -0.197778 |
| C  | 2.272646  | -0.654392 | -1.210498 |
| C  | 1.593354  | -1.572576 | -0.206204 |
| C  | 0.426612  | -2.331784 | -0.873492 |
| H  | 2.229949  | -3.101579 | 0.871813  |
| H  | 1.001037  | 1.866412  | 2.580134  |
| H  | 4.186018  | -1.555349 | 0.565841  |
| H  | 2.207767  | 1.40556   | -1.408146 |
| H  | 3.213385  | 2.304194  | 2.1047    |
| H  | 4.424595  | 0.325151  | -1.13113  |
| H  | 2.974518  | -1.187149 | -1.866774 |
| H  | 1.228189  | -1.001246 | 0.655053  |
| H  | 0.840111  | -2.985814 | -1.646048 |
| H  | -0.073164 | -2.945871 | -0.110786 |
| H  | 3.00303   | 0.537294  | 2.263417  |
| Na | 0.089012  | 1.632388  | -0.273643 |

## 170. Transition States of 4th Iso-L2 C-C cleavage

46

|    |           |           |           |
|----|-----------|-----------|-----------|
| O  | 0.260406  | 2.118639  | -0.419913 |
| O  | 1.112175  | 0.408825  | -2.230508 |
| O  | 4.254429  | 0.902027  | -0.582787 |
| O  | 2.034693  | -2.008855 | -0.884743 |
| O  | 1.015032  | 0.219864  | 0.598354  |
| O  | 3.845253  | -0.984928 | 2.518063  |
| C  | 1.403657  | 1.416816  | -0.079995 |
| C  | 2.071499  | 1.050658  | -1.404801 |
| C  | 3.247639  | 0.099798  | -1.168458 |
| C  | 2.891301  | -1.06859  | -0.228161 |
| C  | 2.113697  | -0.604073 | 1.002826  |
| C  | 2.968748  | 0.041062  | 2.093666  |
| H  | 0.384947  | 1.039569  | -2.365473 |
| H  | 5.114819  | 0.471826  | -0.649569 |
| H  | 2.520208  | -2.476237 | -1.575054 |
| H  | 4.414894  | -0.662935 | 3.225091  |
| H  | 2.061968  | 2.011465  | 0.569223  |
| H  | 2.457006  | 1.95837   | -1.88204  |
| H  | 3.559853  | -0.29728  | -2.144514 |
| H  | 3.808765  | -1.563676 | 0.111573  |
| H  | 1.654624  | -1.49359  | 1.447009  |
| H  | 3.52846   | 0.902829  | 1.717736  |
| H  | 2.29473   | 0.364412  | 2.898002  |
| O  | -1.227378 | -2.186669 | 0.733917  |
| O  | -2.559508 | -1.487059 | -1.471288 |
| O  | -4.578233 | 0.02508   | 1.033682  |
| O  | -1.811442 | 0.695498  | -1.574049 |
| O  | -2.62098  | 1.911696  | 1.735343  |
| C  | -2.641809 | -2.086693 | 0.854526  |
| C  | -3.136937 | -1.29225  | -0.328909 |
| C  | -4.020267 | -0.225751 | -0.202203 |
| C  | -2.479281 | 1.170301  | -0.569315 |
| C  | -1.766565 | 1.36548   | 0.764641  |
| C  | -0.654374 | 2.421709  | 0.615842  |
| H  | -3.342232 | 1.295961  | 1.921259  |
| H  | -0.889797 | -2.818765 | 1.379007  |
| H  | -5.488282 | 0.333725  | 0.946939  |
| H  | -2.248323 | -0.42385  | -1.810284 |
| H  | -3.111095 | -3.078241 | 0.813818  |
| H  | -4.576439 | 0.092108  | -1.079389 |
| H  | -3.250107 | 1.924657  | -0.778489 |
| H  | -1.311077 | 0.417558  | 1.084385  |
| H  | -1.11455  | 3.38161   | 0.367001  |
| H  | -0.149735 | 2.515216  | 1.584759  |
| H  | -2.931311 | -1.596832 | 1.788795  |
| Na | -0.106066 | -1.176513 | -1.028758 |

## 171. Reactant of 4th Iso-L2 C-C cleavage

46

|    |           |           |           |
|----|-----------|-----------|-----------|
| O  | 0.260406  | 2.118639  | -0.419913 |
| O  | 1.112175  | 0.408825  | -2.230508 |
| O  | 4.254429  | 0.902027  | -0.582787 |
| O  | 2.034693  | -2.008855 | -0.884743 |
| O  | 1.015032  | 0.219864  | 0.598354  |
| O  | 3.845253  | -0.984928 | 2.518063  |
| C  | 1.403657  | 1.416816  | -0.079995 |
| C  | 2.071499  | 1.050658  | -1.404801 |
| C  | 3.247639  | 0.099798  | -1.168458 |
| C  | 2.891301  | -1.06859  | -0.228161 |
| C  | 2.113697  | -0.604073 | 1.002826  |
| C  | 2.968748  | 0.041062  | 2.093666  |
| H  | 0.384947  | 1.039569  | -2.365473 |
| H  | 5.114819  | 0.471826  | -0.649569 |
| H  | 2.520208  | -2.476237 | -1.575054 |
| H  | 4.414894  | -0.662935 | 3.225091  |
| H  | 2.061968  | 2.011465  | 0.569223  |
| H  | 2.457006  | 1.95837   | -1.88204  |
| H  | 3.559853  | -0.29728  | -2.144514 |
| H  | 3.808765  | -1.563676 | 0.111573  |
| H  | 1.654624  | -1.49359  | 1.447009  |
| H  | 3.52846   | 0.902829  | 1.717736  |
| H  | 2.29473   | 0.364412  | 2.898002  |
| O  | -1.227378 | -2.186669 | 0.733917  |
| O  | -2.559508 | -1.487059 | -1.471288 |
| O  | -4.578233 | 0.02508   | 1.033682  |
| O  | -1.811442 | 0.695498  | -1.574049 |
| O  | -2.62098  | 1.911696  | 1.735343  |
| C  | -2.641809 | -2.086693 | 0.854526  |
| C  | -3.136937 | -1.29225  | -0.328909 |
| C  | -4.020267 | -0.225751 | -0.202203 |
| C  | -2.479281 | 1.170301  | -0.569315 |
| C  | -1.766565 | 1.36548   | 0.764641  |
| C  | -0.654374 | 2.421709  | 0.615842  |
| H  | -3.342232 | 1.295961  | 1.921259  |
| H  | -0.889797 | -2.818765 | 1.379007  |
| H  | -5.488282 | 0.333725  | 0.946939  |
| H  | -2.248323 | -0.42385  | -1.810284 |
| H  | -3.111095 | -3.078241 | 0.813818  |
| H  | -4.576439 | 0.092108  | -1.079389 |
| H  | -3.250107 | 1.924657  | -0.778489 |
| H  | -1.311077 | 0.417558  | 1.084385  |
| H  | -1.11455  | 3.38161   | 0.367001  |
| H  | -0.149735 | 2.515216  | 1.584759  |
| H  | -2.931311 | -1.596832 | 1.788795  |
| Na | -0.106066 | -1.176513 | -1.028758 |

## 172. Transition States of 1st Iso-L2 C=O Migration

46

|    |           |           |           |
|----|-----------|-----------|-----------|
| O  | -0.481397 | 0.646388  | -0.759486 |
| O  | 0.843509  | -1.751253 | -1.067196 |
| O  | 3.597423  | 0.449297  | -1.928842 |
| O  | 3.13152   | -1.758859 | 0.895624  |
| O  | 1.225169  | 0.385962  | 0.724577  |
| O  | 2.12641   | 2.845677  | 1.198076  |
| C  | 0.90052   | 0.620633  | -0.640736 |
| C  | 1.447612  | -0.537079 | -1.469109 |
| C  | 2.971492  | -0.631764 | -1.264396 |
| C  | 3.3987    | -0.528369 | 0.216017  |
| C  | 2.624486  | 0.548927  | 0.982019  |
| C  | 3.120023  | 1.971379  | 0.70411   |
| H  | -0.121006 | -1.704231 | -1.224377 |
| H  | 3.703645  | 0.256201  | -2.867516 |
| H  | 3.790609  | -2.420602 | 0.654488  |
| H  | 2.474627  | 3.743768  | 1.226266  |
| H  | 1.33362   | 1.575452  | -0.967767 |
| H  | 1.25454   | -0.341346 | -2.532885 |
| H  | 3.314222  | -1.600135 | -1.653334 |
| H  | 4.47167   | -0.304263 | 0.241921  |
| H  | 2.727048  | 0.353627  | 2.05377   |
| H  | 4.073997  | 2.089439  | 1.234546  |
| H  | 3.309247  | 2.137749  | -0.362077 |
| O  | -2.012383 | -1.851523 | -1.306125 |
| O  | -1.174038 | -1.743221 | 1.573469  |
| O  | -1.505626 | 0.771454  | 1.980235  |
| O  | -4.50958  | 0.64934   | 0.180178  |
| O  | -2.890598 | 0.872958  | -1.897918 |
| C  | -2.865175 | -1.960838 | -0.155167 |
| C  | -2.18861  | -1.205858 | 0.978031  |
| C  | -2.331474 | 0.216269  | 1.139092  |
| C  | -3.261291 | 1.200269  | 0.472098  |
| C  | -2.580186 | 1.733463  | -0.829049 |
| C  | -1.075629 | 1.947096  | -0.712112 |
| H  | -2.323411 | 0.082271  | -1.852845 |
| H  | -2.309001 | -2.485301 | -1.97206  |
| H  | -0.807713 | 0.100717  | 2.167243  |
| H  | -4.580679 | 0.573986  | -0.785188 |
| H  | -3.856403 | -1.559854 | -0.375907 |
| H  | -3.166929 | -0.908205 | 1.741303  |
| H  | -3.377709 | 2.032104  | 1.17762   |
| H  | -3.057047 | 2.69242   | -1.055423 |
| H  | -0.730356 | 2.530678  | -1.572878 |
| H  | -0.801867 | 2.458097  | 0.218586  |
| H  | -2.939399 | -3.004809 | 0.160634  |
| Na | 0.895656  | -2.061117 | 1.189123  |



## 173. Reactant of 1st Iso-L2 C=O Migration

46

|    |           |           |           |
|----|-----------|-----------|-----------|
| O  | -0.481397 | 0.646388  | -0.759486 |
| O  | 0.843509  | -1.751253 | -1.067196 |
| O  | 3.597423  | 0.449297  | -1.928842 |
| O  | 3.13152   | -1.758859 | 0.895624  |
| O  | 1.225169  | 0.385962  | 0.724577  |
| O  | 2.12641   | 2.845677  | 1.198076  |
| C  | 0.90052   | 0.620633  | -0.640736 |
| C  | 1.447612  | -0.537079 | -1.469109 |
| C  | 2.971492  | -0.631764 | -1.264396 |
| C  | 3.3987    | -0.528369 | 0.216017  |
| C  | 2.624486  | 0.548927  | 0.982019  |
| C  | 3.120023  | 1.971379  | 0.70411   |
| H  | -0.121006 | -1.704231 | -1.224377 |
| H  | 3.703645  | 0.256201  | -2.867516 |
| H  | 3.790609  | -2.420602 | 0.654488  |
| H  | 2.474627  | 3.743768  | 1.226266  |
| H  | 1.33362   | 1.575452  | -0.967767 |
| H  | 1.25454   | -0.341346 | -2.532885 |
| H  | 3.314222  | -1.600135 | -1.653334 |
| H  | 4.47167   | -0.304263 | 0.241921  |
| H  | 2.727048  | 0.353627  | 2.05377   |
| H  | 4.073997  | 2.089439  | 1.234546  |
| H  | 3.309247  | 2.137749  | -0.362077 |
| O  | -2.012383 | -1.851523 | -1.306125 |
| O  | -1.174038 | -1.743221 | 1.573469  |
| O  | -1.505626 | 0.771454  | 1.980235  |
| O  | -4.50958  | 0.64934   | 0.180178  |
| O  | -2.890598 | 0.872958  | -1.897918 |
| C  | -2.865175 | -1.960838 | -0.155167 |
| C  | -2.18861  | -1.205858 | 0.978031  |
| C  | -2.331474 | 0.216269  | 1.139092  |
| C  | -3.261291 | 1.200269  | 0.472098  |
| C  | -2.580186 | 1.733463  | -0.829049 |
| C  | -1.075629 | 1.947096  | -0.712112 |
| H  | -2.323411 | 0.082271  | -1.852845 |
| H  | -2.309001 | -2.485301 | -1.97206  |
| H  | -0.807713 | 0.100717  | 2.167243  |
| H  | -4.580679 | 0.573986  | -0.785188 |
| H  | -3.856403 | -1.559854 | -0.375907 |
| H  | -3.166929 | -0.908205 | 1.741303  |
| H  | -3.377709 | 2.032104  | 1.17762   |
| H  | -3.057047 | 2.69242   | -1.055423 |
| H  | -0.730356 | 2.530678  | -1.572878 |
| H  | -0.801867 | 2.458097  | 0.218586  |
| H  | -2.939399 | -3.004809 | 0.160634  |
| Na | 0.895656  | -2.061117 | 1.189123  |

## 174. Transition States of 2nd Iso-L2 C=O Migration

46

|    |           |           |           |
|----|-----------|-----------|-----------|
| O  | 0.514019  | 0.663581  | 0.772596  |
| O  | -0.897524 | -1.745562 | 1.092366  |
| O  | -3.563899 | 0.569004  | 1.907151  |
| O  | -3.159454 | -1.704301 | -0.878245 |
| O  | -1.17948  | 0.394479  | -0.727236 |
| O  | -2.007377 | 2.869263  | -1.239418 |
| C  | -0.868624 | 0.635919  | 0.636724  |
| C  | -1.442792 | -0.503607 | 1.475157  |
| C  | -2.969386 | -0.543102 | 1.263759  |
| C  | -3.382659 | -0.452261 | -0.222325 |
| C  | -2.569367 | 0.58442   | -1.003606 |
| C  | -3.034241 | 2.024226  | -0.759445 |
| H  | 0.066192  | -1.777383 | 1.296154  |
| H  | -3.692767 | 0.386775  | 2.845058  |
| H  | -3.852503 | -2.330022 | -0.635946 |
| H  | -2.340453 | 3.771235  | -1.303351 |
| H  | -1.301253 | 1.596125  | 0.952413  |
| H  | -1.248101 | -0.301215 | 2.537962  |
| H  | -3.346206 | -1.492907 | 1.665983  |
| H  | -4.447025 | -0.190864 | -0.258328 |
| H  | -2.665707 | 0.3671    | -2.071498 |
| H  | -3.971053 | 2.159656  | -1.315436 |
| H  | -3.244916 | 2.211133  | 0.299218  |
| O  | 1.83899   | -1.759155 | 1.478739  |
| O  | 1.119529  | -1.874463 | -1.493769 |
| O  | 1.509266  | 0.579723  | -2.047263 |
| O  | 4.521828  | 0.557217  | -0.279017 |
| O  | 2.958014  | 0.900537  | 1.783609  |
| C  | 2.69465   | -1.986215 | 0.370361  |
| C  | 2.128662  | -1.328965 | -0.888013 |
| C  | 2.305704  | 0.072396  | -1.152132 |
| C  | 3.264468  | 1.086681  | -0.564278 |
| C  | 2.624852  | 1.747905  | 0.687     |
| C  | 1.112148  | 1.943954  | 0.601447  |
| H  | 3.015042  | 1.402812  | 2.605427  |
| H  | 1.981216  | -0.8436   | 1.772537  |
| H  | 0.816922  | -0.109841 | -2.203    |
| H  | 4.585379  | 0.408002  | 0.675821  |
| H  | 3.710905  | -1.644438 | 0.58601   |
| H  | 3.138422  | -1.130811 | -1.629068 |
| H  | 3.374454  | 1.861219  | -1.332211 |
| H  | 3.107828  | 2.724154  | 0.809012  |
| H  | 0.784452  | 2.608616  | 1.411822  |
| H  | 0.819746  | 2.384681  | -0.360212 |
| H  | 2.711855  | -3.061845 | 0.19004   |
| Na | -0.946747 | -2.208116 | -1.105674 |

## 175. Reactant of 2nd Iso-L2 C=O Migration

46

|    |           |           |           |
|----|-----------|-----------|-----------|
| O  | 0.514019  | 0.663581  | 0.772596  |
| O  | -0.897524 | -1.745562 | 1.092366  |
| O  | -3.563899 | 0.569004  | 1.907151  |
| O  | -3.159454 | -1.704301 | -0.878245 |
| O  | -1.17948  | 0.394479  | -0.727236 |
| O  | -2.007377 | 2.869263  | -1.239418 |
| C  | -0.868624 | 0.635919  | 0.636724  |
| C  | -1.442792 | -0.503607 | 1.475157  |
| C  | -2.969386 | -0.543102 | 1.263759  |
| C  | -3.382659 | -0.452261 | -0.222325 |
| C  | -2.569367 | 0.58442   | -1.003606 |
| C  | -3.034241 | 2.024226  | -0.759445 |
| H  | 0.066192  | -1.777383 | 1.296154  |
| H  | -3.692767 | 0.386775  | 2.845058  |
| H  | -3.852503 | -2.330022 | -0.635946 |
| H  | -2.340453 | 3.771235  | -1.303351 |
| H  | -1.301253 | 1.596125  | 0.952413  |
| H  | -1.248101 | -0.301215 | 2.537962  |
| H  | -3.346206 | -1.492907 | 1.665983  |
| H  | -4.447025 | -0.190864 | -0.258328 |
| H  | -2.665707 | 0.3671    | -2.071498 |
| H  | -3.971053 | 2.159656  | -1.315436 |
| H  | -3.244916 | 2.211133  | 0.299218  |
| O  | 1.83899   | -1.759155 | 1.478739  |
| O  | 1.119529  | -1.874463 | -1.493769 |
| O  | 1.509266  | 0.579723  | -2.047263 |
| O  | 4.521828  | 0.557217  | -0.279017 |
| O  | 2.958014  | 0.900537  | 1.783609  |
| C  | 2.69465   | -1.986215 | 0.370361  |
| C  | 2.128662  | -1.328965 | -0.888013 |
| C  | 2.305704  | 0.072396  | -1.152132 |
| C  | 3.264468  | 1.086681  | -0.564278 |
| C  | 2.624852  | 1.747905  | 0.687     |
| C  | 1.112148  | 1.943954  | 0.601447  |
| H  | 3.015042  | 1.402812  | 2.605427  |
| H  | 1.981216  | -0.8436   | 1.772537  |
| H  | 0.816922  | -0.109841 | -2.203    |
| H  | 4.585379  | 0.408002  | 0.675821  |
| H  | 3.710905  | -1.644438 | 0.58601   |
| H  | 3.138422  | -1.130811 | -1.629068 |
| H  | 3.374454  | 1.861219  | -1.332211 |
| H  | 3.107828  | 2.724154  | 0.809012  |
| H  | 0.784452  | 2.608616  | 1.411822  |
| H  | 0.819746  | 2.384681  | -0.360212 |
| H  | 2.711855  | -3.061845 | 0.19004   |
| Na | -0.946747 | -2.208116 | -1.105674 |

## 176. Transition States of 3rd Iso-L2 C=O Migration

46

|    |           |           |           |
|----|-----------|-----------|-----------|
| O  | -0.493011 | 0.160209  | -1.475494 |
| O  | 1.58961   | -1.558287 | -1.530093 |
| O  | 3.605647  | 1.429861  | -1.171218 |
| O  | 2.961301  | -1.316277 | 1.095785  |
| O  | 0.669474  | 0.258419  | 0.450299  |
| O  | 0.598435  | 2.754906  | 1.476243  |
| C  | 0.709546  | 0.592815  | -0.927729 |
| C  | 1.852059  | -0.171368 | -1.593816 |
| C  | 3.178641  | 0.114363  | -0.871892 |
| C  | 3.059854  | 0.041942  | 0.664513  |
| C  | 1.798614  | 0.735392  | 1.185956  |
| C  | 1.898096  | 2.260928  | 1.201142  |
| H  | 0.707012  | -1.723588 | -1.906852 |
| H  | 4.055191  | 1.455125  | -2.023794 |
| H  | 3.827383  | -1.73911  | 1.056647  |
| H  | 0.664706  | 3.675907  | 1.75229   |
| H  | 0.834779  | 1.678234  | -1.052741 |
| H  | 1.943303  | 0.15995   | -2.637791 |
| H  | 3.914193  | -0.633952 | -1.1967   |
| H  | 3.94986   | 0.516913  | 1.094406  |
| H  | 1.616324  | 0.394794  | 2.210408  |
| H  | 2.608887  | 2.529795  | 1.992925  |
| H  | 2.28323   | 2.65908   | 0.257044  |
| O  | -0.828894 | -2.804825 | -1.023449 |
| O  | -0.994446 | -2.191244 | 1.64426   |
| O  | -1.614756 | 0.17624   | 2.216055  |
| O  | -3.860901 | 0.080212  | -0.473639 |
| O  | -2.975815 | 2.747789  | -0.917964 |
| C  | -2.082315 | -2.312013 | -0.542883 |
| C  | -1.825693 | -1.640673 | 0.813884  |
| C  | -2.105428 | -0.252322 | 1.090785  |
| C  | -2.949747 | 0.74854   | 0.359073  |
| C  | -2.085343 | 1.754651  | -0.434943 |
| C  | -1.464643 | 1.174268  | -1.706614 |
| H  | -3.028585 | 3.489708  | -0.305147 |
| H  | -0.951602 | -3.703677 | -1.346683 |
| H  | -1.014956 | -0.562816 | 2.509839  |
| H  | -4.422672 | 0.74785   | -0.892882 |
| H  | -2.511349 | -1.61164  | -1.25887  |
| H  | -2.997768 | -1.486354 | 1.269849  |
| H  | -3.471238 | 1.327905  | 1.135086  |
| H  | -1.308979 | 2.166395  | 0.224856  |
| H  | -2.242235 | 0.714365  | -2.320214 |
| H  | -1.02384  | 2.002184  | -2.273589 |
| H  | -2.769842 | -3.147431 | -0.38938  |
| Na | 0.925746  | -2.280438 | 0.577288  |

## 177. Reactant of 3rd Iso-L2 C=O Migration

46

|    |           |           |           |
|----|-----------|-----------|-----------|
| O  | -0.493011 | 0.160209  | -1.475494 |
| O  | 1.58961   | -1.558287 | -1.530093 |
| O  | 3.605647  | 1.429861  | -1.171218 |
| O  | 2.961301  | -1.316277 | 1.095785  |
| O  | 0.669474  | 0.258419  | 0.450299  |
| O  | 0.598435  | 2.754906  | 1.476243  |
| C  | 0.709546  | 0.592815  | -0.927729 |
| C  | 1.852059  | -0.171368 | -1.593816 |
| C  | 3.178641  | 0.114363  | -0.871892 |
| C  | 3.059854  | 0.041942  | 0.664513  |
| C  | 1.798614  | 0.735392  | 1.185956  |
| C  | 1.898096  | 2.260928  | 1.201142  |
| H  | 0.707012  | -1.723588 | -1.906852 |
| H  | 4.055191  | 1.455125  | -2.023794 |
| H  | 3.827383  | -1.73911  | 1.056647  |
| H  | 0.664706  | 3.675907  | 1.75229   |
| H  | 0.834779  | 1.678234  | -1.052741 |
| H  | 1.943303  | 0.15995   | -2.637791 |
| H  | 3.914193  | -0.633952 | -1.1967   |
| H  | 3.94986   | 0.516913  | 1.094406  |
| H  | 1.616324  | 0.394794  | 2.210408  |
| H  | 2.608887  | 2.529795  | 1.992925  |
| H  | 2.28323   | 2.65908   | 0.257044  |
| O  | -0.828894 | -2.804825 | -1.023449 |
| O  | -0.994446 | -2.191244 | 1.64426   |
| O  | -1.614756 | 0.17624   | 2.216055  |
| O  | -3.860901 | 0.080212  | -0.473639 |
| O  | -2.975815 | 2.747789  | -0.917964 |
| C  | -2.082315 | -2.312013 | -0.542883 |
| C  | -1.825693 | -1.640673 | 0.813884  |
| C  | -2.105428 | -0.252322 | 1.090785  |
| C  | -2.949747 | 0.74854   | 0.359073  |
| C  | -2.085343 | 1.754651  | -0.434943 |
| C  | -1.464643 | 1.174268  | -1.706614 |
| H  | -3.028585 | 3.489708  | -0.305147 |
| H  | -0.951602 | -3.703677 | -1.346683 |
| H  | -1.014956 | -0.562816 | 2.509839  |
| H  | -4.422672 | 0.74785   | -0.892882 |
| H  | -2.511349 | -1.61164  | -1.25887  |
| H  | -2.997768 | -1.486354 | 1.269849  |
| H  | -3.471238 | 1.327905  | 1.135086  |
| H  | -1.308979 | 2.166395  | 0.224856  |
| H  | -2.242235 | 0.714365  | -2.320214 |
| H  | -1.02384  | 2.002184  | -2.273589 |
| H  | -2.769842 | -3.147431 | -0.38938  |
| Na | 0.925746  | -2.280438 | 0.577288  |

## 178. Transition States of 4th Iso-L2 C=O Migration

46

|    |           |           |           |
|----|-----------|-----------|-----------|
| O  | -0.37118  | 0.3751    | -0.34013  |
| O  | -1.064817 | 0.944993  | 2.020026  |
| O  | -4.509111 | 0.727685  | 0.982889  |
| O  | -1.91616  | -1.857921 | 0.962482  |
| O  | -2.486397 | 0.620474  | -1.232992 |
| O  | -5.051197 | -0.508686 | -1.466686 |
| C  | -1.546799 | 1.147003  | -0.338063 |
| C  | -2.13197  | 1.158539  | 1.092475  |
| C  | -3.273473 | 0.131887  | 1.260092  |
| C  | -3.031601 | -1.127966 | 0.420064  |
| C  | -2.733563 | -0.77428  | -1.057527 |
| C  | -3.880887 | -1.116177 | -1.986955 |
| H  | -1.355077 | 1.236788  | 2.892902  |
| H  | -4.771252 | 0.572204  | 0.059457  |
| H  | -2.254082 | -2.594854 | 1.483052  |
| H  | -5.781194 | -0.562177 | -2.092522 |
| H  | -1.329579 | 2.15933   | -0.687094 |
| H  | -2.582656 | 2.142057  | 1.258805  |
| H  | -3.287837 | -0.171505 | 2.315911  |
| H  | -3.930822 | -1.75156  | 0.467695  |
| H  | -1.850869 | -1.349324 | -1.364562 |
| H  | -3.647054 | -0.734954 | -2.986933 |
| H  | -3.99388  | -2.207243 | -2.031597 |
| O  | 5.217047  | 0.912502  | -0.902277 |
| O  | 4.372273  | -2.381124 | -0.015968 |
| O  | 2.018337  | -1.555595 | 0.195852  |
| O  | 1.766041  | 0.807298  | 1.47954   |
| O  | 1.123347  | 2.686774  | -0.393537 |
| C  | 5.52617   | -0.328168 | -0.311818 |
| C  | 4.253141  | -1.090538 | -0.090869 |
| C  | 2.888739  | -0.620007 | -0.017019 |
| C  | 2.513514  | 0.844389  | 0.281689  |
| C  | 1.706161  | 1.482386  | -0.869533 |
| C  | 0.551671  | 0.637064  | -1.390797 |
| H  | 1.776436  | 3.396444  | -0.370817 |
| H  | 6.032382  | 1.374234  | -1.130297 |
| H  | 3.452516  | -2.696669 | 0.211831  |
| H  | 1.102132  | 1.517037  | 1.442649  |
| H  | 6.178636  | -0.945356 | -0.939709 |
| H  | 3.332028  | -0.592025 | -1.212864 |
| H  | 3.421821  | 1.438476  | 0.427334  |
| H  | 2.398553  | 1.670736  | -1.702382 |
| H  | 0.051112  | 1.169075  | -2.20696  |
| H  | 0.909712  | -0.327294 | -1.762318 |
| H  | 6.000346  | -0.211961 | 0.673799  |
| Na | 0.208775  | -0.978931 | 1.362781  |

## 179. Reactant of 4th Iso-L2 C=O Migration

46

|    |           |           |           |
|----|-----------|-----------|-----------|
| O  | -0.37118  | 0.3751    | -0.34013  |
| O  | -1.064817 | 0.944993  | 2.020026  |
| O  | -4.509111 | 0.727685  | 0.982889  |
| O  | -1.91616  | -1.857921 | 0.962482  |
| O  | -2.486397 | 0.620474  | -1.232992 |
| O  | -5.051197 | -0.508686 | -1.466686 |
| C  | -1.546799 | 1.147003  | -0.338063 |
| C  | -2.13197  | 1.158539  | 1.092475  |
| C  | -3.273473 | 0.131887  | 1.260092  |
| C  | -3.031601 | -1.127966 | 0.420064  |
| C  | -2.733563 | -0.77428  | -1.057527 |
| C  | -3.880887 | -1.116177 | -1.986955 |
| H  | -1.355077 | 1.236788  | 2.892902  |
| H  | -4.771252 | 0.572204  | 0.059457  |
| H  | -2.254082 | -2.594854 | 1.483052  |
| H  | -5.781194 | -0.562177 | -2.092522 |
| H  | -1.329579 | 2.15933   | -0.687094 |
| H  | -2.582656 | 2.142057  | 1.258805  |
| H  | -3.287837 | -0.171505 | 2.315911  |
| H  | -3.930822 | -1.75156  | 0.467695  |
| H  | -1.850869 | -1.349324 | -1.364562 |
| H  | -3.647054 | -0.734954 | -2.986933 |
| H  | -3.99388  | -2.207243 | -2.031597 |
| O  | 5.217047  | 0.912502  | -0.902277 |
| O  | 4.372273  | -2.381124 | -0.015968 |
| O  | 2.018337  | -1.555595 | 0.195852  |
| O  | 1.766041  | 0.807298  | 1.47954   |
| O  | 1.123347  | 2.686774  | -0.393537 |
| C  | 5.52617   | -0.328168 | -0.311818 |
| C  | 4.253141  | -1.090538 | -0.090869 |
| C  | 2.888739  | -0.620007 | -0.017019 |
| C  | 2.513514  | 0.844389  | 0.281689  |
| C  | 1.706161  | 1.482386  | -0.869533 |
| C  | 0.551671  | 0.637064  | -1.390797 |
| H  | 1.776436  | 3.396444  | -0.370817 |
| H  | 6.032382  | 1.374234  | -1.130297 |
| H  | 3.452516  | -2.696669 | 0.211831  |
| H  | 1.102132  | 1.517037  | 1.442649  |
| H  | 6.178636  | -0.945356 | -0.939709 |
| H  | 3.332028  | -0.592025 | -1.212864 |
| H  | 3.421821  | 1.438476  | 0.427334  |
| H  | 2.398553  | 1.670736  | -1.702382 |
| H  | 0.051112  | 1.169075  | -2.20696  |
| H  | 0.909712  | -0.327294 | -1.762318 |
| H  | 6.000346  | -0.211961 | 0.673799  |
| Na | 0.208775  | -0.978931 | 1.362781  |

## 180. Transition States of 1st Iso-L3a C-C cleavage

46

|    |           |           |           |
|----|-----------|-----------|-----------|
| O  | 0.209264  | -1.303943 | -0.535946 |
| O  | -0.454548 | 0.95771   | -1.561945 |
| O  | -3.822643 | -0.346594 | -1.738458 |
| O  | -2.364346 | 2.164958  | 0.363487  |
| O  | -1.412672 | -0.567154 | 0.821641  |
| O  | -3.212622 | -2.216628 | 2.035653  |
| C  | -1.157043 | -1.088535 | -0.46608  |
| C  | -1.439419 | -0.05908  | -1.570677 |
| C  | -2.818327 | 0.585523  | -1.38636  |
| C  | -3.113058 | 0.977927  | 0.068547  |
| C  | -2.749444 | -0.132618 | 1.061201  |
| C  | -3.73317  | -1.300218 | 1.096525  |
| H  | 0.42677   | 0.540227  | -1.50127  |
| H  | -3.956299 | -0.354592 | -2.693386 |
| H  | -2.794225 | 2.621873  | 1.096716  |
| H  | -3.846583 | -2.927519 | 2.180896  |
| H  | -1.728079 | -2.016279 | -0.620332 |
| H  | -1.425735 | -0.584985 | -2.534866 |
| H  | -2.867374 | 1.493141  | -2.000347 |
| H  | -4.185798 | 1.194163  | 0.126567  |
| H  | -2.71155  | 0.290643  | 2.071097  |
| H  | -4.709512 | -0.902462 | 1.40646   |
| H  | -3.858237 | -1.756407 | 0.109264  |
| O  | 2.166562  | 2.905459  | -0.083151 |
| O  | 0.685852  | 1.096177  | 1.214693  |
| O  | 2.555844  | 0.265791  | -1.019367 |
| O  | 4.710915  | -1.348851 | -0.066871 |
| O  | 2.497779  | -2.063054 | -1.420153 |
| C  | 2.660121  | 2.318316  | 1.115746  |
| C  | 2.077651  | 0.905177  | 1.302803  |
| C  | 2.735544  | 0.022965  | 0.252247  |
| C  | 3.685624  | -0.899414 | 0.679437  |
| C  | 2.241886  | -2.36895  | -0.198884 |
| C  | 0.796259  | -2.319562 | 0.244041  |
| H  | 2.395872  | -0.931149 | -1.496059 |
| H  | 2.548706  | 2.422928  | -0.833359 |
| H  | 0.156545  | 0.281309  | 1.244484  |
| H  | 4.584342  | -1.11218  | -0.998309 |
| H  | 3.754555  | 2.296375  | 1.122982  |
| H  | 2.363786  | 0.539142  | 2.298111  |
| H  | 3.810598  | -1.112057 | 1.735907  |
| H  | 2.894085  | -3.09787  | 0.287802  |
| H  | 0.34438   | -3.297856 | 0.013023  |
| H  | 0.690678  | -2.135137 | 1.319481  |
| H  | 2.31513   | 2.952133  | 1.936372  |
| Na | -0.163352 | 2.6724    | -0.139926 |



181. Reactant of 1st Iso-L3a C-C cleavage

46

|    |           |           |           |
|----|-----------|-----------|-----------|
| O  | 0.209264  | -1.303943 | -0.535946 |
| O  | -0.454548 | 0.95771   | -1.561945 |
| O  | -3.822643 | -0.346594 | -1.738458 |
| O  | -2.364346 | 2.164958  | 0.363487  |
| O  | -1.412672 | -0.567154 | 0.821641  |
| O  | -3.212622 | -2.216628 | 2.035653  |
| C  | -1.157043 | -1.088535 | -0.46608  |
| C  | -1.439419 | -0.05908  | -1.570677 |
| C  | -2.818327 | 0.585523  | -1.38636  |
| C  | -3.113058 | 0.977927  | 0.068547  |
| C  | -2.749444 | -0.132618 | 1.061201  |
| C  | -3.73317  | -1.300218 | 1.096525  |
| H  | 0.42677   | 0.540227  | -1.50127  |
| H  | -3.956299 | -0.354592 | -2.693386 |
| H  | -2.794225 | 2.621873  | 1.096716  |
| H  | -3.846583 | -2.927519 | 2.180896  |
| H  | -1.728079 | -2.016279 | -0.620332 |
| H  | -1.425735 | -0.584985 | -2.534866 |
| H  | -2.867374 | 1.493141  | -2.000347 |
| H  | -4.185798 | 1.194163  | 0.126567  |
| H  | -2.71155  | 0.290643  | 2.071097  |
| H  | -4.709512 | -0.902462 | 1.40646   |
| H  | -3.858237 | -1.756407 | 0.109264  |
| O  | 2.166562  | 2.905459  | -0.083151 |
| O  | 0.685852  | 1.096177  | 1.214693  |
| O  | 2.555844  | 0.265791  | -1.019367 |
| O  | 4.710915  | -1.348851 | -0.066871 |
| O  | 2.497779  | -2.063054 | -1.420153 |
| C  | 2.660121  | 2.318316  | 1.115746  |
| C  | 2.077651  | 0.905177  | 1.302803  |
| C  | 2.735544  | 0.022965  | 0.252247  |
| C  | 3.685624  | -0.899414 | 0.679437  |
| C  | 2.241886  | -2.36895  | -0.198884 |
| C  | 0.796259  | -2.319562 | 0.244041  |
| H  | 2.395872  | -0.931149 | -1.496059 |
| H  | 2.548706  | 2.422928  | -0.833359 |
| H  | 0.156545  | 0.281309  | 1.244484  |
| H  | 4.584342  | -1.11218  | -0.998309 |
| H  | 3.754555  | 2.296375  | 1.122982  |
| H  | 2.363786  | 0.539142  | 2.298111  |
| H  | 3.810598  | -1.112057 | 1.735907  |
| H  | 2.894085  | -3.09787  | 0.287802  |
| H  | 0.34438   | -3.297856 | 0.013023  |
| H  | 0.690678  | -2.135137 | 1.319481  |
| H  | 2.31513   | 2.952133  | 1.936372  |
| Na | -0.163352 | 2.6724    | -0.139926 |

## 182. Transition States of 2nd Iso-L3a C-C cleavage

46

|    |           |           |           |
|----|-----------|-----------|-----------|
| O  | 0.714907  | -1.172058 | -1.236341 |
| O  | 2.592148  | -2.109696 | 0.451993  |
| O  | 4.468604  | 0.616     | -1.144801 |
| O  | 3.435211  | -0.177671 | 2.17981   |
| O  | 1.32455   | 0.422303  | 0.24612   |
| O  | 1.025867  | 3.003005  | -0.4176   |
| C  | 1.744612  | -0.301332 | -0.895148 |
| C  | 2.959508  | -1.15294  | -0.5368   |
| C  | 4.08775   | -0.217005 | -0.06811  |
| C  | 3.599046  | 0.694723  | 1.067035  |
| C  | 2.265519  | 1.378921  | 0.731643  |
| C  | 2.366499  | 2.581648  | -0.202351 |
| H  | 2.764691  | -1.720046 | 1.328094  |
| H  | 5.235472  | 0.254091  | -1.602641 |
| H  | 3.300545  | 0.314898  | 2.998234  |
| H  | 1.004224  | 3.846658  | -0.883774 |
| H  | 1.970583  | 0.382551  | -1.725279 |
| H  | 3.288884  | -1.703582 | -1.423758 |
| H  | 4.924871  | -0.811906 | 0.313782  |
| H  | 4.372637  | 1.446812  | 1.263783  |
| H  | 1.816857  | 1.735402  | 1.666928  |
| H  | 2.951871  | 3.361734  | 0.299189  |
| H  | 2.859444  | 2.334054  | -1.146679 |
| O  | -4.659932 | -0.031014 | -1.40517  |
| O  | -5.252657 | 0.297529  | 1.282939  |
| O  | -3.03643  | -1.085663 | 1.467162  |
| O  | -1.487184 | 1.726691  | -0.091611 |
| O  | -1.583905 | -2.111703 | -0.228308 |
| C  | -4.431497 | 1.19294   | -0.740411 |
| C  | -4.124842 | 0.93871   | 0.740995  |
| C  | -2.875543 | 0.104909  | 0.923562  |
| C  | -1.624565 | 0.501271  | 0.488745  |
| C  | -1.678553 | -1.038414 | -0.938688 |
| C  | -0.479795 | -0.595964 | -1.757668 |
| H  | -2.448924 | -1.75082  | 0.922726  |
| H  | -5.4261   | -0.449404 | -0.989112 |
| H  | -4.97678  | -0.467513 | 1.806221  |
| H  | -0.556609 | 2.018782  | -0.084361 |
| H  | -3.591191 | 1.686996  | -1.231263 |
| H  | -3.94799  | 1.906805  | 1.234363  |
| H  | -0.738235 | 0.04893   | 0.919494  |
| H  | -2.638977 | -0.811614 | -1.418692 |
| H  | -0.622314 | -0.987319 | -2.772716 |
| H  | -0.412607 | 0.495655  | -1.812622 |
| H  | -5.31057  | 1.845842  | -0.79224  |
| Na | 0.454723  | -2.956691 | 0.129086  |

183. Reactant of 2nd Iso-L3a C-C cleavage

46

|    |           |           |           |
|----|-----------|-----------|-----------|
| O  | 0.714907  | -1.172058 | -1.236341 |
| O  | 2.592148  | -2.109696 | 0.451993  |
| O  | 4.468604  | 0.616     | -1.144801 |
| O  | 3.435211  | -0.177671 | 2.17981   |
| O  | 1.32455   | 0.422303  | 0.24612   |
| O  | 1.025867  | 3.003005  | -0.4176   |
| C  | 1.744612  | -0.301332 | -0.895148 |
| C  | 2.959508  | -1.15294  | -0.5368   |
| C  | 4.08775   | -0.217005 | -0.06811  |
| C  | 3.599046  | 0.694723  | 1.067035  |
| C  | 2.265519  | 1.378921  | 0.731643  |
| C  | 2.366499  | 2.581648  | -0.202351 |
| H  | 2.764691  | -1.720046 | 1.328094  |
| H  | 5.235472  | 0.254091  | -1.602641 |
| H  | 3.300545  | 0.314898  | 2.998234  |
| H  | 1.004224  | 3.846658  | -0.883774 |
| H  | 1.970583  | 0.382551  | -1.725279 |
| H  | 3.288884  | -1.703582 | -1.423758 |
| H  | 4.924871  | -0.811906 | 0.313782  |
| H  | 4.372637  | 1.446812  | 1.263783  |
| H  | 1.816857  | 1.735402  | 1.666928  |
| H  | 2.951871  | 3.361734  | 0.299189  |
| H  | 2.859444  | 2.334054  | -1.146679 |
| O  | -4.659932 | -0.031014 | -1.40517  |
| O  | -5.252657 | 0.297529  | 1.282939  |
| O  | -3.03643  | -1.085663 | 1.467162  |
| O  | -1.487184 | 1.726691  | -0.091611 |
| O  | -1.583905 | -2.111703 | -0.228308 |
| C  | -4.431497 | 1.19294   | -0.740411 |
| C  | -4.124842 | 0.93871   | 0.740995  |
| C  | -2.875543 | 0.104909  | 0.923562  |
| C  | -1.624565 | 0.501271  | 0.488745  |
| C  | -1.678553 | -1.038414 | -0.938688 |
| C  | -0.479795 | -0.595964 | -1.757668 |
| H  | -2.448924 | -1.75082  | 0.922726  |
| H  | -5.4261   | -0.449404 | -0.989112 |
| H  | -4.97678  | -0.467513 | 1.806221  |
| H  | -0.556609 | 2.018782  | -0.084361 |
| H  | -3.591191 | 1.686996  | -1.231263 |
| H  | -3.94799  | 1.906805  | 1.234363  |
| H  | -0.738235 | 0.04893   | 0.919494  |
| H  | -2.638977 | -0.811614 | -1.418692 |
| H  | -0.622314 | -0.987319 | -2.772716 |
| H  | -0.412607 | 0.495655  | -1.812622 |
| H  | -5.31057  | 1.845842  | -0.79224  |
| Na | 0.454723  | -2.956691 | 0.129086  |

## 184. Transition States of 3rd Iso-L3a C-C cleavage

46

|    |           |           |           |
|----|-----------|-----------|-----------|
| O  | 1.243193  | 1.54393   | 1.341454  |
| O  | 3.271915  | 1.892275  | -0.209743 |
| O  | 4.389524  | -1.431281 | 0.700488  |
| O  | 2.773499  | -0.065035 | -2.245826 |
| O  | 1.166851  | -0.200318 | -0.077443 |
| O  | 0.354862  | -2.60945  | 0.806276  |
| C  | 1.873696  | 0.349693  | 1.024589  |
| C  | 3.307823  | 0.731875  | 0.616391  |
| C  | 4.004598  | -0.389819 | -0.17303  |
| C  | 3.079817  | -1.020605 | -1.22674  |
| C  | 1.723515  | -1.393508 | -0.636863 |
| C  | 1.692153  | -2.557925 | 0.347384  |
| H  | 3.13306   | 2.656373  | 0.366007  |
| H  | 5.259951  | -1.258145 | 1.076928  |
| H  | 3.543411  | 0.074026  | -2.810391 |
| H  | 0.228877  | -3.369815 | 1.384656  |
| H  | 1.856764  | -0.357771 | 1.866494  |
| H  | 3.891228  | 0.931827  | 1.522993  |
| H  | 4.870389  | 0.054202  | -0.681542 |
| H  | 3.572539  | -1.903789 | -1.648681 |
| H  | 1.046457  | -1.639057 | -1.4615   |
| H  | 1.976546  | -3.467279 | -0.198267 |
| H  | 2.396159  | -2.426349 | 1.173243  |
| O  | -5.095708 | -1.524947 | -1.07819  |
| O  | -4.740826 | -0.046824 | 1.086543  |
| O  | -2.227504 | 0.339975  | -1.47457  |
| O  | -2.269769 | -0.494419 | 2.024999  |
| O  | -0.764026 | 1.951701  | -0.471363 |
| C  | -5.039195 | -0.12566  | -1.304193 |
| C  | -4.216588 | 0.421378  | -0.141275 |
| C  | -2.748714 | 0.073657  | -0.301003 |
| C  | -1.889484 | -0.268156 | 0.738652  |
| C  | -1.144916 | 1.626721  | 0.721765  |
| C  | -0.087112 | 1.47061   | 1.830244  |
| H  | -1.494    | 1.097509  | -1.262057 |
| H  | -5.698961 | -1.946014 | -1.699763 |
| H  | -5.11845  | -0.925457 | 0.91277   |
| H  | -3.225438 | -0.322623 | 2.110045  |
| H  | -4.550998 | 0.119579  | -2.251733 |
| H  | -4.290972 | 1.519048  | -0.144894 |
| H  | -0.942182 | -0.734867 | 0.481685  |
| H  | -2.054715 | 2.106888  | 1.113526  |
| H  | -0.198096 | 2.336552  | 2.489794  |
| H  | -0.250309 | 0.567333  | 2.427685  |
| H  | -6.038898 | 0.321852  | -1.268018 |
| Na | 1.26709   | 1.655597  | -1.426863 |

## 185. Reactant of 3rd Iso-L3a C-C cleavage

46

|    |           |           |           |
|----|-----------|-----------|-----------|
| O  | 1.243193  | 1.54393   | 1.341454  |
| O  | 3.271915  | 1.892275  | -0.209743 |
| O  | 4.389524  | -1.431281 | 0.700488  |
| O  | 2.773499  | -0.065035 | -2.245826 |
| O  | 1.166851  | -0.200318 | -0.077443 |
| O  | 0.354862  | -2.60945  | 0.806276  |
| C  | 1.873696  | 0.349693  | 1.024589  |
| C  | 3.307823  | 0.731875  | 0.616391  |
| C  | 4.004598  | -0.389819 | -0.17303  |
| C  | 3.079817  | -1.020605 | -1.22674  |
| C  | 1.723515  | -1.393508 | -0.636863 |
| C  | 1.692153  | -2.557925 | 0.347384  |
| H  | 3.13306   | 2.656373  | 0.366007  |
| H  | 5.259951  | -1.258145 | 1.076928  |
| H  | 3.543411  | 0.074026  | -2.810391 |
| H  | 0.228877  | -3.369815 | 1.384656  |
| H  | 1.856764  | -0.357771 | 1.866494  |
| H  | 3.891228  | 0.931827  | 1.522993  |
| H  | 4.870389  | 0.054202  | -0.681542 |
| H  | 3.572539  | -1.903789 | -1.648681 |
| H  | 1.046457  | -1.639057 | -1.4615   |
| H  | 1.976546  | -3.467279 | -0.198267 |
| H  | 2.396159  | -2.426349 | 1.173243  |
| O  | -5.095708 | -1.524947 | -1.07819  |
| O  | -4.740826 | -0.046824 | 1.086543  |
| O  | -2.227504 | 0.339975  | -1.47457  |
| O  | -2.269769 | -0.494419 | 2.024999  |
| O  | -0.764026 | 1.951701  | -0.471363 |
| C  | -5.039195 | -0.12566  | -1.304193 |
| C  | -4.216588 | 0.421378  | -0.141275 |
| C  | -2.748714 | 0.073657  | -0.301003 |
| C  | -1.889484 | -0.268156 | 0.738652  |
| C  | -1.144916 | 1.626721  | 0.721765  |
| C  | -0.087112 | 1.47061   | 1.830244  |
| H  | -1.494    | 1.097509  | -1.262057 |
| H  | -5.698961 | -1.946014 | -1.699763 |
| H  | -5.11845  | -0.925457 | 0.91277   |
| H  | -3.225438 | -0.322623 | 2.110045  |
| H  | -4.550998 | 0.119579  | -2.251733 |
| H  | -4.290972 | 1.519048  | -0.144894 |
| H  | -0.942182 | -0.734867 | 0.481685  |
| H  | -2.054715 | 2.106888  | 1.113526  |
| H  | -0.198096 | 2.336552  | 2.489794  |
| H  | -0.250309 | 0.567333  | 2.427685  |
| H  | -6.038898 | 0.321852  | -1.268018 |
| Na | 1.26709   | 1.655597  | -1.426863 |

## 186. Transition States of 4th Iso-L3a C-C cleavage

46

|    |           |           |           |
|----|-----------|-----------|-----------|
| O  | -0.243948 | -1.848731 | 0.910998  |
| O  | -1.644748 | -1.936639 | -1.339066 |
| O  | -4.271894 | -0.472969 | 0.704972  |
| O  | -2.300365 | 0.824394  | -2.040851 |
| O  | -0.852903 | 0.220355  | 0.290302  |
| O  | -1.145397 | 1.814308  | 2.389567  |
| C  | -1.327845 | -0.990831 | 0.844874  |
| C  | -2.323933 | -1.611142 | -0.132732 |
| C  | -3.448733 | -0.607198 | -0.437145 |
| C  | -2.923867 | 0.80662   | -0.755852 |
| C  | -1.83353  | 1.254392  | 0.219278  |
| C  | -2.316734 | 1.684932  | 1.602684  |
| H  | -1.086839 | -2.706397 | -1.155215 |
| H  | -4.9325   | -1.174683 | 0.735547  |
| H  | -2.965475 | 0.72475   | -2.732669 |
| H  | -1.36504  | 2.242158  | 3.224647  |
| H  | -1.774741 | -0.809959 | 1.832747  |
| H  | -2.7687   | -2.510813 | 0.310406  |
| H  | -4.013597 | -0.973816 | -1.304707 |
| H  | -3.770866 | 1.502268  | -0.724848 |
| H  | -1.297811 | 2.095781  | -0.230181 |
| H  | -2.8402   | 2.642585  | 1.487665  |
| H  | -3.017272 | 0.967219  | 2.040784  |
| O  | 2.144194  | 3.640889  | -0.031761 |
| O  | 1.004036  | 1.641114  | -1.257859 |
| O  | 1.976738  | -0.798168 | -1.335558 |
| O  | 4.427317  | -1.386163 | -0.008889 |
| O  | 2.054666  | -2.652222 | 0.119569  |
| C  | 2.871506  | 2.425932  | 0.011878  |
| C  | 1.811221  | 1.330804  | -0.131298 |
| C  | 2.452399  | -0.031333 | -0.39251  |
| C  | 3.542151  | -0.439881 | 0.364989  |
| C  | 2.106471  | -1.934275 | 1.185496  |
| C  | 0.794006  | -1.478602 | 1.801002  |
| H  | 1.845447  | -1.924659 | -0.733055 |
| H  | 2.743437  | 4.393962  | -0.077973 |
| H  | 0.935248  | 2.608538  | -1.285471 |
| H  | 4.087947  | -1.890601 | -0.76318  |
| H  | 3.58657   | 2.358883  | -0.818002 |
| H  | 1.181295  | 1.323402  | 0.770543  |
| H  | 3.910828  | 0.170492  | 1.181928  |
| H  | 2.939006  | -2.11527  | 1.869191  |
| H  | 0.672533  | -2.017985 | 2.751534  |
| H  | 0.773446  | -0.402815 | 2.012338  |
| H  | 3.406375  | 2.320003  | 0.962179  |
| Na | -0.168121 | -0.149899 | -1.968145 |

187. Reactant of 4th Iso-L3a C-C cleavage

46

|    |           |           |           |
|----|-----------|-----------|-----------|
| O  | -0.243948 | -1.848731 | 0.910998  |
| O  | -1.644748 | -1.936639 | -1.339066 |
| O  | -4.271894 | -0.472969 | 0.704972  |
| O  | -2.300365 | 0.824394  | -2.040851 |
| O  | -0.852903 | 0.220355  | 0.290302  |
| O  | -1.145397 | 1.814308  | 2.389567  |
| C  | -1.327845 | -0.990831 | 0.844874  |
| C  | -2.323933 | -1.611142 | -0.132732 |
| C  | -3.448733 | -0.607198 | -0.437145 |
| C  | -2.923867 | 0.80662   | -0.755852 |
| C  | -1.83353  | 1.254392  | 0.219278  |
| C  | -2.316734 | 1.684932  | 1.602684  |
| H  | -1.086839 | -2.706397 | -1.155215 |
| H  | -4.9325   | -1.174683 | 0.735547  |
| H  | -2.965475 | 0.72475   | -2.732669 |
| H  | -1.36504  | 2.242158  | 3.224647  |
| H  | -1.774741 | -0.809959 | 1.832747  |
| H  | -2.7687   | -2.510813 | 0.310406  |
| H  | -4.013597 | -0.973816 | -1.304707 |
| H  | -3.770866 | 1.502268  | -0.724848 |
| H  | -1.297811 | 2.095781  | -0.230181 |
| H  | -2.8402   | 2.642585  | 1.487665  |
| H  | -3.017272 | 0.967219  | 2.040784  |
| O  | 2.144194  | 3.640889  | -0.031761 |
| O  | 1.004036  | 1.641114  | -1.257859 |
| O  | 1.976738  | -0.798168 | -1.335558 |
| O  | 4.427317  | -1.386163 | -0.008889 |
| O  | 2.054666  | -2.652222 | 0.119569  |
| C  | 2.871506  | 2.425932  | 0.011878  |
| C  | 1.811221  | 1.330804  | -0.131298 |
| C  | 2.452399  | -0.031333 | -0.39251  |
| C  | 3.542151  | -0.439881 | 0.364989  |
| C  | 2.106471  | -1.934275 | 1.185496  |
| C  | 0.794006  | -1.478602 | 1.801002  |
| H  | 1.845447  | -1.924659 | -0.733055 |
| H  | 2.743437  | 4.393962  | -0.077973 |
| H  | 0.935248  | 2.608538  | -1.285471 |
| H  | 4.087947  | -1.890601 | -0.76318  |
| H  | 3.58657   | 2.358883  | -0.818002 |
| H  | 1.181295  | 1.323402  | 0.770543  |
| H  | 3.910828  | 0.170492  | 1.181928  |
| H  | 2.939006  | -2.11527  | 1.869191  |
| H  | 0.672533  | -2.017985 | 2.751534  |
| H  | 0.773446  | -0.402815 | 2.012338  |
| H  | 3.406375  | 2.320003  | 0.962179  |
| Na | -0.168121 | -0.149899 | -1.968145 |

## 188. Transition States of 1st Iso-L3a C=O Migration

46

|    |           |           |           |
|----|-----------|-----------|-----------|
| O  | -0.201477 | 0.126005  | 1.45919   |
| O  | -1.581475 | -2.070033 | 0.900288  |
| O  | -4.471478 | 0.037075  | 1.506893  |
| O  | -3.12647  | -1.495501 | -1.492249 |
| O  | -1.515112 | 0.525469  | -0.355002 |
| O  | -4.520912 | 2.283179  | -1.339333 |
| C  | -1.511596 | 0.329958  | 1.057613  |
| C  | -2.279694 | -0.943825 | 1.410736  |
| C  | -3.690444 | -0.909331 | 0.802734  |
| C  | -3.690741 | -0.46618  | -0.670692 |
| C  | -2.817078 | 0.762063  | -0.90991  |
| C  | -3.431634 | 2.087738  | -0.461546 |
| H  | -0.749334 | -2.140848 | 1.390201  |
| H  | -4.875465 | -0.365565 | 2.28406   |
| H  | -3.772184 | -2.196412 | -1.639196 |
| H  | -5.059549 | 3.024462  | -1.0427   |
| H  | -1.947072 | 1.211343  | 1.551176  |
| H  | -2.370734 | -1.012178 | 2.502129  |
| H  | -4.116135 | -1.919253 | 0.866652  |
| H  | -4.715899 | -0.235901 | -0.976765 |
| H  | -2.657418 | 0.842579  | -1.989818 |
| H  | -3.765407 | 2.055531  | 0.57982   |
| H  | -2.665996 | 2.867317  | -0.578498 |
| O  | 4.818588  | 1.163763  | -1.267006 |
| O  | 4.140852  | 0.715028  | 1.608571  |
| O  | 3.644241  | -2.045268 | -0.586147 |
| O  | 1.279093  | -1.30988  | -0.90107  |
| O  | 2.479783  | 1.98382   | -0.071712 |
| C  | 5.52482   | 0.297071  | -0.384645 |
| C  | 4.541813  | -0.227465 | 0.664375  |
| C  | 3.381708  | -0.880903 | -0.062658 |
| C  | 2.004684  | -0.470535 | -0.216495 |
| C  | 1.490648  | 0.981348  | -0.077378 |
| C  | 0.701863  | 1.196237  | 1.216704  |
| H  | 3.054527  | 1.912685  | -0.851963 |
| H  | 5.429999  | 1.556905  | -1.900474 |
| H  | 3.727529  | 1.472683  | 1.155585  |
| H  | 2.817816  | -2.284968 | -1.086655 |
| H  | 5.949716  | -0.548994 | -0.936121 |
| H  | 5.052735  | -1.029329 | 1.209252  |
| H  | 2.25584   | -0.884615 | 0.957683  |
| H  | 0.825601  | 1.091933  | -0.94046  |
| H  | 1.403527  | 1.21698   | 2.056443  |
| H  | 0.17293   | 2.154427  | 1.166911  |
| H  | 6.318628  | 0.831642  | 0.146979  |
| Na | -0.83862  | -1.587885 | -1.257878 |



## 189. Reactant of 1st Iso-L3a C=O Migration

46

|    |           |           |           |
|----|-----------|-----------|-----------|
| O  | -0.201477 | 0.126005  | 1.45919   |
| O  | -1.581475 | -2.070033 | 0.900288  |
| O  | -4.471478 | 0.037075  | 1.506893  |
| O  | -3.12647  | -1.495501 | -1.492249 |
| O  | -1.515112 | 0.525469  | -0.355002 |
| O  | -4.520912 | 2.283179  | -1.339333 |
| C  | -1.511596 | 0.329958  | 1.057613  |
| C  | -2.279694 | -0.943825 | 1.410736  |
| C  | -3.690444 | -0.909331 | 0.802734  |
| C  | -3.690741 | -0.46618  | -0.670692 |
| C  | -2.817078 | 0.762063  | -0.90991  |
| C  | -3.431634 | 2.087738  | -0.461546 |
| H  | -0.749334 | -2.140848 | 1.390201  |
| H  | -4.875465 | -0.365565 | 2.28406   |
| H  | -3.772184 | -2.196412 | -1.639196 |
| H  | -5.059549 | 3.024462  | -1.0427   |
| H  | -1.947072 | 1.211343  | 1.551176  |
| H  | -2.370734 | -1.012178 | 2.502129  |
| H  | -4.116135 | -1.919253 | 0.866652  |
| H  | -4.715899 | -0.235901 | -0.976765 |
| H  | -2.657418 | 0.842579  | -1.989818 |
| H  | -3.765407 | 2.055531  | 0.57982   |
| H  | -2.665996 | 2.867317  | -0.578498 |
| O  | 4.818588  | 1.163763  | -1.267006 |
| O  | 4.140852  | 0.715028  | 1.608571  |
| O  | 3.644241  | -2.045268 | -0.586147 |
| O  | 1.279093  | -1.30988  | -0.90107  |
| O  | 2.479783  | 1.98382   | -0.071712 |
| C  | 5.52482   | 0.297071  | -0.384645 |
| C  | 4.541813  | -0.227465 | 0.664375  |
| C  | 3.381708  | -0.880903 | -0.062658 |
| C  | 2.004684  | -0.470535 | -0.216495 |
| C  | 1.490648  | 0.981348  | -0.077378 |
| C  | 0.701863  | 1.196237  | 1.216704  |
| H  | 3.054527  | 1.912685  | -0.851963 |
| H  | 5.429999  | 1.556905  | -1.900474 |
| H  | 3.727529  | 1.472683  | 1.155585  |
| H  | 2.817816  | -2.284968 | -1.086655 |
| H  | 5.949716  | -0.548994 | -0.936121 |
| H  | 5.052735  | -1.029329 | 1.209252  |
| H  | 2.25584   | -0.884615 | 0.957683  |
| H  | 0.825601  | 1.091933  | -0.94046  |
| H  | 1.403527  | 1.21698   | 2.056443  |
| H  | 0.17293   | 2.154427  | 1.166911  |
| H  | 6.318628  | 0.831642  | 0.146979  |
| Na | -0.83862  | -1.587885 | -1.257878 |

## 190. Transition States of 2nd Iso-L3a C=O Migration

46

|    |           |           |           |
|----|-----------|-----------|-----------|
| O  | 0.219062  | 0.184664  | -1.358233 |
| O  | 1.716214  | -1.98296  | -1.141438 |
| O  | 4.412479  | 0.359316  | -1.422851 |
| O  | 3.060887  | -1.682419 | 1.321952  |
| O  | 1.531846  | 0.496835  | 0.465617  |
| O  | 4.845145  | 1.891334  | 1.007676  |
| C  | 1.526351  | 0.422     | -0.966768 |
| C  | 2.363724  | -0.758595 | -1.463265 |
| C  | 3.755999  | -0.736462 | -0.824909 |
| C  | 3.686765  | -0.558008 | 0.698399  |
| C  | 2.82168   | 0.64175   | 1.0776    |
| C  | 3.44813   | 2.015096  | 0.787919  |
| H  | 1.000529  | -2.112421 | -1.777551 |
| H  | 5.122864  | 0.685938  | -0.850538 |
| H  | 3.635458  | -2.455003 | 1.256763  |
| H  | 5.243407  | 2.761979  | 1.119934  |
| H  | 1.900169  | 1.363433  | -1.388088 |
| H  | 2.49277   | -0.662221 | -2.546942 |
| H  | 4.256738  | -1.686475 | -1.06253  |
| H  | 4.69275   | -0.416381 | 1.106234  |
| H  | 2.628445  | 0.56302   | 2.151623  |
| H  | 3.255467  | 2.324438  | -0.243145 |
| H  | 3.002351  | 2.751429  | 1.464508  |
| O  | -4.874693 | 1.130806  | 1.296324  |
| O  | -4.143046 | 0.821315  | -1.581339 |
| O  | -3.729658 | -2.056725 | 0.476442  |
| O  | -1.36325  | -1.375228 | 0.871944  |
| O  | -2.495964 | 1.973919  | 0.19998   |
| C  | -5.574533 | 0.319444  | 0.357956  |
| C  | -4.577477 | -0.164002 | -0.697234 |
| C  | -3.441759 | -0.871837 | 0.016868  |
| C  | -2.061873 | -0.491456 | 0.216364  |
| C  | -1.522724 | 0.956681  | 0.164282  |
| C  | -0.709485 | 1.230919  | -1.102019 |
| H  | -3.091986 | 1.861355  | 0.959287  |
| H  | -5.49283  | 1.498725  | 1.938319  |
| H  | -3.731547 | 1.549034  | -1.080547 |
| H  | -2.914905 | -2.331692 | 0.979312  |
| H  | -6.020353 | -0.547867 | 0.857438  |
| H  | -5.088207 | -0.927701 | -1.294589 |
| H  | -2.297242 | -0.841573 | -0.981871 |
| H  | -0.869155 | 1.006723  | 1.042186  |
| H  | -1.39101  | 1.273693  | -1.957629 |
| H  | -0.198729 | 2.194948  | -1.002778 |
| H  | -6.351224 | 0.890918  | -0.160382 |
| Na | 0.772297  | -1.714939 | 0.98102   |

## 191. Reactant of 2nd Iso-L3a C=O Migration

46

|    |           |           |           |
|----|-----------|-----------|-----------|
| O  | 0.219062  | 0.184664  | -1.358233 |
| O  | 1.716214  | -1.98296  | -1.141438 |
| O  | 4.412479  | 0.359316  | -1.422851 |
| O  | 3.060887  | -1.682419 | 1.321952  |
| O  | 1.531846  | 0.496835  | 0.465617  |
| O  | 4.845145  | 1.891334  | 1.007676  |
| C  | 1.526351  | 0.422     | -0.966768 |
| C  | 2.363724  | -0.758595 | -1.463265 |
| C  | 3.755999  | -0.736462 | -0.824909 |
| C  | 3.686765  | -0.558008 | 0.698399  |
| C  | 2.82168   | 0.64175   | 1.0776    |
| C  | 3.44813   | 2.015096  | 0.787919  |
| H  | 1.000529  | -2.112421 | -1.777551 |
| H  | 5.122864  | 0.685938  | -0.850538 |
| H  | 3.635458  | -2.455003 | 1.256763  |
| H  | 5.243407  | 2.761979  | 1.119934  |
| H  | 1.900169  | 1.363433  | -1.388088 |
| H  | 2.49277   | -0.662221 | -2.546942 |
| H  | 4.256738  | -1.686475 | -1.06253  |
| H  | 4.69275   | -0.416381 | 1.106234  |
| H  | 2.628445  | 0.56302   | 2.151623  |
| H  | 3.255467  | 2.324438  | -0.243145 |
| H  | 3.002351  | 2.751429  | 1.464508  |
| O  | -4.874693 | 1.130806  | 1.296324  |
| O  | -4.143046 | 0.821315  | -1.581339 |
| O  | -3.729658 | -2.056725 | 0.476442  |
| O  | -1.36325  | -1.375228 | 0.871944  |
| O  | -2.495964 | 1.973919  | 0.19998   |
| C  | -5.574533 | 0.319444  | 0.357956  |
| C  | -4.577477 | -0.164002 | -0.697234 |
| C  | -3.441759 | -0.871837 | 0.016868  |
| C  | -2.061873 | -0.491456 | 0.216364  |
| C  | -1.522724 | 0.956681  | 0.164282  |
| C  | -0.709485 | 1.230919  | -1.102019 |
| H  | -3.091986 | 1.861355  | 0.959287  |
| H  | -5.49283  | 1.498725  | 1.938319  |
| H  | -3.731547 | 1.549034  | -1.080547 |
| H  | -2.914905 | -2.331692 | 0.979312  |
| H  | -6.020353 | -0.547867 | 0.857438  |
| H  | -5.088207 | -0.927701 | -1.294589 |
| H  | -2.297242 | -0.841573 | -0.981871 |
| H  | -0.869155 | 1.006723  | 1.042186  |
| H  | -1.39101  | 1.273693  | -1.957629 |
| H  | -0.198729 | 2.194948  | -1.002778 |
| H  | -6.351224 | 0.890918  | -0.160382 |
| Na | 0.772297  | -1.714939 | 0.98102   |

## 192. Transition States of 3rd Iso-L3a C=O Migration

46

|    |           |           |           |
|----|-----------|-----------|-----------|
| O  | -0.333796 | 0.222222  | 1.406208  |
| O  | -1.765347 | -1.994672 | 1.008834  |
| O  | -4.635447 | 0.201451  | 1.312841  |
| O  | -3.226927 | -1.564024 | -1.518445 |
| O  | -1.577045 | 0.427432  | -0.484352 |
| O  | -2.29402  | 2.977941  | -0.80854  |
| C  | -1.624099 | 0.404692  | 0.93726   |
| C  | -2.44346  | -0.803946 | 1.386022  |
| C  | -3.829199 | -0.795881 | 0.718191  |
| C  | -3.774345 | -0.463266 | -0.786942 |
| C  | -2.842872 | 0.711025  | -1.087864 |
| C  | -3.386777 | 2.087234  | -0.703816 |
| H  | -0.945355 | -2.035406 | 1.522645  |
| H  | -5.036528 | -0.124283 | 2.126944  |
| H  | -3.867236 | -2.284068 | -1.564325 |
| H  | -2.608272 | 3.885297  | -0.72731  |
| H  | -2.048586 | 1.350347  | 1.302488  |
| H  | -2.580127 | -0.76953  | 2.474421  |
| H  | -4.268137 | -1.795831 | 0.836396  |
| H  | -4.792442 | -0.239959 | -1.12681  |
| H  | -2.633363 | 0.718802  | -2.16193  |
| H  | -4.186462 | 2.330444  | -1.416021 |
| H  | -3.819749 | 2.095424  | 0.301338  |
| O  | 4.768342  | 0.90967   | -1.283542 |
| O  | 4.017618  | 0.770509  | 1.604587  |
| O  | 3.515369  | -2.188204 | -0.314811 |
| O  | 1.178776  | -1.454301 | -0.765493 |
| O  | 2.415975  | 1.887458  | -0.223897 |
| C  | 5.43569   | 0.124065  | -0.301058 |
| C  | 4.418571  | -0.271219 | 0.771676  |
| C  | 3.262957  | -0.972875 | 0.084117  |
| C  | 1.898532  | -0.558201 | -0.148481 |
| C  | 1.405039  | 0.90711   | -0.167089 |
| C  | 0.582045  | 1.261015  | 1.073797  |
| H  | 2.99575   | 1.745647  | -0.989788 |
| H  | 5.40137   | 1.2163    | -1.942884 |
| H  | 3.615397  | 1.477756  | 1.06668   |
| H  | 2.693199  | -2.460328 | -0.807314 |
| H  | 5.853784  | -0.78259  | -0.753054 |
| H  | 4.899272  | -1.023645 | 1.407405  |
| H  | 2.111641  | -0.857515 | 1.067661  |
| H  | 0.767654  | 0.950537  | -1.056576 |
| H  | 1.260724  | 1.370324  | 1.925777  |
| H  | 0.05338   | 2.204249  | 0.898378  |
| H  | 6.229535  | 0.693904  | 0.192852  |
| Na | -0.928719 | -1.728022 | -1.15445  |

## 193. Reactant of 3rd Iso-L3a C=O Migration

46

|    |           |           |           |
|----|-----------|-----------|-----------|
| O  | -0.333796 | 0.222222  | 1.406208  |
| O  | -1.765347 | -1.994672 | 1.008834  |
| O  | -4.635447 | 0.201451  | 1.312841  |
| O  | -3.226927 | -1.564024 | -1.518445 |
| O  | -1.577045 | 0.427432  | -0.484352 |
| O  | -2.29402  | 2.977941  | -0.80854  |
| C  | -1.624099 | 0.404692  | 0.93726   |
| C  | -2.44346  | -0.803946 | 1.386022  |
| C  | -3.829199 | -0.795881 | 0.718191  |
| C  | -3.774345 | -0.463266 | -0.786942 |
| C  | -2.842872 | 0.711025  | -1.087864 |
| C  | -3.386777 | 2.087234  | -0.703816 |
| H  | -0.945355 | -2.035406 | 1.522645  |
| H  | -5.036528 | -0.124283 | 2.126944  |
| H  | -3.867236 | -2.284068 | -1.564325 |
| H  | -2.608272 | 3.885297  | -0.72731  |
| H  | -2.048586 | 1.350347  | 1.302488  |
| H  | -2.580127 | -0.76953  | 2.474421  |
| H  | -4.268137 | -1.795831 | 0.836396  |
| H  | -4.792442 | -0.239959 | -1.12681  |
| H  | -2.633363 | 0.718802  | -2.16193  |
| H  | -4.186462 | 2.330444  | -1.416021 |
| H  | -3.819749 | 2.095424  | 0.301338  |
| O  | 4.768342  | 0.90967   | -1.283542 |
| O  | 4.017618  | 0.770509  | 1.604587  |
| O  | 3.515369  | -2.188204 | -0.314811 |
| O  | 1.178776  | -1.454301 | -0.765493 |
| O  | 2.415975  | 1.887458  | -0.223897 |
| C  | 5.43569   | 0.124065  | -0.301058 |
| C  | 4.418571  | -0.271219 | 0.771676  |
| C  | 3.262957  | -0.972875 | 0.084117  |
| C  | 1.898532  | -0.558201 | -0.148481 |
| C  | 1.405039  | 0.90711   | -0.167089 |
| C  | 0.582045  | 1.261015  | 1.073797  |
| H  | 2.99575   | 1.745647  | -0.989788 |
| H  | 5.40137   | 1.2163    | -1.942884 |
| H  | 3.615397  | 1.477756  | 1.06668   |
| H  | 2.693199  | -2.460328 | -0.807314 |
| H  | 5.853784  | -0.78259  | -0.753054 |
| H  | 4.899272  | -1.023645 | 1.407405  |
| H  | 2.111641  | -0.857515 | 1.067661  |
| H  | 0.767654  | 0.950537  | -1.056576 |
| H  | 1.260724  | 1.370324  | 1.925777  |
| H  | 0.05338   | 2.204249  | 0.898378  |
| H  | 6.229535  | 0.693904  | 0.192852  |
| Na | -0.928719 | -1.728022 | -1.15445  |

## 194. Transition States of 4th Iso-L3a C=O Migration

46

|    |           |           |           |
|----|-----------|-----------|-----------|
| O  | 0.82197   | -1.196759 | -0.869022 |
| O  | 3.148259  | -1.795358 | -0.044511 |
| O  | 3.779673  | 1.805189  | -0.170915 |
| O  | 1.470876  | -0.126363 | 1.731154  |
| O  | 1.367638  | 0.968709  | -1.423974 |
| O  | -0.206496 | 3.307655  | 0.684223  |
| C  | 1.794871  | -0.356988 | -1.435704 |
| C  | 3.111256  | -0.498781 | -0.633385 |
| C  | 3.26024   | 0.630908  | 0.414673  |
| C  | 1.904436  | 1.008259  | 1.00053   |
| C  | 0.944726  | 1.4218    | -0.1406   |
| C  | 0.778517  | 2.927195  | -0.280324 |
| H  | 4.064182  | -2.059456 | 0.098267  |
| H  | 4.741522  | 1.772004  | -0.213408 |
| H  | 0.503526  | -0.134039 | 1.823284  |
| H  | -0.127675 | 4.246866  | 0.886369  |
| H  | 1.940217  | -0.615795 | -2.490718 |
| H  | 3.933561  | -0.389434 | -1.349952 |
| H  | 3.89641   | 0.260782  | 1.229927  |
| H  | 2.029288  | 1.861643  | 1.678857  |
| H  | -0.053127 | 1.004481  | 0.076363  |
| H  | 1.730226  | 3.437737  | -0.105656 |
| H  | 0.430713  | 3.146118  | -1.295665 |
| O  | -2.238903 | 2.011595  | -0.747615 |
| O  | -3.622719 | -0.297371 | -1.439865 |
| O  | -2.65257  | 0.287325  | 1.952164  |
| O  | -0.906213 | -1.449739 | 1.620563  |
| O  | -0.719201 | -3.256817 | -0.413393 |
| C  | -3.535229 | 1.800087  | -0.2216   |
| C  | -3.740301 | 0.284511  | -0.167997 |
| C  | -2.693165 | -0.2678   | 0.77583   |
| C  | -1.738281 | -1.347553 | 0.620656  |
| C  | -1.38525  | -2.040556 | -0.715274 |
| C  | -0.416938 | -1.220929 | -1.557924 |
| H  | -1.359842 | -3.940657 | -0.183571 |
| H  | -1.72683  | 2.619816  | -0.184029 |
| H  | -3.083493 | 0.290102  | -1.990445 |
| H  | -1.882953 | -0.154563 | 2.408764  |
| H  | -3.657215 | 2.232198  | 0.774841  |
| H  | -4.735893 | 0.056249  | 0.229747  |
| H  | -2.889354 | -1.794652 | 0.881773  |
| H  | -2.2897   | -2.207448 | -1.303168 |
| H  | -0.287673 | -1.70683  | -2.533568 |
| H  | -0.798056 | -0.20166  | -1.70051  |
| H  | -4.291606 | 2.221936  | -0.892916 |
| Na | 1.115088  | -2.368258 | 1.015605  |

## 195. Reactant of 4th Iso-L3a C=O Migration

46

O 0.82197 -1.196759 -0.869022  
O 3.148259 -1.795358 -0.044511  
O 3.779673 1.805189 -0.170915  
O 1.470876 -0.126363 1.731154  
O 1.367638 0.968709 -1.423974  
O -0.206496 3.307655 0.684223  
C 1.794871 -0.356988 -1.435704  
C 3.111256 -0.498781 -0.633385  
C 3.26024 0.630908 0.414673  
C 1.904436 1.008259 1.00053  
C 0.944726 1.4218 -0.1406  
C 0.778517 2.927195 -0.280324  
H 4.064182 -2.059456 0.098267  
H 4.741522 1.772004 -0.213408  
H 0.503526 -0.134039 1.823284  
H -0.127675 4.246866 0.886369  
H 1.940217 -0.615795 -2.490718  
H 3.933561 -0.389434 -1.349952  
H 3.89641 0.260782 1.229927  
H 2.029288 1.861643 1.678857  
H -0.053127 1.004481 0.076363  
H 1.730226 3.437737 -0.105656  
H 0.430713 3.146118 -1.295665  
O -2.238903 2.011595 -0.747615  
O -3.622719 -0.297371 -1.439865  
O -2.65257 0.287325 1.952164  
O -0.906213 -1.449739 1.620563  
O -0.719201 -3.256817 -0.413393  
C -3.535229 1.800087 -0.2216  
C -3.740301 0.284511 -0.167997  
C -2.693165 -0.2678 0.77583  
C -1.738281 -1.347553 0.620656  
C -1.38525 -2.040556 -0.715274  
C -0.416938 -1.220929 -1.557924  
H -1.359842 -3.940657 -0.183571  
H -1.72683 2.619816 -0.184029  
H -3.083493 0.290102 -1.990445  
H -1.882953 -0.154563 2.408764  
H -3.657215 2.232198 0.774841  
H -4.735893 0.056249 0.229747  
H -2.889354 -1.794652 0.881773  
H -2.2897 -2.207448 -1.303168  
H -0.287673 -1.70683 -2.533568  
H -0.798056 -0.20166 -1.70051  
H -4.291606 2.221936 -0.892916  
Na 1.115088 -2.368258 1.015605
